# Supplementary material for: Colourimetric analysis of thermally altered human bone samples
Source: Springer Nature journal article supplement (doi:10.1038/s41598-019-45420-8), 2019-06-20
Supplement: MOESM1 [file 41598_2019_45420_MOESM1_ESM.pdf]

## Electronic Supplement: Colourimetric analysis of thermally altered human bone samples.

Tristan Krap <sup>1,2,3,4</sup>, Jan M. Ruijter <sup>2</sup>, Kevin Nota <sup>4</sup>, Joyce Karel <sup>4</sup>, A. Lieke Burgers <sup>5</sup>, Maurice C.G. Aalders <sup>5,6</sup>,  
Roelof-Jan Oostra <sup>2</sup>, Wilma Duijst <sup>1,3</sup>

1. Maastricht University, Maastricht, The Netherlands
2. Amsterdam UMC, Location AMC, department of Medical Biology, section Anatomy, Amsterdam, The Netherlands
3. Ars Cogniscendi Foundation for Legal and Forensic Medicine, Wezep, The Netherlands
4. Department of Life Sciences and Technology–Biotechnology–Forensic Science, Van Hall Larenstein, University of Applied Sciences, Leeuwarden, The Netherlands
5. Amsterdam UMC, Location AMC, department of Biomedical Engineering and Physics, Amsterdam, The Netherlands
6. Co van Ledden Hulsebosch Center, Amsterdam, The Netherlands

Corresponding author: Tristan Krap  
 Mail: t.krap@amc.nl  
 Address: Amsterdam UMC, Location AMC,  
 department of Medical Biology, section Anatomy  
 Meibergdreef 15, 1105 AZ Amsterdam, The Netherlands

### **ESM-1 Sample population**

Bone samples in the learning set were divided over 58 subgroups, including exposure temperature, surrounding media, and exposure duration, with a minimum of 10 samples per subgroup (table s1). Samples in the test set were divided over 61 subgroups, including exposure temperature, size of the sample, surrounding medium and exposure duration, with a minimum of 5 samples per subgroup (table s2).

**Table s1.** Heating scheme for the learning set, transverse slices heated in two different media.

| Temperature: | Surrounding medium: | Duration (min.): | N (samples): |
|--------------|---------------------|------------------|--------------|
| Unheated     | -                   | -                | 58           |
| 100°C        | Air                 | 10/20/30         | 12/12/16     |
|              | Adipose tissue      | 10/20/30         | 12/12/16     |
| 150°C        | Air                 | 10/20/30         | 12/12/12     |
|              | Adipose tissue      | 10/20/30         | 12/12/12     |
| 200°C        | Air                 | 10/20/30         | 12/12/16     |
|              | Adipose tissue      | 10/20/30         | 12/12/16     |
| 250°C        | Air                 | 10/20/30         | 10/12/16     |
|              | Adipose tissue      | 10/20/30         | 11/12/16     |
| 300°C        | Air                 | 10/20/30         | 12/12/16     |
|              | Adipose tissue      | 10/20/30         | 12/12/16     |
| 400°C        | Air                 | 10/20/30         | 12/16/12     |
|              | Adipose tissue      | 10/20/30         | 12/16/12     |
| 450°C        | Air                 | 10/20/30         | 10/12/10     |
|              | Adipose tissue      | 10/20/30         | 12/10/10     |
| 500°C        | Air                 | 10/20/30         | 10/10/10     |
| 600°C        | Air                 | 10/20/30         | 10/10/10     |
| 700°C        | Air                 | 10/20/30         | 10/10/10     |
| 800°C        | Air                 | 10/20/30         | 10/10/20     |
| 900°C        | Air                 | 10/20/30         | 10/10/10     |
| Total:       |                     |                  | 833          |

**Table s2.** Heating scheme for the test set, heated transverse larger sections (diaphyseal parts and epiphyseal ends) and transverse slices that were heated for a longer duration, including the surrounding media.

| Temperature: | Type:              | Surrounding medium:   | Duration (min.): | N (samples): |
|--------------|--------------------|-----------------------|------------------|--------------|
| Unheated     | Transverse section | -                     | -                | 5            |
| 100°C        | Transverse section | Air                   | 5/10/20/30/50    | 5/5/5/5/5    |
|              | Larger section     | Adipose tissue<br>Air | 20/30<br>30      | 5/5<br>5     |
| 250°C        | Transverse section | Air                   | 5/10/20/30/50    | 5/5/5/5/5    |
|              | Larger section     | Adipose tissue<br>Air | 20/30<br>30      | 5/5<br>5     |
| 300°C        | Transverse section | Air                   | 5/10/20/30/50    | 5/5/5/5/5    |
|              | Larger section     | Adipose tissue<br>Air | 20/30<br>30      | 5/5<br>5     |
| 350°C        | Transverse section | Air                   | 5/50             | 5/5          |
|              | Larger section     | Air                   | 30               | 5            |
| 450°C        | Transverse section | Air                   | 5/10/20/30/50    | 5/5/5/5/5    |
|              | Larger section     | Air                   | 30               | 5            |
| 500°C        | Transverse section | Air                   | 5/10/20/30/50    | 5/5/5/5/5    |
|              | Larger section     | Air                   | 30               | 5            |
| 600°C        | Transverse section | Air                   | 5/50             | 5/5          |
|              | Larger section     | Air                   | 30               | 5            |
| 650°C        | Transverse section | Air                   | 10/20/30/50      | 5/5/5/5      |
|              | Larger section     | Air                   | 30               | 5            |
| 700°C        | Transverse section | Air                   | 5/10/20/30/50    | 5/5/5/5/5    |
|              | Larger section     | Air                   | 30               | 5            |
| 800°C        | Transverse section | Air                   | 5                | 5            |
| 850°C        | Transverse section | Air                   | 10/20/30/50      | 5/5/5/5      |
|              | Larger section     | Air                   | 30               | 5            |
| 900°C        | Transverse section | Air                   | 5                | 5            |
| Total:       |                    |                       |                  | 305          |

### **ESM-2 Data acquisition by means of ImageJ and colour calibration.**

The X-rite Munsell colourchecker Classic chart as well as all samples were scanned by means of a flatbed scanner (Epson for the learning set and HP for the data set, file type TIFF) and photographically recorded with a DSLR (Nikon D700, stored in file type RAW and converted to TIFF in Adobe Lightroom). The image files were loaded into ImageJ software as shown in fig. s1A (version 1.51j8; Java 1.8.0\_112), and colourimetric data was collected with ImageJ procedures (toolkit: ijp-toolkit\_bin.2.1.0).

In order to collect data in  $L^*A^*B^*$  colours the image has to be converted with the following image processing step: in 'Plugins' select 'Color' and choose 'RGB to  $L^*A^*B^*$  stack'. The converted image is displayed in grayscale (fig. s1B). However, the data presented by the toolkit represents colourimetric data in  $L^*A^*B^*$ , this can be verified by looking up the specific colour for the collected  $L^*A^*B^*$  data. By means of the Selection Brush Tool the surface area of the sample can be selected. This selection excludes a few millimetres from the outskirts of the sample to avoid incorrect measurements due to overexposure and chromatic aberration at the edges of the image bone fragment. The  $L^*A^*B^*$  data can be collected by selecting 'Measurement Bands', which can be found in the submenu 'Color' under 'Plugins'. The mean value of the  $L^*A^*B^*$  parameters for the pixels in the selected surface was used for further analysis. In order to obtain RGB values the same steps should be taken without the conversion to  $L^*A^*B^*$ . In case of colour differences due to differences in heat exposure it is possible to select the areas of the bone to determine the highest and lowest exposure temperature, as can be seen in fig. s2.

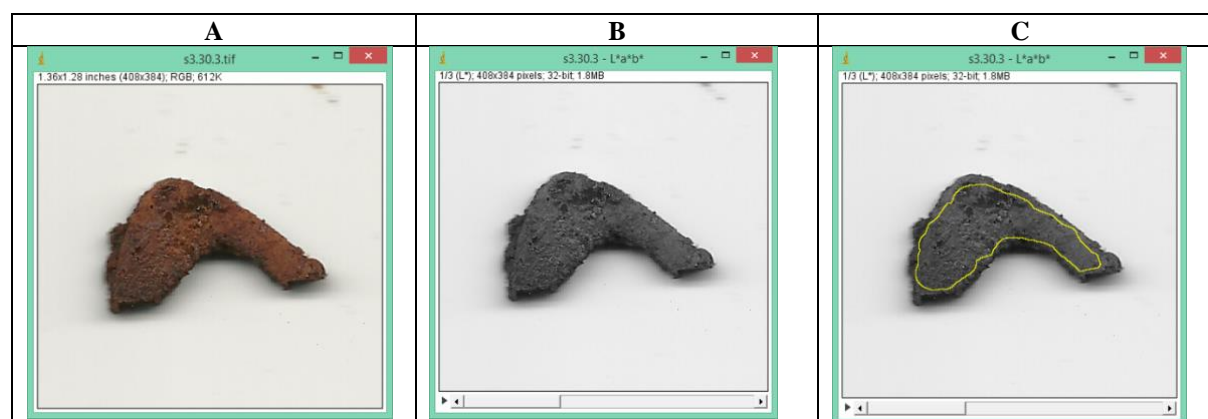

**Fig. s1** Colour extraction in ImageJ based on a scan of a transverse cross section. A: the original image, B: the image converted to  $L^*A^*B^*$ , and C: the selection of the area from which colourimetric data is collected.

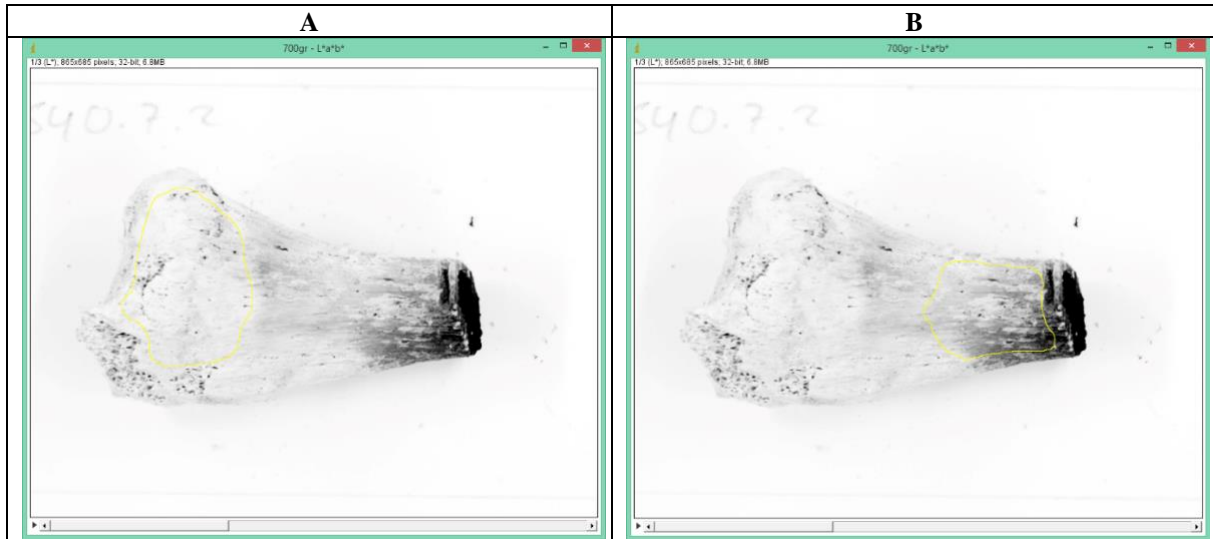

**Fig. s2** Colour extraction in ImageJ based on a photograph of an epiphyses with a small part of the diaphysis. A shows the selection of the white part and B shows the selection of the grey part.

The devices (Flatbed scanners Epson and HP, and DSLR Nikon D700) were colour calibrated by means of an X-rite Munsell colourchecker Classic chart. The chart was scanned prior to scanning the samples, halfway through the scanning session and at the end of the scanning session. The dynamic range and specific colour values and coordinates were measured in Red (R), Green (G), Blue (B), Lightness ( $L^*$ ), A and B-coordinates ( $A^*$ ,  $B^*$ ) for the black, white and tile #2 of the chart. The mean of the values obtained in the three scans of the chart was calculated (see tables s3, s4 and s5), and subsequently measurements values of the bone samples were corrected by adding or subtracting the calculated mean.

**Table s3.** The dynamic range and colour of the flatbed scanner used for the learning set (Epson), based on black, white and tile #2.

|                | R       | G       | B       | $L^*$  | $A^*$  | $B^*$  |
|----------------|---------|---------|---------|--------|--------|--------|
| <b>Black</b>   |         |         |         |        |        |        |
| Colourchart:   | 52      | 52      | 52      | 20,461 | -0,079 | -0,973 |
| Scanner:       | 47,612  | 48,349  | 49,493  | 20,004 | -0,024 | -0,835 |
| <b>White</b>   |         |         |         |        |        |        |
| Colourchart:   | 243     | 243     | 242     | 96,539 | -0,425 | 1,186  |
| Scanner:       | 239,501 | 240,111 | 239,906 | 94,710 | -0,218 | 0,028  |
| <b>Tile #2</b> |         |         |         |        |        |        |
| Colourchart:   | 194     | 150     | 130     | 65,711 | 18,13  | 17,81  |
| Scanner:       | 189,429 | 138,709 | 126,068 | 62,306 | 17,678 | 13,885 |

**Table s4.** The dynamic range and colour of the flatbed scanner used for the test set, based on black, white, and tile #2.

|                | $L^*$   | $B^*$   |
|----------------|---------|---------|
| <b>Black</b>   |         |         |
| Colourchart:   | 20,461  | -0,973  |
| Scanner:       | 20,985  | 2,256   |
| <b>White</b>   |         |         |
| Colourchart:   | 96,539  | 1,186   |
| Scanner:       | 99,650  | 3,772   |
| <b>Tile #2</b> |         |         |
| Colourchart:   | 65,711  | 17,81   |
| Scanner:       | 65,8344 | 21,7182 |

**Table s5.** The dynamic range and colour of the Nikon D700 used for the test set, based on black white, and tile #2.

|                | $L^*$  | $B^*$  |
|----------------|--------|--------|
| <b>Black</b>   |        |        |
| Colourchart:   | 20,461 | -0,973 |
| Camera:        | 5,62   | -3,32  |
| <b>White</b>   |        |        |
| Colourchart:   | 96,539 | 1,186  |
| Camera:        | 98,54  | -0,13  |
| <b>Tile #2</b> |        |        |
| Colourchart:   | 65,711 | 17,81  |
| Camera:        | 81,208 | 15,944 |

### ESM-3 Results of learning set

Fig. s3 shows the colourimetric data for channels Red (R), Green (G), and Blue (B), based on 833 samples heated in the range of 100°C to 900°C for a duration of 10 to 30 minutes in two different media. Fig. s4 shows the colourimetric data for Lightness (L\*) and the A- and B-coordinates (A\*, B\*), based on 833 samples heated in the range of 100°C to 900°C for a duration of 10 to 30 minutes in two different media.

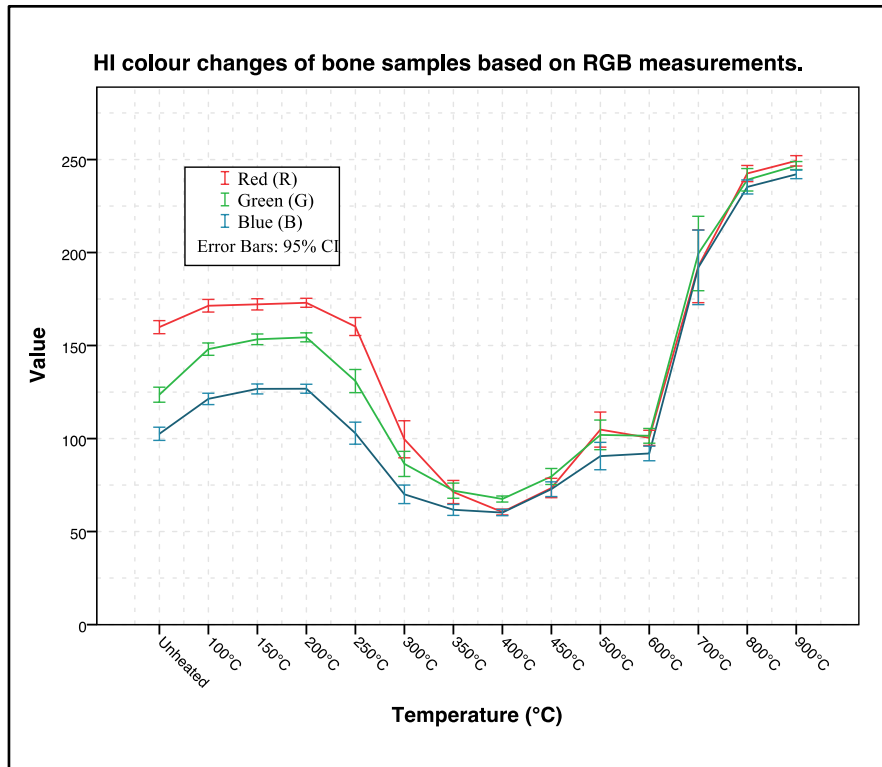

**Fig. s3** HI colour changes of bone samples heated in the range of 100 - 900°C for 10 to 30 minutes in media air and adipose tissue measured in RGB (N=833, see ESM-1, table s1 for information on subgroups).

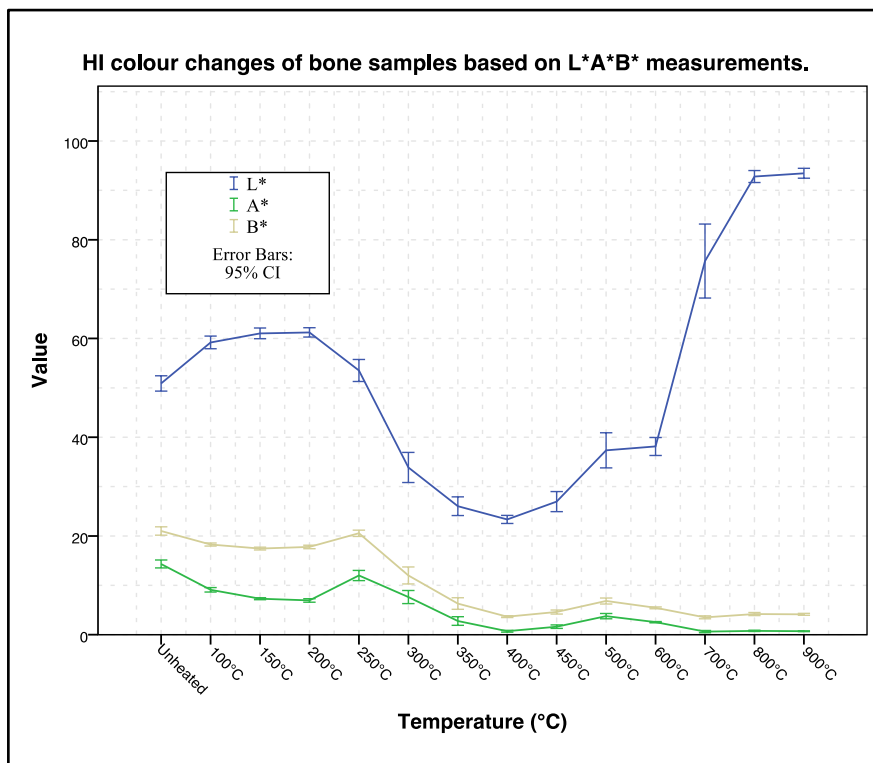

**Fig. s4** HI colour changes of bone samples heated in the range of 100 - 900°C for 10 to 30 minutes in media air and adipose tissue measured in L\*A\*B\* (N=833, see ESM-1, table s1 for information on subgroups).

There was a strong correlation between R, G, B and L\*, based on the Pearson correlations. The correlation between R,G,B,L\* on one hand and A\* and B\* on the other is considerably lower (table s6, also compare fig. s3 and s4). Therefore, the information in the RGB colour model and the L\* channel of the L\*A\*B\* colour model is very similar it was decided to continue with just the L\*A\*B\* colour model. To illustrate the relations between L\*, A\* and B\*, the measured data was plotted in 2D scatterplots. The data of L\* plotted against B\* was more spread out than L\* plotted against A\*, leading to more identifiable clusters (fig. s5).

**Table s6.** Pearson correlations between RGB and L\*A\*B\* (learning set, N=833).

|           |                     | <b>R</b> | <b>G</b> | <b>B</b> | <b>L*</b> | <b>A*</b> | <b>B*</b> |
|-----------|---------------------|----------|----------|----------|-----------|-----------|-----------|
| <b>R</b>  | Pearson Correlation | 1        | 0,963    | 0,910    | 0,982     | 0,289     | 0,432     |
|           | Sig. (2-tailed)     |          | 0,000    | 0,000    | 0,000     | 0,000     | 0,000     |
|           | N                   | 833      | 833      | 833      | 833       | 833       | 833       |
| <b>G</b>  | Pearson Correlation | 0,963    | 1        | 0,981    | 0,988     | 0,038     | 0,201     |
|           | Sig. (2-tailed)     | 0,000    |          | 0,000    | 0,000     | 0,267     | 0,000     |
|           | N                   | 833      | 833      | 833      | 833       | 833       | 833       |
| <b>B</b>  | Pearson Correlation | 0,910    | 0,981    | 1        | 0,957     | -0,100    | 0,029     |
|           | Sig. (2-tailed)     | 0,000    | 0,000    |          | 0,000     | 0,004     | 0,409     |
|           | N                   | 833      | 833      | 833      | 833       | 833       | 833       |
| <b>L*</b> | Pearson Correlation | 0,982    | 0,988    | 0,957    | 1         | 0,136     | 0,297     |
|           | Sig. (2-tailed)     | 0,000    | 0,000    | 0,000    |           | 0,000     | 0,000     |
|           | N                   | 833      | 833      | 833      | 833       | 833       | 833       |
| <b>A*</b> | Pearson Correlation | 0,289    | 0,038    | -0,100   | 0,136     | 1         | 0,896     |
|           | Sig. (2-tailed)     | 0,000    | 0,267    | 0,004    | 0,000     |           | 0,000     |
|           | N                   | 833      | 833      | 833      | 833       | 833       | 833       |
| <b>B*</b> | Pearson Correlation | 0,432    | 0,201    | 0,029    | 0,297     | 0,896     | 1         |
|           | Sig. (2-tailed)     | 0,000    | 0,000    | 0,409    | 0,000     | 0,000     |           |
|           | N                   | 833      | 833      | 833      | 833       | 833       | 833       |

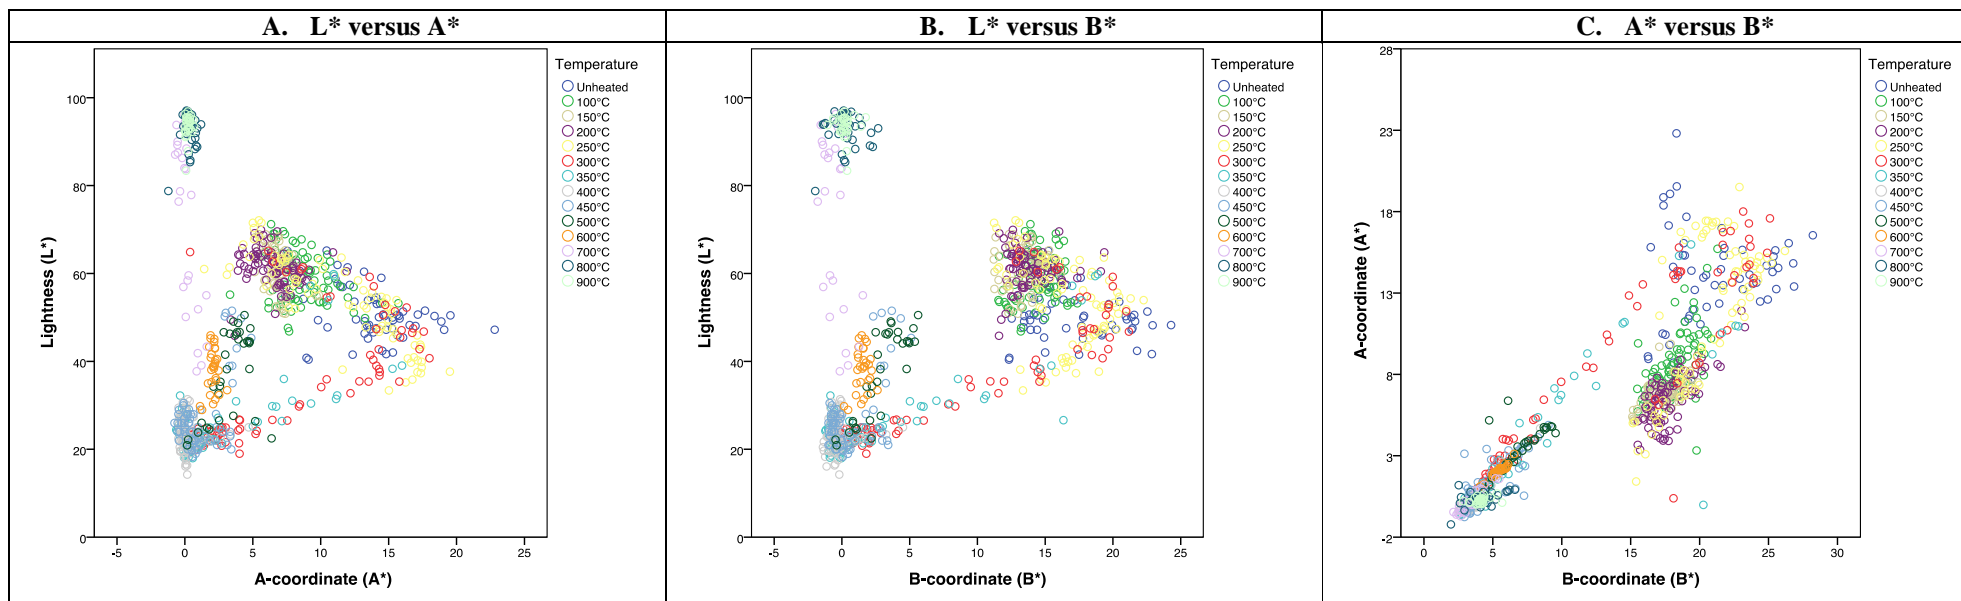

**Fig. s5** 2D scatterplots of the three parameters within the L\*A\*B\* colour space. The data is most spread out when L\* is shown against B\* (B), slightly less when L is shown against A\* (A), and least spread out when B\* is shown against A\* (C). See ESM-3 table 6 for associated correlations.

Testing the effects of the different additional variables in the data set.

To determine the effect of additional variables in the dataset on the variation of the colourimetric parameters a multivariate analysis of variance (MANOVA) was performed on the parameters L\* and B\* with the factors sex, age group, skeletal element, surrounding medium, duration and temperature. Missing categories in a multivariate design are known to bias the results of the MANOVA due to interpolation (fig. s6 and s7), Therefore the analysis was restricted to the samples with an exposure temperature above 300°C. The results of this MANOVA test are shown in table s7 (number of observations per factor) and table s8. Table s8 shows a significant effect of exposure temperature on L\* and B\* and a small effect of surrounding medium on B\*. The effects of the other additional variables not approaching significance. The tests of tow and more-way interactions between the factors only show significance for some interactions involving exposure temperature. This test results shows that the effects of sex, age and skeletal element can be ignored in the analysis of the effect of exposure temperature on the L\* and B\* parameters in the colourimetric dataset. Because of the small effect of surrounding medium and its highly significant interaction with exposure temperature (both on the B\* parameter) this factor was included in the multiple regression analysis (see main text).

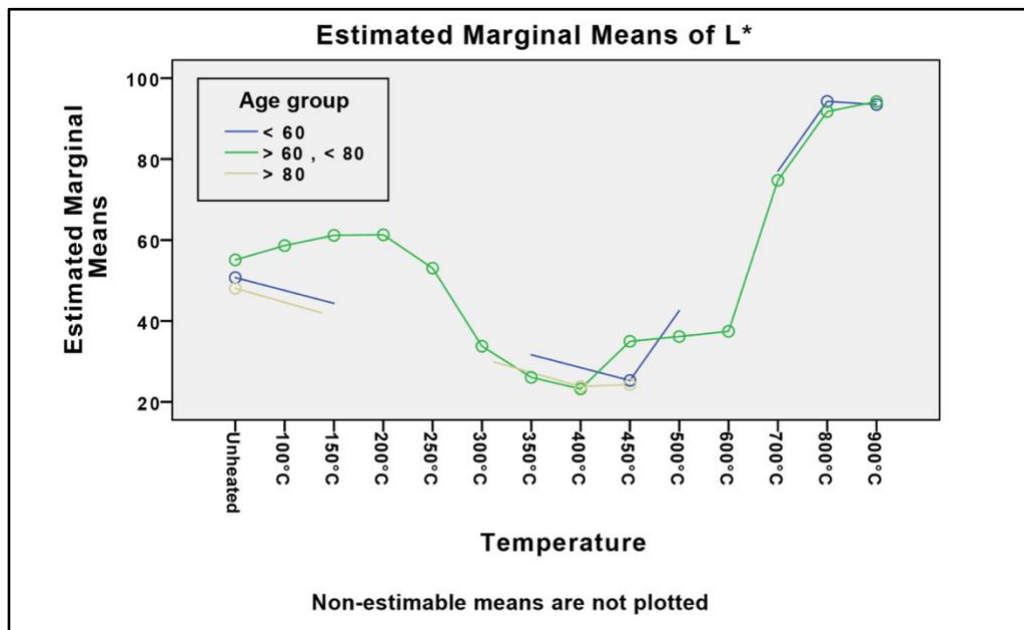

Fig. s6 Graph of the temperature dependent changes of the estimated marginal means of L\*.

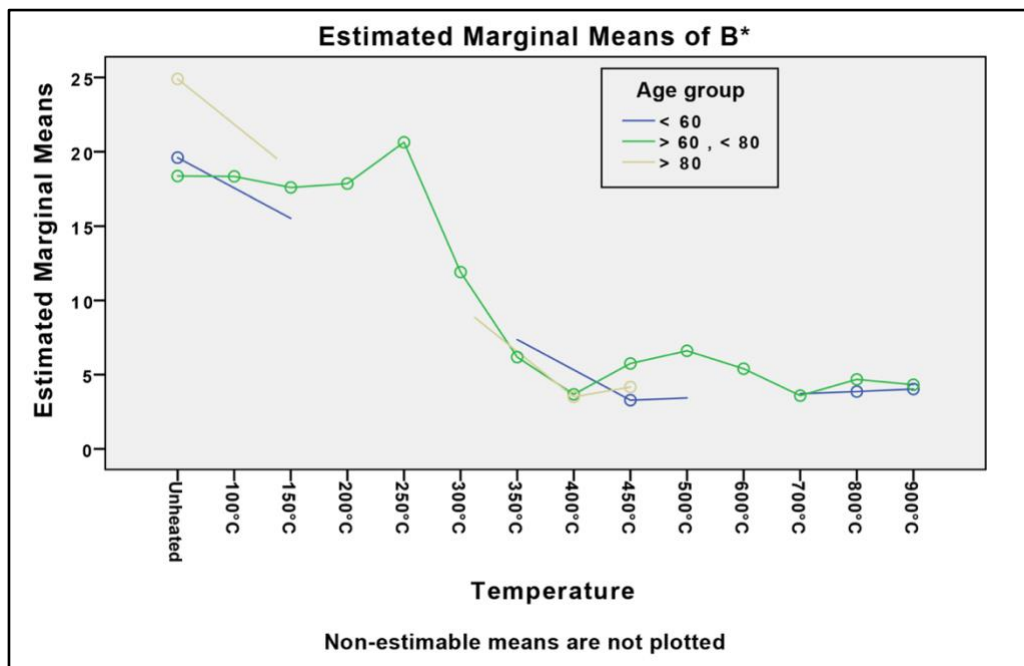

Fig. s7 Graph of the estimated marginal means of B\* plotted against temperature.

**Table s7.** Number of observations per factor in the MANOVA on the learning set. Only samples with an exposure temperature above 300°C were included.

|                  |       | Value Label | N   |
|------------------|-------|-------------|-----|
| Sex              | 1     | Male        | 274 |
|                  | 2     | Female      | 112 |
| Skeletal element | 1     | Ulna        | 151 |
|                  | 2     | Radius      | 179 |
|                  | 3     | Humerus     | 56  |
| Media            | 1     | Air         | 274 |
|                  | 2     | Fat         | 112 |
| Temperature      | 350°C |             | 80  |
|                  | 400°C |             | 80  |
|                  | 450°C |             | 64  |
|                  | 500°C |             | 32  |
|                  | 600°C |             | 30  |
|                  | 700°C |             | 30  |
|                  | 800°C |             | 40  |
|                  | 900°C |             | 30  |
| Age group        | 1     | < 60        | 46  |
|                  | 2     | > 60 , < 80 | 276 |
|                  | 3     | > 80        | 64  |

**Table s8.** Results of the MANOVA on the learning set. Only samples with an exposure temperature above 300°C were included.

| Source                                                   | Dependent Variable | Type III Sum of Squares | df  | Mean Square | F       | Sig. |
|----------------------------------------------------------|--------------------|-------------------------|-----|-------------|---------|------|
| Sex                                                      | L*                 | 86,006                  | 1   | 86,006      | 1,369   | ,243 |
|                                                          | B*                 | 2,078                   | 1   | 2,078       | ,325    | ,569 |
| Skeletal element                                         | L*                 | 92,895                  | 2   | 46,448      | ,739    | ,478 |
|                                                          | B*                 | 5,039                   | 2   | 2,519       | ,394    | ,674 |
| Media                                                    | L*                 | ,238                    | 1   | ,238        | ,004    | ,951 |
|                                                          | B*                 | 22,154                  | 1   | 22,154      | 3,469   | ,063 |
| Temperature                                              | L*                 | 118285,466              | 7   | 16897,924   | 268,892 | ,000 |
|                                                          | B*                 | 378,553                 | 7   | 54,079      | 8,467   | ,000 |
| Age group                                                | L*                 | 7,125                   | 2   | 3,562       | ,057    | ,945 |
|                                                          | B*                 | ,426                    | 2   | ,213        | ,033    | ,967 |
| Sex * Skeletal element                                   | L*                 | 71,701                  | 1   | 71,701      | 1,141   | ,286 |
|                                                          | B*                 | 2,832                   | 1   | 2,832       | ,443    | ,506 |
| Sex * Media                                              | L*                 | 37,366                  | 1   | 37,366      | ,595    | ,441 |
|                                                          | B*                 | ,232                    | 1   | ,232        | ,036    | ,849 |
| Sex * Temperature                                        | L*                 | 1361,871                | 7   | 194,553     | 3,096   | ,004 |
|                                                          | B*                 | 59,566                  | 7   | 8,509       | 1,332   | ,234 |
| Sex * Age group                                          | L*                 | ,000                    | 0   | .           | .       | .    |
|                                                          | B*                 | ,000                    | 0   | .           | .       | .    |
| Skeletal element * Media                                 | L*                 | 171,306                 | 2   | 85,653      | 1,363   | ,257 |
|                                                          | B*                 | 1,287                   | 2   | ,644        | ,101    | ,904 |
| Skeletal element * Temperature                           | L*                 | 493,379                 | 12  | 41,115      | ,654    | ,795 |
|                                                          | B*                 | 21,342                  | 12  | 1,779       | ,278    | ,992 |
| Skeletal element * Age group                             | L*                 | 3,749                   | 1   | 3,749       | ,060    | ,807 |
|                                                          | B*                 | 1,264                   | 1   | 1,264       | ,198    | ,657 |
| Media * Temperature                                      | L*                 | 189,071                 | 2   | 94,535      | 1,504   | ,224 |
|                                                          | B*                 | 97,681                  | 2   | 48,840      | 7,647   | ,001 |
| Media * Age group                                        | L*                 | 13,756                  | 1   | 13,756      | ,219    | ,640 |
|                                                          | B*                 | ,065                    | 1   | ,065        | ,010    | ,920 |
| Temperature * Age group                                  | L*                 | 69,760                  | 2   | 34,880      | ,555    | ,575 |
|                                                          | B*                 | 3,095                   | 2   | 1,547       | ,242    | ,785 |
| Sex * Skeletal element * Media                           | L*                 | 41,472                  | 1   | 41,472      | ,660    | ,417 |
|                                                          | B*                 | 11,993                  | 1   | 11,993      | 1,878   | ,172 |
| Sex * Skeletal element * Temperature                     | L*                 | 21,226                  | 1   | 21,226      | ,338    | ,562 |
|                                                          | B*                 | ,475                    | 1   | ,475        | ,074    | ,785 |
| Sex * Skeletal element * Age group                       | L*                 | ,000                    | 0   | .           | .       | .    |
|                                                          | B*                 | ,000                    | 0   | .           | .       | .    |
| Sex * Media * Temperature                                | L*                 | 36,569                  | 2   | 18,284      | ,291    | ,748 |
|                                                          | B*                 | 18,255                  | 2   | 9,128       | 1,429   | ,241 |
| Sex * Media * Age group                                  | L*                 | ,000                    | 0   | .           | .       | .    |
|                                                          | B*                 | ,000                    | 0   | .           | .       | .    |
| Sex * Temperature * Age group                            | L*                 | ,000                    | 0   | .           | .       | .    |
|                                                          | B*                 | ,000                    | 0   | .           | .       | .    |
| Skeletal element * Media * Temperature                   | L*                 | 23,903                  | 2   | 11,951      | ,190    | ,827 |
|                                                          | B*                 | ,167                    | 2   | ,084        | ,013    | ,987 |
| Skeletal element * Media * Age group                     | L*                 | 4,637                   | 1   | 4,637       | ,074    | ,786 |
|                                                          | B*                 | ,799                    | 1   | ,799        | ,125    | ,724 |
| Skeletal element * Temperature * Age group               | L*                 | ,000                    | 0   | .           | .       | .    |
|                                                          | B*                 | ,000                    | 0   | .           | .       | .    |
| Media * Temperature * Age Group                          | L*                 | 218,099                 | 1   | 218,099     | 3,471   | ,063 |
|                                                          | B*                 | 5,489                   | 1   | 5,489       | ,859    | ,355 |
| Sex * Skeletal element * Media * Temperature             | L*                 | 26,832                  | 1   | 26,832      | ,427    | ,514 |
|                                                          | B*                 | 2,424                   | 1   | 2,424       | ,380    | ,538 |
| Sex * Skeletal element * Media * Age group               | L*                 | ,000                    | 0   | .           | .       | .    |
|                                                          | B*                 | ,000                    | 0   | .           | .       | .    |
| Sex * Skeletal element * Temperature * Age group         | L*                 | ,000                    | 0   | .           | .       | .    |
|                                                          | B*                 | ,000                    | 0   | .           | .       | .    |
| Sex * Media * Temperature * Age group                    | L*                 | ,000                    | 0   | .           | .       | .    |
|                                                          | B*                 | ,000                    | 0   | .           | .       | .    |
| Skeletal element * Media * Temperature * Age group       | L*                 | ,000                    | 0   | .           | .       | .    |
|                                                          | B*                 | ,000                    | 0   | .           | .       | .    |
| Sex * Skeletal element * Media * Temperature * Age group | L*                 | ,000                    | 0   | .           | .       | .    |
|                                                          | B*                 | ,000                    | 0   | .           | .       | .    |
| Error                                                    | L*                 | 20675,242               | 329 | 62,843      |         |      |
|                                                          | B*                 | 2101,250                | 329 | 6,387       |         |      |
| Total                                                    | L*                 | 1038215,163             | 386 |             |         |      |
|                                                          | B*                 | 12159,714               | 386 |             |         |      |

R Squared = ,890 (Adjusted R Squared = ,872) b. R Squared = ,840 (Adjusted R Squared = ,815)

**ESM-4 Colourimetric (calibrated) data learning and test set****Table s9. Raw data of the learning set (1/20)**

| ID nr | Sex  | Age | Skeletal element | Medium | Temp. (°C) | Time (min.) | R      | G      | B      | L*    | A*    | B*    |
|-------|------|-----|------------------|--------|------------|-------------|--------|--------|--------|-------|-------|-------|
| 1     | Male | 66  | Humerus          | Air    | 450        | 30          | 75,61  | 76,36  | 66,57  | 28,02 | 2,29  | 5,69  |
| 2     | Male | 66  | Humerus          | Air    | 450        | 30          | 94,70  | 91,42  | 80,44  | 35,04 | 3,51  | 7,16  |
| 3     | Male | 66  | Humerus          | Air    | 500        | 10          | 71,92  | 72,33  | 62,41  | 26,57 | 2,52  | 5,99  |
| 4     | Male | 66  | Humerus          | Air    | 500        | 10          | 105,89 | 98,97  | 86,07  | 38,26 | 4,75  | 8,70  |
| 5     | Male | 66  | Humerus          | Air    | 500        | 20          | 120,74 | 113,23 | 99,82  | 44,15 | 4,73  | 8,90  |
| 6     | Male | 66  | Humerus          | Air    | 500        | 20          | 120,89 | 113,78 | 100,52 | 44,57 | 4,60  | 8,73  |
| 7     | Male | 66  | Humerus          | Air    | 500        | 30          | 119,97 | 114,79 | 102,35 | 45,01 | 3,94  | 8,02  |
| 8     | Male | 66  | Humerus          | Air    | 500        | 30          | 124,84 | 119,31 | 106,71 | 46,67 | 4,03  | 8,06  |
| 9     | Male | 66  | Humerus          | Air    | 500        | 30          | 118,33 | 112,03 | 99,21  | 44,08 | 4,34  | 8,42  |
| 10    | Male | 66  | Humerus          | Air    | 500        | 30          | 120,69 | 113,34 | 100,01 | 44,46 | 4,70  | 8,87  |
| 11    | Male | 66  | Humerus          | Air    | 600        | 10          | 93,75  | 94,16  | 84,18  | 35,68 | 2,29  | 5,89  |
| 12    | Male | 66  | Humerus          | Air    | 600        | 10          | 95,16  | 95,61  | 85,46  | 36,16 | 2,27  | 6,00  |
| 13    | Male | 66  | Humerus          | Air    | 600        | 20          | 98,72  | 98,56  | 88,35  | 37,91 | 2,48  | 6,12  |
| 14    | Male | 66  | Humerus          | Air    | 600        | 20          | 101,58 | 102,24 | 92,16  | 39,31 | 2,20  | 5,90  |
| 15    | Male | 66  | Humerus          | Air    | 600        | 30          | 100,94 | 102,22 | 93,04  | 38,82 | 2,06  | 5,26  |
| 16    | Male | 66  | Humerus          | Air    | 600        | 30          | 111,14 | 111,79 | 102,31 | 42,94 | 2,21  | 5,51  |
| 17    | Male | 66  | Humerus          | Air    | 700        | 10          | 139,71 | 148,21 | 142,14 | 56,94 | -0,11 | 2,55  |
| 18    | Male | 66  | Humerus          | Air    | 700        | 10          | 147,22 | 154,32 | 147,61 | 59,56 | 0,28  | 3,05  |
| 19    | Male | 66  | Humerus          | Air    | 700        | 20          | 224,74 | 234,63 | 228,68 | 89,25 | -0,55 | 2,53  |
| 20    | Male | 66  | Humerus          | Air    | 700        | 20          | 228,42 | 238,26 | 232,33 | 90,03 | -0,53 | 2,45  |
| 21    | Male | 66  | Humerus          | Air    | 700        | 30          | 244,47 | 250,81 | 242,62 | 94,54 | 0,19  | 3,98  |
| 22    | Male | 66  | Humerus          | Air    | 700        | 30          | 246,26 | 252,45 | 244,41 | 95,29 | 0,25  | 3,92  |
| 23    | Male | 66  | Humerus          | Air    | 800        | 10          | 233,75 | 142,44 | 235,76 | 91,59 | -0,35 | 2,94  |
| 24    | Male | 66  | Humerus          | Air    | 800        | 10          | 237,74 | 243,31 | 234,41 | 92,11 | 0,32  | 4,39  |
| 25    | Male | 66  | Humerus          | Air    | 800        | 20          | 249,01 | 255,11 | 246,71 | 96,10 | 0,22  | 4,06  |
| 26    | Male | 66  | Humerus          | Air    | 800        | 20          | 249,90 | 255,91 | 247,34 | 96,40 | 0,21  | 4,08  |
| 27    | Male | 66  | Humerus          | Air    | 900        | 10          | 246,65 | 252,29 | 243,78 | 95,47 | 0,35  | 4,15  |
| 28    | Male | 66  | Humerus          | Air    | 900        | 10          | 247,61 | 253,29 | 245,06 | 95,34 | 0,37  | 4,05  |
| 29    | Male | 66  | Humerus          | Fat    | 0          | 0           | 154,49 | 118,27 | 95,87  | 49,39 | 15,33 | 18,79 |
| 30    | Male | 66  | Humerus          | Fat    | 0          | 0           | 156,45 | 122,04 | 100,25 | 50,65 | 14,60 | 18,08 |
| 31    | Male | 66  | Humerus          | Air    | 450        | 30          | 56,26  | 60,73  | 52,23  | 19,86 | 0,97  | 4,42  |
| 32    | Male | 66  | Humerus          | Air    | 450        | 30          | 59,86  | 64,62  | 56,37  | 22,51 | 0,98  | 4,33  |
| 33    | Male | 66  | Humerus          | Air    | 500        | 10          | 102,45 | 100,25 | 89,25  | 38,21 | 3,09  | 6,77  |
| 34    | Male | 66  | Humerus          | Air    | 500        | 10          | 107,31 | 106,31 | 95,97  | 41,53 | 2,97  | 6,56  |
| 35    | Male | 66  | Humerus          | Air    | 500        | 20          | 68,79  | 72,39  | 63,54  | 26,00 | 1,23  | 4,73  |
| 36    | Male | 66  | Humerus          | Air    | 500        | 20          | 94,62  | 93,82  | 83,02  | 35,36 | 2,62  | 6,53  |
| 37    | Male | 66  | Humerus          | Air    | 500        | 30          | 129,90 | 125,75 | 113,79 | 49,07 | 3,57  | 7,53  |
| 38    | Male | 66  | Humerus          | Air    | 500        | 30          | 129,91 | 125,19 | 113,39 | 48,74 | 3,92  | 7,57  |
| 39    | Male | 66  | Humerus          | Air    | 600        | 10          | 103,56 | 104,04 | 94,23  | 39,70 | 2,23  | 5,70  |
| 40    | Male | 66  | Humerus          | Air    | 600        | 10          | 105,49 | 106,01 | 96,37  | 40,30 | 2,25  | 5,52  |
| 41    | Male | 66  | Humerus          | Air    | 600        | 20          | 110,73 | 111,54 | 102,08 | 43,08 | 2,21  | 5,50  |
| 42    | Male | 66  | Humerus          | Air    | 600        | 20          | 116,24 | 116,90 | 107,19 | 45,09 | 2,17  | 5,63  |

**Table s9. Raw data of the learning set (2/20)**

| ID nr | Sex  | Age | Skeletal element | Medium | Temp. (°C) | Time (min.) | R      | G      | B      | L*    | A*    | B*    |
|-------|------|-----|------------------|--------|------------|-------------|--------|--------|--------|-------|-------|-------|
| 43    | Male | 66  | Humerus          | Air    | 600        | 30          | 112,47 | 114,24 | 105,12 | 45,24 | 1,89  | 5,18  |
| 44    | Male | 66  | Humerus          | Air    | 600        | 30          | 117,07 | 118,51 | 109,02 | 45,93 | 1,89  | 5,39  |
| 45    | Male | 66  | Humerus          | Air    | 700        | 10          | 122,45 | 129,91 | 122,94 | 50,11 | 0,06  | 3,03  |
| 46    | Male | 66  | Humerus          | Air    | 700        | 10          | 141,09 | 147,71 | 140,38 | 58,40 | 0,20  | 3,26  |
| 47    | Male | 66  | Humerus          | Air    | 700        | 20          | 219,89 | 229,87 | 223,53 | 87,05 | -0,71 | 2,65  |
| 48    | Male | 66  | Humerus          | Air    | 700        | 20          | 222,15 | 231,00 | 223,94 | 87,49 | -0,52 | 2,99  |
| 49    | Male | 66  | Humerus          | Air    | 700        | 30          | 236,81 | 242,60 | 234,04 | 91,87 | 0,30  | 4,20  |
| 50    | Male | 66  | Humerus          | Air    | 700        | 30          | 239,90 | 245,94 | 237,71 | 92,99 | 0,32  | 4,05  |
| 51    | Male | 66  | Humerus          | Air    | 800        | 10          | 193,18 | 205,37 | 199,90 | 78,76 | -1,22 | 1,96  |
| 52    | Male | 66  | Humerus          | Air    | 800        | 10          | 218,45 | 224,05 | 215,72 | 85,79 | 0,40  | 4,08  |
| 53    | Male | 66  | Humerus          | Air    | 800        | 20          | 225,88 | 229,79 | 220,24 | 88,32 | 0,75  | 4,91  |
| 54    | Male | 66  | Humerus          | Air    | 800        | 20          | 234,55 | 239,30 | 229,96 | 90,41 | 0,50  | 4,71  |
| 55    | Male | 66  | Humerus          | Air    | 900        | 10          | 223,56 | 229,77 | 220,89 | 83,39 | 0,09  | 4,31  |
| 56    | Male | 66  | Humerus          | Air    | 900        | 10          | 225,99 | 232,12 | 223,65 | 87,83 | 0,24  | 4,27  |
| 57    | Male | 66  | Humerus          | Fat    | 450        | 30          | 53,24  | 59,60  | 51,77  | 19,71 | 0,51  | 4,00  |
| 58    | Male | 66  | Humerus          | Fat    | 450        | 30          | 54,82  | 61,32  | 53,50  | 20,60 | 0,36  | 3,78  |
| 59    | Male | 66  | Radius           | Air    | 0          | 0           | 120,70 | 99,85  | 77,75  | 40,41 | 9,11  | 16,25 |
| 60    | Male | 66  | Radius           | Air    | 0          | 0           | 122,40 | 101,56 | 79,28  | 40,80 | 8,95  | 16,28 |
| 61    | Male | 66  | Radius           | Air    | 0          | 0           | 169,48 | 138,86 | 112,44 | 56,92 | 11,61 | 19,27 |
| 62    | Male | 66  | Radius           | Fat    | 0          | 0           | 169,31 | 139,22 | 112,86 | 57,16 | 11,42 | 19,19 |
| 63    | Male | 66  | Radius           | Air    | 100        | 10          | 195,52 | 174,29 | 146,93 | 68,94 | 7,36  | 17,79 |
| 64    | Male | 66  | Radius           | Air    | 100        | 10          | 196,16 | 175,71 | 149,04 | 69,60 | 7,24  | 17,44 |
| 65    | Male | 66  | Radius           | Air    | 100        | 10          | 169,99 | 137,20 | 111,02 | 56,94 | 12,42 | 19,58 |
| 66    | Male | 66  | Radius           | Air    | 100        | 10          | 171,99 | 142,62 | 116,54 | 57,69 | 11,24 | 18,94 |
| 67    | Male | 66  | Radius           | Air    | 100        | 20          | 190,97 | 171,09 | 142,20 | 67,64 | 6,70  | 18,54 |
| 68    | Male | 66  | Radius           | Air    | 100        | 20          | 192,65 | 172,73 | 144,34 | 68,26 | 6,56  | 18,03 |
| 69    | Male | 66  | Radius           | Air    | 100        | 20          | 177,08 | 149,77 | 119,71 | 60,67 | 9,26  | 20,33 |
| 70    | Male | 66  | Radius           | Air    | 100        | 20          | 177,13 | 149,59 | 120,18 | 60,69 | 9,61  | 20,09 |
| 71    | Male | 66  | Radius           | Air    | 100        | 30          | 194,53 | 174,80 | 146,59 | 69,01 | 6,61  | 17,91 |
| 72    | Male | 66  | Radius           | Air    | 100        | 30          | 199,52 | 180,64 | 152,55 | 71,21 | 6,35  | 17,84 |
| 73    | Male | 66  | Radius           | Air    | 100        | 30          | 170,14 | 144,65 | 117,81 | 58,38 | 9,53  | 18,63 |
| 74    | Male | 66  | Radius           | Air    | 100        | 30          | 174,80 | 153,08 | 125,27 | 61,21 | 7,66  | 18,40 |
| 75    | Male | 66  | Radius           | Air    | 150        | 10          | 180,67 | 161,04 | 133,47 | 63,77 | 6,83  | 17,97 |
| 76    | Male | 66  | Radius           | Air    | 150        | 10          | 192,10 | 173,40 | 144,83 | 68,28 | 6,83  | 17,95 |
| 77    | Male | 66  | Radius           | Air    | 150        | 10          | 184,61 | 161,44 | 132,35 | 64,19 | 7,91  | 19,14 |
| 78    | Male | 66  | Radius           | Air    | 150        | 10          | 185,42 | 163,50 | 133,82 | 65,28 | 7,39  | 19,22 |
| 79    | Male | 66  | Radius           | Air    | 150        | 20          | 190,38 | 170,15 | 143,37 | 67,38 | 6,95  | 17,17 |
| 80    | Male | 66  | Radius           | Air    | 150        | 20          | 193,77 | 173,00 | 144,89 | 68,38 | 6,92  | 17,91 |
| 81    | Male | 66  | Radius           | Air    | 150        | 20          | 175,59 | 153,51 | 124,00 | 60,72 | 7,69  | 19,46 |
| 82    | Male | 66  | Radius           | Air    | 150        | 20          | 177,97 | 157,03 | 127,06 | 62,72 | 6,80  | 18,91 |
| 83    | Male | 66  | Radius           | Air    | 150        | 30          | 181,55 | 161,79 | 135,97 | 64,75 | 7,18  | 17,00 |
| 84    | Male | 66  | Radius           | Air    | 150        | 30          | 185,16 | 167,16 | 142,00 | 66,37 | 6,53  | 16,26 |

**Table s9. Raw data of the learning set (3/20)**

| ID nr | Sex  | Age | Skeletal element | Medium | Temp. (°C) | Time (min.) | R      | G      | B      | L*    | A*    | B*    |
|-------|------|-----|------------------|--------|------------|-------------|--------|--------|--------|-------|-------|-------|
| 85    | Male | 66  | Radius           | Air    | 150        | 30          | 171,58 | 152,66 | 123,95 | 60,44 | 6,49  | 18,58 |
| 86    | Male | 66  | Radius           | Air    | 150        | 30          | 173,72 | 155,14 | 126,78 | 61,85 | 6,30  | 18,15 |
| 87    | Male | 66  | Radius           | Air    | 200        | 10          | 174,19 | 156,07 | 130,14 | 62,53 | 6,57  | 16,91 |
| 88    | Male | 66  | Radius           | Air    | 200        | 10          | 180,26 | 162,19 | 135,95 | 64,03 | 6,36  | 16,77 |
| 89    | Male | 66  | Radius           | Air    | 200        | 10          | 169,96 | 155,64 | 125,33 | 60,65 | 3,91  | 17,75 |
| 90    | Male | 66  | Radius           | Air    | 200        | 10          | 176,61 | 163,21 | 134,31 | 64,09 | 4,03  | 17,46 |
| 91    | Male | 66  | Radius           | Air    | 200        | 20          | 165,55 | 146,43 | 121,34 | 58,12 | 7,34  | 16,80 |
| 92    | Male | 66  | Radius           | Air    | 200        | 20          | 171,17 | 153,05 | 128,05 | 61,13 | 6,66  | 16,36 |
| 93    | Male | 66  | Radius           | Air    | 200        | 20          | 135,53 | 130,73 | 108,08 | 45,82 | 3,67  | 15,52 |
| 94    | Male | 66  | Radius           | Air    | 200        | 20          | 148,12 | 143,64 | 120,83 | 49,51 | 3,37  | 15,69 |
| 95    | Male | 66  | Radius           | Air    | 200        | 30          | 171,11 | 147,30 | 120,11 | 58,29 | 8,90  | 18,61 |
| 96    | Male | 66  | Radius           | Air    | 200        | 30          | 173,66 | 150,92 | 123,50 | 60,14 | 8,40  | 18,61 |
| 97    | Male | 66  | Radius           | Air    | 200        | 30          | 175,65 | 159,01 | 129,10 | 62,32 | 5,40  | 18,42 |
| 98    | Male | 66  | Radius           | Air    | 200        | 30          | 179,92 | 166,72 | 139,55 | 64,46 | 4,36  | 16,52 |
| 99    | Male | 66  | Radius           | Air    | 250        | 10          | 181,47 | 154,62 | 124,38 | 61,04 | 10,15 | 21,07 |
| 100   | Male | 66  | Radius           | Air    | 250        | 10          | 184,93 | 157,70 | 126,72 | 63,04 | 9,93  | 21,47 |
| 101   | Male | 66  | Radius           | Air    | 250        | 10          | 177,45 | 162,93 | 135,22 | 63,77 | 4,76  | 17,05 |
| 102   | Male | 66  | Radius           | Air    | 250        | 10          | 184,67 | 171,08 | 143,43 | 66,60 | 4,30  | 16,54 |
| 103   | Male | 66  | Radius           | Air    | 250        | 20          | 164,64 | 129,21 | 99,66  | 54,46 | 13,69 | 22,31 |
| 104   | Male | 66  | Radius           | Air    | 250        | 20          | 172,46 | 137,87 | 108,18 | 56,17 | 13,14 | 21,72 |
| 105   | Male | 66  | Radius           | Air    | 250        | 20          | 142,11 | 111,04 | 83,89  | 47,75 | 13,32 | 21,66 |
| 106   | Male | 66  | Radius           | Air    | 250        | 20          | 139,95 | 108,43 | 82,37  | 38,12 | 11,61 | 17,09 |
| 107   | Male | 66  | Radius           | Air    | 250        | 30          | 141,41 | 102,38 | 77,33  | 43,66 | 16,93 | 21,65 |
| 108   | Male | 66  | Radius           | Air    | 250        | 30          | 145,44 | 105,90 | 80,09  | 45,91 | 17,10 | 22,50 |
| 109   | Male | 66  | Radius           | Air    | 250        | 30          | 136,45 | 98,18  | 74,43  | 40,66 | 16,42 | 20,17 |
| 110   | Male | 66  | Radius           | Air    | 250        | 30          | 143,57 | 102,37 | 76,46  | 43,28 | 17,39 | 22,06 |
| 111   | Male | 66  | Radius           | Air    | 300        | 10          | 156,54 | 115,50 | 87,11  | 47,50 | 16,81 | 22,25 |
| 112   | Male | 66  | Radius           | Air    | 300        | 10          | 158,20 | 119,22 | 90,55  | 47,08 | 15,96 | 21,68 |
| 113   | Male | 66  | Radius           | Air    | 300        | 10          | 150,02 | 110,16 | 84,22  | 46,49 | 16,74 | 21,70 |
| 114   | Male | 66  | Radius           | Air    | 300        | 10          | 167,30 | 125,33 | 95,11  | 52,25 | 16,32 | 23,59 |
| 115   | Male | 66  | Radius           | Air    | 300        | 20          | 106,70 | 86,65  | 69,62  | 34,15 | 10,04 | 13,43 |
| 116   | Male | 66  | Radius           | Air    | 300        | 20          | 111,25 | 90,73  | 74,38  | 35,92 | 10,44 | 13,28 |
| 117   | Male | 66  | Radius           | Air    | 300        | 20          | 61,84  | 64,51  | 56,21  | 22,73 | 1,67  | 4,50  |
| 118   | Male | 66  | Radius           | Air    | 300        | 20          | 66,57  | 65,45  | 56,24  | 24,65 | 4,06  | 6,52  |
| 119   | Male | 66  | Radius           | Air    | 300        | 30          | 70,82  | 64,20  | 52,81  | 23,50 | 5,21  | 7,93  |
| 120   | Male | 66  | Radius           | Air    | 300        | 30          | 72,49  | 66,24  | 54,94  | 24,20 | 5,29  | 8,10  |
| 121   | Male | 66  | Radius           | Air    | 300        | 30          | 51,03  | 57,60  | 50,15  | 19,39 | 0,43  | 3,49  |
| 122   | Male | 66  | Radius           | Air    | 300        | 30          | 61,50  | 67,43  | 60,00  | 23,42 | 0,61  | 3,54  |
| 123   | Male | 66  | Radius           | Air    | 350        | 10          | 73,22  | 68,11  | 58,34  | 25,24 | 5,01  | 6,94  |
| 124   | Male | 66  | Radius           | Air    | 350        | 10          | 77,56  | 70,49  | 58,77  | 26,22 | 5,36  | 8,28  |
| 125   | Male | 66  | Radius           | Air    | 350        | 10          | 59,94  | 62,66  | 53,91  | 21,78 | 1,88  | 6,13  |
| 126   | Male | 66  | Radius           | Air    | 350        | 10          | 61,05  | 61,44  | 52,48  | 21,37 | 2,73  | 5,50  |
| 127   | Male | 66  | Radius           | Air    | 350        | 20          | 53,18  | 60,13  | 52,77  | 19,94 | 0,15  | 3,35  |

**Table s9. Raw data of the learning set (4/20)**

| ID nr | Sex  | Age | Skeletal element | Medium | Temp. (°C) | Time (min.) | R      | G      | B      | L*    | A*    | B*    |
|-------|------|-----|------------------|--------|------------|-------------|--------|--------|--------|-------|-------|-------|
| 128   | Male | 66  | Radius           | Air    | 350        | 20          | 53,76  | 59,95  | 52,59  | 20,07 | 0,54  | 3,57  |
| 129   | Male | 66  | Radius           | Air    | 350        | 20          | 66,62  | 73,89  | 66,38  | 26,61 | -0,02 | 20,27 |
| 130   | Male | 66  | Radius           | Air    | 350        | 20          | 68,01  | 74,87  | 67,13  | 27,06 | 0,14  | 3,64  |
| 131   | Male | 66  | Radius           | Air    | 350        | 30          | 49,48  | 55,17  | 47,08  | 17,98 | 0,58  | 3,89  |
| 132   | Male | 66  | Radius           | Air    | 350        | 30          | 53,63  | 59,84  | 52,17  | 19,36 | 0,39  | 3,74  |
| 133   | Male | 66  | Radius           | Air    | 350        | 30          | 63,73  | 71,59  | 64,29  | 25,35 | -0,16 | 3,23  |
| 134   | Male | 66  | Radius           | Air    | 350        | 30          | 78,81  | 87,16  | 79,98  | 32,21 | -0,35 | 3,07  |
| 135   | Male | 66  | Radius           | Air    | 400        | 10          | 54,41  | 61,89  | 54,55  | 20,59 | -0,04 | 3,34  |
| 136   | Male | 66  | Radius           | Air    | 400        | 10          | 59,25  | 66,38  | 58,79  | 23,13 | 0,06  | 3,54  |
| 137   | Male | 66  | Radius           | Air    | 400        | 10          | 63,69  | 71,24  | 63,57  | 25,17 | -0,11 | 3,49  |
| 138   | Male | 66  | Radius           | Air    | 400        | 10          | 65,72  | 73,84  | 66,29  | 26,56 | -0,13 | 3,30  |
| 139   | Male | 66  | Radius           | Air    | 400        | 20          | 46,13  | 53,05  | 45,37  | 16,57 | 0,06  | 3,44  |
| 140   | Male | 66  | Radius           | Air    | 400        | 20          | 50,21  | 57,18  | 49,60  | 19,36 | 0,17  | 3,45  |
| 141   | Male | 66  | Radius           | Air    | 400        | 20          | 67,85  | 76,00  | 68,56  | 27,23 | -0,33 | 3,28  |
| 142   | Male | 66  | Radius           | Air    | 400        | 20          | 69,38  | 77,57  | 70,08  | 27,70 | -0,25 | 3,23  |
| 143   | Male | 66  | Radius           | Fat    | 100        | 10          | 169,58 | 148,65 | 123,42 | 58,94 | 7,90  | 16,97 |
| 144   | Male | 66  | Radius           | Fat    | 100        | 10          | 173,50 | 150,60 | 124,04 | 59,62 | 8,55  | 17,96 |
| 145   | Male | 66  | Radius           | Fat    | 100        | 10          | 186,15 | 162,06 | 134,68 | 64,80 | 8,67  | 18,43 |
| 146   | Male | 66  | Radius           | Fat    | 100        | 10          | 190,58 | 167,71 | 141,02 | 66,96 | 8,15  | 17,77 |
| 147   | Male | 66  | Radius           | Fat    | 100        | 20          | 192,75 | 168,70 | 137,50 | 67,42 | 7,95  | 20,31 |
| 148   | Male | 66  | Radius           | Fat    | 100        | 20          | 199,09 | 175,53 | 144,41 | 69,08 | 6,53  | 19,72 |
| 149   | Male | 66  | Radius           | Fat    | 100        | 20          | 178,17 | 154,02 | 128,06 | 61,66 | 8,67  | 17,63 |
| 150   | Male | 66  | Radius           | Fat    | 100        | 20          | 184,08 | 162,31 | 136,70 | 64,31 | 8,06  | 16,09 |
| 151   | Male | 66  | Radius           | Fat    | 100        | 30          | 182,17 | 159,91 | 131,86 | 64,54 | 7,64  | 18,31 |
| 152   | Male | 66  | Radius           | Fat    | 100        | 30          | 183,83 | 162,96 | 135,40 | 64,43 | 7,27  | 17,87 |
| 153   | Male | 66  | Radius           | Fat    | 100        | 30          | 180,25 | 164,27 | 139,39 | 63,91 | 5,73  | 15,52 |
| 154   | Male | 66  | Radius           | Fat    | 100        | 30          | 181,72 | 160,54 | 132,73 | 64,53 | 7,22  | 18,22 |
| 155   | Male | 66  | Radius           | Fat    | 150        | 10          | 170,75 | 151,30 | 125,23 | 59,84 | 7,14  | 17,21 |
| 156   | Male | 66  | Radius           | Fat    | 150        | 10          | 170,86 | 151,20 | 124,99 | 60,72 | 7,11  | 17,33 |
| 157   | Male | 66  | Radius           | Fat    | 150        | 10          | 174,84 | 160,31 | 136,45 | 63,20 | 5,40  | 15,13 |
| 158   | Male | 66  | Radius           | Fat    | 150        | 10          | 191,47 | 173,56 | 147,18 | 68,90 | 5,95  | 16,59 |
| 159   | Male | 66  | Radius           | Fat    | 150        | 20          | 160,69 | 142,40 | 116,35 | 56,94 | 6,83  | 17,33 |
| 160   | Male | 66  | Radius           | Fat    | 150        | 20          | 162,46 | 143,98 | 117,65 | 57,38 | 6,88  | 17,41 |
| 161   | Male | 66  | Radius           | Fat    | 150        | 20          | 186,58 | 168,08 | 140,90 | 66,72 | 6,40  | 17,48 |
| 162   | Male | 66  | Radius           | Fat    | 150        | 20          | 187,57 | 168,01 | 139,85 | 66,02 | 6,62  | 17,62 |
| 163   | Male | 66  | Radius           | Fat    | 150        | 30          | 145,95 | 128,10 | 102,62 | 52,48 | 6,69  | 17,15 |
| 164   | Male | 66  | Radius           | Fat    | 150        | 30          | 148,76 | 130,65 | 104,74 | 52,68 | 6,96  | 17,15 |
| 165   | Male | 66  | Radius           | Fat    | 150        | 30          | 177,20 | 162,17 | 137,84 | 64,02 | 5,60  | 15,59 |
| 166   | Male | 66  | Radius           | Fat    | 150        | 30          | 178,71 | 164,05 | 139,91 | 65,04 | 5,27  | 15,18 |
| 167   | Male | 66  | Radius           | Fat    | 200        | 10          | 174,51 | 153,36 | 125,85 | 61,01 | 7,49  | 18,04 |
| 168   | Male | 66  | Radius           | Fat    | 200        | 10          | 196,84 | 175,01 | 143,28 | 69,55 | 6,80  | 19,95 |
| 169   | Male | 66  | Radius           | Fat    | 200        | 10          | 187,48 | 172,17 | 146,83 | 67,98 | 5,31  | 15,87 |

**Table s9. Raw data of the learning set (5/20)**

| ID nr | Sex  | Age | Skeletal element | Medium | Temp. (°C) | Time (min.) | R      | G      | B      | L*    | A*    | B*    |
|-------|------|-----|------------------|--------|------------|-------------|--------|--------|--------|-------|-------|-------|
| 170   | Male | 66  | Radius           | Fat    | 200        | 10          | 193,82 | 176,62 | 149,20 | 69,93 | 5,60  | 16,54 |
| 171   | Male | 66  | Radius           | Fat    | 200        | 20          | 169,80 | 146,80 | 119,37 | 59,28 | 8,24  | 18,40 |
| 172   | Male | 66  | Radius           | Fat    | 200        | 20          | 174,71 | 152,61 | 125,20 | 60,59 | 8,01  | 18,25 |
| 173   | Male | 66  | Radius           | Fat    | 200        | 20          | 186,11 | 169,28 | 142,76 | 66,94 | 5,77  | 16,71 |
| 174   | Male | 66  | Radius           | Fat    | 200        | 20          | 191,74 | 176,61 | 151,39 | 69,16 | 5,13  | 15,53 |
| 175   | Male | 66  | Radius           | Fat    | 200        | 30          | 174,98 | 148,82 | 119,59 | 60,85 | 9,13  | 19,83 |
| 176   | Male | 66  | Radius           | Fat    | 200        | 30          | 179,40 | 155,82 | 127,18 | 62,43 | 8,21  | 18,96 |
| 177   | Male | 66  | Radius           | Fat    | 200        | 30          | 189,43 | 170,92 | 143,47 | 68,15 | 6,34  | 17,60 |
| 178   | Male | 66  | Radius           | Fat    | 200        | 30          | 192,10 | 175,28 | 149,00 | 68,71 | 5,78  | 16,46 |
| 179   | Male | 66  | Radius           | Fat    | 250        | 10          | 179,57 | 157,95 | 129,03 | 63,55 | 7,49  | 18,95 |
| 180   | Male | 66  | Radius           | Fat    | 250        | 10          | 183,04 | 160,65 | 132,01 | 64,21 | 7,68  | 18,67 |
| 181   | Male | 66  | Radius           | Fat    | 250        | 10          | 200,83 | 183,65 | 156,14 | 71,54 | 5,64  | 17,00 |
| 182   | Male | 66  | Radius           | Fat    | 250        | 10          | 201,01 | 183,73 | 156,33 | 72,10 | 5,45  | 16,74 |
| 183   | Male | 66  | Radius           | Fat    | 250        | 20          | 162,00 | 136,88 | 107,92 | 55,47 | 9,09  | 19,83 |
| 184   | Male | 66  | Radius           | Fat    | 250        | 20          | 166,62 | 139,94 | 110,71 | 56,43 | 9,70  | 20,16 |
| 185   | Male | 66  | Radius           | Fat    | 250        | 20          | 184,59 | 167,91 | 140,84 | 68,36 | 5,48  | 17,42 |
| 186   | Male | 66  | Radius           | Fat    | 250        | 20          | 188,44 | 172,80 | 145,28 | 67,83 | 5,09  | 16,87 |
| 187   | Male | 66  | Radius           | Fat    | 250        | 30          | 164,51 | 125,30 | 93,22  | 52,40 | 14,89 | 24,17 |
| 188   | Male | 66  | Radius           | Fat    | 250        | 30          | 165,67 | 127,39 | 95,23  | 53,33 | 14,67 | 24,01 |
| 189   | Male | 66  | Radius           | Fat    | 250        | 30          | 177,62 | 142,49 | 109,44 | 58,41 | 12,75 | 23,65 |
| 190   | Male | 66  | Radius           | Fat    | 250        | 30          | 178,64 | 147,26 | 114,96 | 59,52 | 11,03 | 22,30 |
| 191   | Male | 66  | Radius           | Fat    | 300        | 10          | 177,29 | 152,59 | 122,86 | 60,96 | 8,59  | 19,74 |
| 192   | Male | 66  | Radius           | Fat    | 300        | 10          | 178,29 | 153,01 | 122,97 | 61,40 | 8,71  | 19,99 |
| 193   | Male | 66  | Radius           | Fat    | 300        | 10          | 177,31 | 139,41 | 106,70 | 57,08 | 13,91 | 23,91 |
| 194   | Male | 66  | Radius           | Fat    | 300        | 10          | 181,66 | 143,81 | 110,61 | 59,22 | 13,60 | 23,91 |
| 195   | Male | 66  | Radius           | Fat    | 300        | 20          | 129,39 | 98,05  | 76,00  | 40,36 | 13,87 | 18,24 |
| 196   | Male | 66  | Radius           | Fat    | 300        | 20          | 125,33 | 93,98  | 72,58  | 39,01 | 14,10 | 18,10 |
| 197   | Male | 66  | Radius           | Fat    | 300        | 20          | 75,99  | 71,61  | 59,91  | 26,60 | 4,05  | 7,76  |
| 198   | Male | 66  | Radius           | Fat    | 300        | 20          | 78,93  | 74,76  | 62,77  | 26,73 | 4,00  | 7,96  |
| 199   | Male | 66  | Radius           | Fat    | 300        | 30          | 63,27  | 63,44  | 53,20  | 22,41 | 2,28  | 6,01  |
| 200   | Male | 66  | Radius           | Fat    | 300        | 30          | 66,24  | 65,61  | 54,75  | 23,74 | 2,76  | 6,80  |
| 201   | Male | 66  | Radius           | Fat    | 300        | 30          | 57,12  | 62,63  | 54,69  | 21,19 | 0,74  | 3,96  |
| 202   | Male | 66  | Radius           | Fat    | 300        | 30          | 58,25  | 64,71  | 57,13  | 21,83 | 0,45  | 3,75  |
| 203   | Male | 66  | Radius           | Fat    | 350        | 10          | 104,91 | 90,86  | 73,86  | 35,99 | 7,29  | 12,49 |
| 204   | Male | 66  | Radius           | Fat    | 350        | 10          | 93,64  | 79,74  | 65,57  | 31,04 | 7,91  | 10,90 |
| 205   | Male | 66  | Radius           | Fat    | 350        | 10          | 100,94 | 78,61  | 61,20  | 31,45 | 11,13 | 14,42 |
| 206   | Male | 66  | Radius           | Fat    | 350        | 10          | 101,70 | 79,76  | 62,42  | 32,25 | 11,21 | 14,55 |
| 207   | Male | 66  | Radius           | Fat    | 350        | 20          | 74,05  | 73,83  | 62,27  | 27,15 | 2,44  | 7,15  |
| 208   | Male | 66  | Radius           | Fat    | 350        | 20          | 86,39  | 82,08  | 68,20  | 30,91 | 3,77  | 8,94  |
| 209   | Male | 66  | Radius           | Fat    | 350        | 20          | 59,50  | 64,06  | 55,39  | 22,04 | 0,88  | 4,49  |
| 210   | Male | 66  | Radius           | Fat    | 350        | 20          | 59,95  | 63,56  | 54,57  | 22,76 | 1,56  | 5,34  |
| 211   | Male | 66  | Radius           | Fat    | 350        | 30          | 54,06  | 61,06  | 53,88  | 20,48 | 0,19  | 3,16  |
| 212   | Male | 66  | Radius           | Fat    | 350        | 30          | 56,32  | 63,17  | 55,90  | 21,70 | 0,32  | 3,28  |

**Table s9. Raw data of the learning set (6/20)**

| ID nr | Sex  | Age | Skeletal element | Medium | Temp. (°C) | Time (min.) | R      | G      | B      | L*    | A*    | B*    |
|-------|------|-----|------------------|--------|------------|-------------|--------|--------|--------|-------|-------|-------|
| 213   | Male | 66  | Radius           | Fat    | 350        | 30          | 60,04  | 64,18  | 55,28  | 22,56 | 1,07  | 4,78  |
| 214   | Male | 66  | Radius           | Fat    | 350        | 30          | 60,19  | 64,10  | 55,39  | 21,60 | 1,20  | 4,83  |
| 215   | Male | 66  | Radius           | Fat    | 400        | 10          | 61,25  | 63,57  | 54,79  | 21,74 | 1,84  | 5,01  |
| 216   | Male | 66  | Radius           | Fat    | 400        | 10          | 64,81  | 64,59  | 55,04  | 22,62 | 2,63  | 5,69  |
| 217   | Male | 66  | Radius           | Fat    | 400        | 10          | 59,38  | 64,10  | 55,59  | 22,27 | 0,87  | 4,41  |
| 218   | Male | 66  | Radius           | Fat    | 400        | 10          | 59,70  | 63,53  | 54,51  | 22,28 | 1,18  | 4,89  |
| 219   | Male | 66  | Radius           | Fat    | 400        | 20          | 51,70  | 58,34  | 51,20  | 19,13 | 0,44  | 3,26  |
| 220   | Male | 66  | Radius           | Fat    | 400        | 20          | 53,96  | 60,26  | 52,79  | 20,10 | 0,58  | 3,61  |
| 221   | Male | 66  | Radius           | Fat    | 400        | 20          | 56,36  | 63,64  | 56,59  | 21,74 | 0,07  | 3,17  |
| 222   | Male | 66  | Radius           | Fat    | 400        | 20          | 57,04  | 63,85  | 56,60  | 22,14 | 0,24  | 3,33  |
| 223   | Male | 66  | Radius           | Air    | 450        | 30          | 48,35  | 54,09  | 45,99  | 18,28 | 0,56  | 3,99  |
| 224   | Male | 66  | Radius           | Air    | 450        | 30          | 53,41  | 60,23  | 52,67  | 19,98 | 0,21  | 3,54  |
| 225   | Male | 66  | Radius           | Air    | 500        | 10          | 64,88  | 68,81  | 60,06  | 23,81 | 0,97  | 4,47  |
| 226   | Male | 66  | Radius           | Air    | 500        | 10          | 90,44  | 90,27  | 80,08  | 34,40 | 2,58  | 6,15  |
| 227   | Male | 66  | Radius           | Air    | 500        | 20          | 124,21 | 119,87 | 108,37 | 46,60 | 3,84  | 7,40  |
| 228   | Male | 66  | Radius           | Air    | 500        | 20          | 122,10 | 120,64 | 110,09 | 46,63 | 2,87  | 6,42  |
| 229   | Male | 66  | Radius           | Air    | 500        | 30          | 121,06 | 118,22 | 106,99 | 46,29 | 3,31  | 7,14  |
| 230   | Male | 66  | Radius           | Air    | 500        | 30          | 121,77 | 117,64 | 106,32 | 46,14 | 3,76  | 7,29  |
| 231   | Male | 66  | Radius           | Air    | 600        | 10          | 101,18 | 102,20 | 92,80  | 38,37 | 2,14  | 5,44  |
| 232   | Male | 66  | Radius           | Air    | 600        | 10          | 107,07 | 107,22 | 96,98  | 40,52 | 2,37  | 6,03  |
| 233   | Male | 66  | Radius           | Air    | 600        | 20          | 105,96 | 107,82 | 98,86  | 41,60 | 1,96  | 5,10  |
| 234   | Male | 66  | Radius           | Air    | 600        | 20          | 106,09 | 107,71 | 98,59  | 40,85 | 1,90  | 5,13  |
| 235   | Male | 66  | Radius           | Air    | 600        | 30          | 110,42 | 112,30 | 103,13 | 43,28 | 1,80  | 5,16  |
| 236   | Male | 66  | Radius           | Air    | 600        | 30          | 118,54 | 119,23 | 109,30 | 44,42 | 2,16  | 5,75  |
| 237   | Male | 66  | Radius           | Air    | 700        | 10          | 98,35  | 103,23 | 95,47  | 37,74 | 0,87  | 3,77  |
| 238   | Male | 66  | Radius           | Air    | 700        | 10          | 108,05 | 113,06 | 105,04 | 41,86 | 0,95  | 4,22  |
| 239   | Male | 66  | Radius           | Air    | 700        | 20          | 191,33 | 200,94 | 195,47 | 76,36 | -0,46 | 2,14  |
| 240   | Male | 66  | Radius           | Air    | 700        | 20          | 198,14 | 207,04 | 200,88 | 78,70 | -0,35 | 2,67  |
| 241   | Male | 66  | Radius           | Air    | 700        | 30          | 241,64 | 248,42 | 240,65 | 93,27 | 0,13  | 3,63  |
| 242   | Male | 66  | Radius           | Air    | 700        | 30          | 246,72 | 254,12 | 246,64 | 96,27 | -0,02 | 3,47  |
| 243   | Male | 66  | Radius           | Air    | 800        | 10          | 221,64 | 227,61 | 219,11 | 85,33 | 0,39  | 4,17  |
| 244   | Male | 66  | Radius           | Air    | 800        | 10          | 223,22 | 229,33 | 221,29 | 87,11 | 0,28  | 3,93  |
| 245   | Male | 66  | Radius           | Air    | 800        | 20          | 241,48 | 247,37 | 238,58 | 93,04 | 0,21  | 4,34  |
| 246   | Male | 66  | Radius           | Air    | 800        | 20          | 243,26 | 247,57 | 237,34 | 93,78 | 0,57  | 5,37  |
| 247   | Male | 66  | Radius           | Air    | 900        | 10          | 241,16 | 247,30 | 239,08 | 94,75 | 0,30  | 4,08  |
| 248   | Male | 66  | Radius           | Air    | 900        | 10          | 247,35 | 253,53 | 245,21 | 96,85 | 0,21  | 4,11  |
| 249   | Male | 66  | Radius           | Fat    | 450        | 30          | 72,91  | 79,68  | 72,04  | 29,09 | 0,30  | 3,53  |
| 250   | Male | 66  | Radius           | Fat    | 450        | 30          | 76,24  | 84,44  | 77,57  | 30,51 | -0,09 | 3,02  |
| 251   | Male | 66  | Ulna             | Air    | 0          | 0           | 156,85 | 137,39 | 112,25 | 54,89 | 7,38  | 16,88 |
| 252   | Male | 66  | Ulna             | Fat    | 0          | 0           | 156,61 | 134,50 | 108,75 | 54,20 | 8,72  | 18,10 |
| 253   | Male | 66  | Ulna             | Air    | 0          | 0           | 182,44 | 152,41 | 126,16 | 61,94 | 11,24 | 18,93 |
| 254   | Male | 66  | Ulna             | Fat    | 0          | 0           | 188,47 | 158,64 | 132,10 | 65,22 | 10,44 | 17,52 |
| 255   | Male | 66  | Ulna             | Air    | 100        | 10          | 135,91 | 119,12 | 94,64  | 47,61 | 7,59  | 17,15 |

**Table s9. Raw data of the learning set (7/20)**

| ID nr | Sex  | Age | Skeletal element | Medium | Temp. (°C) | Time (min.) | R      | G      | B      | L*    | A*    | B*    |
|-------|------|-----|------------------|--------|------------|-------------|--------|--------|--------|-------|-------|-------|
| 256   | Male | 66  | Ulna             | Air    | 100        | 10          | 136,36 | 117,23 | 92,53  | 46,82 | 7,68  | 17,13 |
| 257   | Male | 66  | Ulna             | Air    | 100        | 10          | 186,50 | 156,57 | 127,35 | 62,73 | 10,70 | 20,41 |
| 258   | Male | 66  | Ulna             | Air    | 100        | 10          | 186,66 | 159,51 | 130,94 | 63,48 | 9,79  | 19,59 |
| 259   | Male | 66  | Ulna             | Air    | 100        | 20          | 148,56 | 131,39 | 108,60 | 53,54 | 9,91  | 15,54 |
| 260   | Male | 66  | Ulna             | Air    | 100        | 20          | 148,71 | 129,05 | 105,04 | 51,33 | 7,83  | 16,55 |
| 261   | Male | 66  | Ulna             | Air    | 100        | 20          | 194,14 | 166,38 | 136,29 | 66,51 | 9,33  | 19,94 |
| 262   | Male | 66  | Ulna             | Air    | 100        | 20          | 194,67 | 169,11 | 139,17 | 67,77 | 8,59  | 19,71 |
| 263   | Male | 66  | Ulna             | Air    | 100        | 30          | 146,19 | 128,30 | 105,02 | 52,90 | 7,05  | 16,04 |
| 264   | Male | 66  | Ulna             | Air    | 100        | 30          | 155,71 | 138,35 | 114,38 | 56,26 | 6,48  | 15,83 |
| 265   | Male | 66  | Ulna             | Air    | 100        | 30          | 177,87 | 154,57 | 126,17 | 62,56 | 7,86  | 18,50 |
| 266   | Male | 66  | Ulna             | Air    | 100        | 30          | 182,35 | 157,78 | 130,59 | 63,30 | 8,84  | 18,42 |
| 267   | Male | 66  | Ulna             | Air    | 150        | 10          | 159,32 | 140,38 | 116,17 | 56,35 | 7,32  | 16,29 |
| 268   | Male | 66  | Ulna             | Air    | 150        | 10          | 161,89 | 143,57 | 119,10 | 57,74 | 6,90  | 16,32 |
| 269   | Male | 66  | Ulna             | Air    | 150        | 10          | 174,27 | 153,28 | 125,27 | 61,33 | 7,33  | 18,44 |
| 270   | Male | 66  | Ulna             | Air    | 150        | 10          | 174,72 | 154,58 | 126,14 | 61,87 | 6,90  | 18,32 |
| 271   | Male | 66  | Ulna             | Air    | 150        | 20          | 134,52 | 134,09 | 109,08 | 54,30 | 7,43  | 16,84 |
| 272   | Male | 66  | Ulna             | Air    | 150        | 20          | 159,98 | 142,34 | 118,02 | 57,03 | 6,71  | 16,09 |
| 273   | Male | 66  | Ulna             | Air    | 150        | 20          | 177,03 | 156,20 | 127,63 | 62,08 | 7,26  | 18,71 |
| 274   | Male | 66  | Ulna             | Air    | 150        | 20          | 178,02 | 157,86 | 129,55 | 62,95 | 7,04  | 18,59 |
| 275   | Male | 66  | Ulna             | Air    | 150        | 30          | 153,45 | 138,12 | 114,84 | 56,48 | 5,81  | 15,18 |
| 276   | Male | 66  | Ulna             | Air    | 150        | 30          | 155,81 | 139,90 | 116,28 | 55,95 | 6,28  | 15,73 |
| 277   | Male | 66  | Ulna             | Air    | 150        | 30          | 163,26 | 143,69 | 115,69 | 57,34 | 6,96  | 18,31 |
| 278   | Male | 66  | Ulna             | Air    | 150        | 30          | 163,32 | 144,08 | 116,50 | 57,48 | 6,80  | 17,96 |
| 279   | Male | 66  | Ulna             | Air    | 200        | 10          | 161,01 | 142,88 | 116,71 | 56,71 | 6,76  | 17,38 |
| 280   | Male | 66  | Ulna             | Air    | 200        | 10          | 163,27 | 143,93 | 116,77 | 57,37 | 6,89  | 17,68 |
| 281   | Male | 66  | Ulna             | Air    | 200        | 10          | 164,38 | 150,28 | 121,73 | 58,81 | 4,53  | 17,81 |
| 282   | Male | 66  | Ulna             | Air    | 200        | 10          | 166,68 | 152,09 | 122,40 | 59,96 | 4,62  | 18,39 |
| 283   | Male | 66  | Ulna             | Air    | 200        | 20          | 168,50 | 149,25 | 122,50 | 60,09 | 6,76  | 17,37 |
| 284   | Male | 66  | Ulna             | Air    | 200        | 20          | 169,29 | 150,49 | 124,35 | 60,08 | 6,80  | 17,07 |
| 285   | Male | 66  | Ulna             | Air    | 200        | 20          | 179,56 | 165,34 | 136,64 | 61,68 | 4,38  | 17,47 |
| 286   | Male | 66  | Ulna             | Air    | 200        | 20          | 180,27 | 167,10 | 139,51 | 65,74 | 4,23  | 16,85 |
| 287   | Male | 66  | Ulna             | Air    | 200        | 30          | 168,33 | 144,18 | 115,15 | 59,15 | 8,08  | 19,26 |
| 288   | Male | 66  | Ulna             | Air    | 200        | 30          | 171,48 | 146,02 | 116,00 | 58,52 | 9,02  | 20,15 |
| 289   | Male | 66  | Ulna             | Air    | 200        | 30          | 162,60 | 143,41 | 114,94 | 57,75 | 6,98  | 18,90 |
| 290   | Male | 66  | Ulna             | Air    | 200        | 30          | 176,97 | 159,35 | 130,95 | 62,65 | 5,91  | 17,91 |
| 291   | Male | 66  | Ulna             | Air    | 250        | 10          | 168,80 | 159,11 | 132,78 | 59,71 | 3,10  | 16,07 |
| 292   | Male | 66  | Ulna             | Air    | 250        | 10          | 170,56 | 160,96 | 135,44 | 61,39 | 3,29  | 15,52 |
| 293   | Male | 66  | Ulna             | Air    | 250        | 20          | 157,12 | 124,61 | 93,77  | 52,31 | 12,38 | 23,04 |
| 294   | Male | 66  | Ulna             | Air    | 250        | 20          | 158,16 | 126,23 | 94,94  | 52,92 | 12,06 | 22,71 |
| 295   | Male | 66  | Ulna             | Air    | 250        | 20          | 150,02 | 114,27 | 84,52  | 48,06 | 14,52 | 23,26 |
| 296   | Male | 66  | Ulna             | Air    | 250        | 20          | 152,35 | 114,41 | 84,53  | 47,25 | 15,34 | 23,22 |
| 297   | Male | 66  | Ulna             | Air    | 250        | 30          | 134,78 | 97,35  | 74,12  | 40,92 | 16,87 | 20,48 |
| 298   | Male | 66  | Ulna             | Air    | 250        | 30          | 139,38 | 100,67 | 77,44  | 43,79 | 17,34 | 20,96 |

**Table s9. Raw data of the learning set (8/20)**

| ID nr | Sex  | Age | Skeletal element | Medium | Temp. (°C) | Time (min.) | R      | G      | B      | L*    | A*    | B*    |
|-------|------|-----|------------------|--------|------------|-------------|--------|--------|--------|-------|-------|-------|
| 299   | Male | 66  | Ulna             | Air    | 250        | 30          | 112,65 | 80,94  | 61,83  | 33,38 | 15,02 | 17,29 |
| 300   | Male | 66  | Ulna             | Air    | 250        | 30          | 122,41 | 85,67  | 64,05  | 35,22 | 16,26 | 18,97 |
| 301   | Male | 66  | Ulna             | Air    | 300        | 10          | 152,59 | 109,59 | 79,12  | 46,78 | 17,59 | 25,10 |
| 302   | Male | 66  | Ulna             | Air    | 300        | 10          | 159,93 | 118,86 | 86,85  | 51,39 | 15,47 | 24,91 |
| 303   | Male | 66  | Ulna             | Air    | 300        | 10          | 138,12 | 103,70 | 76,35  | 42,73 | 14,28 | 21,32 |
| 304   | Male | 66  | Ulna             | Air    | 300        | 10          | 117,10 | 83,48  | 63,04  | 35,40 | 15,79 | 18,50 |
| 305   | Male | 66  | Ulna             | Air    | 300        | 20          | 80,38  | 69,03  | 56,54  | 26,54 | 7,54  | 9,96  |
| 306   | Male | 66  | Ulna             | Air    | 300        | 20          | 75,94  | 67,49  | 56,39  | 26,68 | 6,44  | 8,70  |
| 307   | Male | 66  | Ulna             | Air    | 300        | 20          | 51,87  | 57,73  | 50,08  | 19,72 | 0,73  | 3,80  |
| 308   | Male | 66  | Ulna             | Air    | 300        | 20          | 54,66  | 59,80  | 52,01  | 20,64 | 1,01  | 3,89  |
| 309   | Male | 66  | Ulna             | Air    | 300        | 30          | 58,97  | 59,75  | 50,93  | 20,81 | 2,71  | 5,43  |
| 310   | Male | 66  | Ulna             | Air    | 300        | 30          | 60,28  | 60,25  | 51,05  | 21,61 | 3,00  | 5,88  |
| 311   | Male | 66  | Ulna             | Air    | 300        | 30          | 56,34  | 62,14  | 54,60  | 21,57 | 0,69  | 3,70  |
| 312   | Male | 66  | Ulna             | Air    | 300        | 30          | 61,57  | 67,03  | 59,28  | 23,40 | 0,68  | 3,84  |
| 313   | Male | 66  | Ulna             | Air    | 350        | 10          | 86,34  | 75,31  | 61,92  | 29,69 | 6,72  | 9,95  |
| 314   | Male | 66  | Ulna             | Air    | 350        | 10          | 86,57  | 76,14  | 62,90  | 29,81 | 6,43  | 9,77  |
| 315   | Male | 66  | Ulna             | Air    | 350        | 10          | 56,19  | 60,16  | 51,98  | 20,38 | 1,33  | 4,26  |
| 316   | Male | 66  | Ulna             | Air    | 350        | 10          | 61,65  | 63,37  | 54,79  | 22,20 | 2,21  | 4,98  |
| 317   | Male | 66  | Ulna             | Air    | 350        | 20          | 51,04  | 58,08  | 50,69  | 19,30 | 0,10  | 3,34  |
| 318   | Male | 66  | Ulna             | Air    | 350        | 20          | 56,68  | 64,07  | 56,81  | 20,85 | 0,08  | 3,39  |
| 319   | Male | 66  | Ulna             | Air    | 350        | 20          | 61,93  | 69,14  | 61,41  | 24,32 | -0,06 | 3,55  |
| 320   | Male | 66  | Ulna             | Air    | 350        | 20          | 72,46  | 79,57  | 71,79  | 29,12 | 0,11  | 3,61  |
| 321   | Male | 66  | Ulna             | Air    | 350        | 30          | 49,65  | 56,17  | 48,37  | 18,19 | 0,27  | 3,74  |
| 322   | Male | 66  | Ulna             | Air    | 350        | 30          | 51,05  | 57,64  | 49,70  | 19,02 | 0,14  | 3,80  |
| 323   | Male | 66  | Ulna             | Air    | 350        | 30          | 71,15  | 78,75  | 71,28  | 28,41 | -0,13 | 3,38  |
| 324   | Male | 66  | Ulna             | Air    | 350        | 30          | 72,70  | 80,69  | 73,43  | 29,37 | -0,21 | 3,14  |
| 325   | Male | 66  | Ulna             | Air    | 400        | 10          | 52,87  | 59,71  | 51,94  | 19,76 | 0,13  | 3,65  |
| 326   | Male | 66  | Ulna             | Air    | 400        | 10          | 56,55  | 64,03  | 56,52  | 21,96 | -0,11 | 3,40  |
| 327   | Male | 66  | Ulna             | Air    | 400        | 10          | 64,02  | 71,36  | 63,76  | 25,70 | -0,04 | 3,43  |
| 328   | Male | 66  | Ulna             | Air    | 400        | 10          | 65,14  | 72,55  | 64,78  | 25,90 | -0,11 | 3,56  |
| 329   | Male | 66  | Ulna             | Air    | 400        | 20          | 53,37  | 60,09  | 52,31  | 17,53 | 0,08  | 3,63  |
| 330   | Male | 66  | Ulna             | Air    | 400        | 20          | 54,94  | 61,39  | 53,45  | 22,95 | 0,49  | 4,07  |
| 331   | Male | 66  | Ulna             | Air    | 400        | 20          | 64,62  | 72,18  | 64,40  | 26,74 | -0,30 | 3,43  |
| 332   | Male | 66  | Ulna             | Air    | 400        | 20          | 71,37  | 79,81  | 72,51  | 29,44 | -0,47 | 3,08  |
| 333   | Male | 66  | Ulna             | Fat    | 100        | 10          | 156,92 | 136,60 | 110,59 | 54,56 | 7,82  | 17,74 |
| 334   | Male | 66  | Ulna             | Fat    | 100        | 10          | 163,26 | 142,13 | 115,95 | 57,12 | 7,99  | 17,89 |
| 335   | Male | 66  | Ulna             | Fat    | 100        | 10          | 185,57 | 160,05 | 133,58 | 63,66 | 9,04  | 17,98 |
| 336   | Male | 66  | Ulna             | Fat    | 100        | 10          | 188,31 | 159,61 | 133,06 | 64,30 | 10,48 | 18,58 |
| 337   | Male | 66  | Ulna             | Fat    | 100        | 20          | 153,09 | 134,86 | 111,66 | 53,94 | 7,11  | 15,48 |
| 338   | Male | 66  | Ulna             | Fat    | 100        | 20          | 154,31 | 132,99 | 108,79 | 53,80 | 8,35  | 16,78 |
| 339   | Male | 66  | Ulna             | Fat    | 100        | 30          | 153,27 | 133,76 | 109,07 | 54,10 | 7,75  | 17,09 |
| 340   | Male | 66  | Ulna             | Fat    | 100        | 30          | 159,42 | 139,73 | 115,00 | 57,43 | 7,32  | 16,66 |
| 341   | Male | 66  | Ulna             | Fat    | 100        | 20          | 175,96 | 154,70 | 127,08 | 61,74 | 7,51  | 18,23 |

**Table s9. Raw data of the learning set (9/20)**

| ID nr | Sex  | Age | Skeletal element | Medium | Temp. (°C) | Time (min.) | R      | G      | B      | L*    | A*    | B*    |
|-------|------|-----|------------------|--------|------------|-------------|--------|--------|--------|-------|-------|-------|
| 342   | Male | 66  | Ulna             | Fat    | 100        | 20          | 180,25 | 159,19 | 131,28 | 63,36 | 7,30  | 18,22 |
| 343   | Male | 66  | Ulna             | Fat    | 150        | 10          | 154,06 | 134,26 | 107,42 | 53,38 | 7,44  | 17,97 |
| 344   | Male | 66  | Ulna             | Fat    | 150        | 10          | 154,26 | 134,82 | 108,07 | 54,55 | 7,19  | 18,01 |
| 345   | Male | 66  | Ulna             | Fat    | 100        | 30          | 177,80 | 159,50 | 132,27 | 64,88 | 5,92  | 17,53 |
| 346   | Male | 66  | Ulna             | Fat    | 100        | 30          | 183,87 | 164,34 | 135,82 | 65,34 | 6,64  | 18,38 |
| 347   | Male | 66  | Ulna             | Fat    | 150        | 20          | 146,26 | 127,36 | 102,57 | 50,84 | 7,40  | 16,91 |
| 348   | Male | 66  | Ulna             | Fat    | 150        | 20          | 161,69 | 144,33 | 119,82 | 57,94 | 6,53  | 16,13 |
| 349   | Male | 66  | Ulna             | Fat    | 150        | 10          | 188,08 | 172,03 | 146,69 | 68,93 | 5,46  | 16,26 |
| 350   | Male | 66  | Ulna             | Fat    | 150        | 10          | 189,45 | 170,62 | 142,82 | 67,83 | 6,06  | 17,55 |
| 351   | Male | 66  | Ulna             | Fat    | 150        | 30          | 145,41 | 127,10 | 103,20 | 51,00 | 7,23  | 16,22 |
| 352   | Male | 66  | Ulna             | Fat    | 150        | 30          | 148,50 | 130,46 | 106,32 | 51,89 | 7,17  | 16,31 |
| 353   | Male | 66  | Ulna             | Fat    | 150        | 20          | 166,55 | 152,82 | 128,95 | 60,35 | 5,14  | 15,19 |
| 354   | Male | 66  | Ulna             | Fat    | 150        | 20          | 169,82 | 157,78 | 136,05 | 58,51 | 5,87  | 15,48 |
| 355   | Male | 66  | Ulna             | Fat    | 150        | 30          | 182,94 | 166,62 | 140,83 | 66,20 | 5,64  | 16,30 |
| 356   | Male | 66  | Ulna             | Fat    | 150        | 30          | 186,15 | 171,67 | 147,51 | 68,24 | 5,17  | 15,27 |
| 357   | Male | 66  | Ulna             | Fat    | 200        | 10          | 161,21 | 142,19 | 116,68 | 56,80 | 7,27  | 17,21 |
| 358   | Male | 66  | Ulna             | Fat    | 200        | 10          | 162,89 | 142,91 | 116,36 | 58,01 | 7,29  | 17,85 |
| 359   | Male | 66  | Ulna             | Fat    | 200        | 20          | 156,12 | 136,89 | 112,41 | 54,68 | 7,49  | 16,56 |
| 360   | Male | 66  | Ulna             | Fat    | 200        | 20          | 157,56 | 137,15 | 112,27 | 55,06 | 7,78  | 16,90 |
| 361   | Male | 66  | Ulna             | Fat    | 200        | 10          | 171,85 | 157,31 | 130,13 | 61,03 | 4,71  | 16,28 |
| 362   | Male | 66  | Ulna             | Fat    | 200        | 10          | 172,95 | 156,62 | 128,04 | 61,92 | 5,18  | 17,44 |
| 363   | Male | 66  | Ulna             | Fat    | 200        | 30          | 161,27 | 142,42 | 116,61 | 57,36 | 7,07  | 17,22 |
| 364   | Male | 66  | Ulna             | Fat    | 200        | 30          | 161,34 | 141,74 | 116,13 | 56,84 | 7,46  | 17,30 |
| 365   | Male | 66  | Ulna             | Fat    | 200        | 20          | 169,23 | 156,44 | 128,52 | 62,24 | 4,07  | 17,13 |
| 366   | Male | 66  | Ulna             | Fat    | 200        | 20          | 171,23 | 158,19 | 129,56 | 64,30 | 3,93  | 17,36 |
| 367   | Male | 66  | Ulna             | Fat    | 200        | 30          | 171,79 | 155,58 | 128,54 | 63,30 | 5,20  | 16,79 |
| 368   | Male | 66  | Ulna             | Fat    | 200        | 30          | 176,31 | 160,58 | 132,99 | 63,65 | 5,09  | 16,90 |
| 369   | Male | 66  | Ulna             | Fat    | 250        | 10          | 160,91 | 136,51 | 109,40 | 57,86 | 8,16  | 18,21 |
| 370   | Male | 66  | Ulna             | Fat    | 250        | 10          | 167,26 | 143,98 | 116,20 | 58,51 | 8,25  | 18,88 |
| 371   | Male | 66  | Ulna             | Fat    | 250        | 20          | 119,46 | 128,26 | 101,32 | 52,28 | 7,64  | 18,53 |
| 372   | Male | 66  | Ulna             | Fat    | 250        | 20          | 147,28 | 123,87 | 96,63  | 51,98 | 8,12  | 18,70 |
| 373   | Male | 66  | Ulna             | Fat    | 250        | 10          | 192,80 | 178,70 | 154,17 | 71,52 | 5,01  | 15,16 |
| 374   | Male | 66  | Ulna             | Fat    | 250        | 10          | 193,86 | 179,07 | 154,19 | 70,33 | 5,08  | 15,33 |
| 375   | Male | 66  | Ulna             | Fat    | 250        | 30          | 161,38 | 126,08 | 94,14  | 52,07 | 13,38 | 23,54 |
| 376   | Male | 66  | Ulna             | Fat    | 250        | 30          | 161,85 | 127,31 | 95,97  | 52,74 | 13,18 | 23,24 |
| 377   | Male | 66  | Ulna             | Fat    | 250        | 20          | 180,68 | 148,21 | 116,69 | 60,33 | 11,79 | 22,38 |
| 378   | Male | 66  | Ulna             | Fat    | 250        | 20          | 183,11 | 152,25 | 120,74 | 63,62 | 11,53 | 23,26 |
| 379   | Male | 66  | Ulna             | Fat    | 300        | 10          | 161,31 | 131,19 | 100,23 | 54,78 | 10,71 | 22,01 |
| 380   | Male | 66  | Ulna             | Fat    | 300        | 10          | 161,85 | 129,61 | 98,46  | 54,55 | 10,46 | 21,47 |
| 381   | Male | 66  | Ulna             | Fat    | 250        | 30          | 146,12 | 108,19 | 80,16  | 45,27 | 15,33 | 22,19 |
| 382   | Male | 66  | Ulna             | Fat    | 250        | 30          | 149,16 | 111,68 | 83,00  | 46,71 | 14,30 | 22,77 |
| 383   | Male | 66  | Ulna             | Fat    | 300        | 20          | 113,49 | 86,71  | 69,22  | 35,45 | 12,85 | 14,88 |
| 384   | Male | 66  | Ulna             | Fat    | 300        | 20          | 114,84 | 86,24  | 67,72  | 35,39 | 13,53 | 15,89 |

**Table s9. Raw data of the learning set (10/20)**

| ID nr | Sex  | Age | Skeletal element | Medium | Temp. (°C) | Time (min.) | R      | G      | B      | L*    | A*    | B*    |
|-------|------|-----|------------------|--------|------------|-------------|--------|--------|--------|-------|-------|-------|
| 385   | Male | 66  | Ulna             | Fat    | 300        | 10          | 159,41 | 121,88 | 91,07  | 50,54 | 14,60 | 23,41 |
| 386   | Male | 66  | Ulna             | Fat    | 300        | 10          | 163,65 | 126,13 | 95,32  | 52,85 | 14,75 | 23,61 |
| 387   | Male | 66  | Ulna             | Fat    | 300        | 30          | 59,38  | 64,08  | 55,90  | 21,81 | 1,61  | 4,83  |
| 388   | Male | 66  | Ulna             | Fat    | 300        | 30          | 61,45  | 63,49  | 54,72  | 22,63 | 1,89  | 4,94  |
| 389   | Male | 66  | Ulna             | Fat    | 300        | 20          | 67,89  | 68,60  | 59,08  | 24,53 | 2,50  | 5,80  |
| 390   | Male | 66  | Ulna             | Fat    | 300        | 20          | 68,69  | 68,77  | 58,87  | 24,89 | 2,66  | 6,09  |
| 391   | Male | 66  | Ulna             | Fat    | 350        | 10          | 94,01  | 77,36  | 62,71  | 30,41 | 9,29  | 11,86 |
| 392   | Male | 66  | Ulna             | Fat    | 350        | 10          | 80,95  | 69,68  | 57,26  | 26,41 | 7,14  | 9,47  |
| 393   | Male | 66  | Ulna             | Fat    | 300        | 30          | 61,47  | 66,89  | 59,01  | 23,69 | 0,83  | 4,00  |
| 394   | Male | 66  | Ulna             | Fat    | 300        | 30          | 62,67  | 68,30  | 60,64  | 24,04 | 0,64  | 3,74  |
| 395   | Male | 66  | Ulna             | Fat    | 350        | 20          | 62,52  | 63,87  | 54,11  | 22,31 | 2,05  | 5,64  |
| 396   | Male | 66  | Ulna             | Fat    | 350        | 20          | 67,25  | 67,34  | 56,61  | 24,85 | 2,59  | 6,76  |
| 397   | Male | 66  | Ulna             | Fat    | 350        | 10          | 162,41 | 133,48 | 102,49 | 53,89 | 10,56 | 21,62 |
| 398   | Male | 66  | Ulna             | Fat    | 350        | 10          | 166,91 | 140,84 | 110,22 | 57,20 | 9,23  | 20,92 |
| 399   | Male | 66  | Ulna             | Fat    | 350        | 30          | 63,30  | 66,94  | 58,19  | 23,66 | 1,51  | 4,88  |
| 400   | Male | 66  | Ulna             | Fat    | 350        | 30          | 67,19  | 69,24  | 59,42  | 24,94 | 1,86  | 5,69  |
| 401   | Male | 66  | Ulna             | Fat    | 350        | 20          | 57,52  | 61,77  | 53,58  | 21,57 | 1,21  | 4,43  |
| 402   | Male | 66  | Ulna             | Fat    | 350        | 20          | 59,31  | 63,56  | 55,16  | 22,08 | 1,04  | 4,38  |
| 403   | Male | 66  | Ulna             | Fat    | 400        | 10          | 66,54  | 64,97  | 53,98  | 23,35 | 3,37  | 7,19  |
| 404   | Male | 66  | Ulna             | Fat    | 400        | 10          | 73,50  | 68,27  | 56,05  | 24,98 | 4,69  | 8,43  |
| 405   | Male | 66  | Ulna             | Fat    | 350        | 30          | 54,42  | 59,24  | 51,07  | 20,34 | 0,98  | 4,26  |
| 406   | Male | 66  | Ulna             | Fat    | 350        | 30          | 55,82  | 60,31  | 52,04  | 20,65 | 1,05  | 4,30  |
| 407   | Male | 66  | Ulna             | Fat    | 400        | 20          | 59,45  | 64,22  | 55,99  | 22,00 | 0,98  | 4,38  |
| 408   | Male | 66  | Ulna             | Fat    | 400        | 20          | 61,90  | 64,64  | 55,38  | 22,43 | 1,77  | 5,34  |
| 409   | Male | 66  | Ulna             | Fat    | 400        | 10          | 53,94  | 59,52  | 51,35  | 20,42 | 0,65  | 4,18  |
| 410   | Male | 66  | Ulna             | Fat    | 400        | 10          | 54,11  | 59,94  | 51,99  | 20,43 | 0,50  | 3,87  |
| 411   | Male | 66  | Ulna             | Fat    | 400        | 20          | 59,99  | 65,53  | 57,33  | 22,36 | 0,54  | 4,04  |
| 412   | Male | 66  | Ulna             | Fat    | 400        | 20          | 62,90  | 67,62  | 58,97  | 23,70 | 0,85  | 4,48  |
| 413   | Male | 56  | Radius           | Air    | 800        | 30          | 249,38 | 242,83 | 238,12 | 93,21 | 0,38  | 3,91  |
| 414   | Male | 56  | Radius           | Air    | 800        | 30          | 252,67 | 245,31 | 241,77 | 94,12 | 0,33  | 3,51  |
| 415   | Male | 56  | Radius           | Air    | 800        | 30          | 254,88 | 247,87 | 244,44 | 96,32 | 0,40  | 4,37  |
| 416   | Male | 56  | Radius           | Air    | 800        | 30          | 255,22 | 248,30 | 244,76 | 96,45 | 0,08  | 4,24  |
| 417   | Male | 56  | Radius           | Air    | 800        | 30          | 254,88 | 247,84 | 244,34 | 96,10 | 0,53  | 4,05  |
| 418   | Male | 56  | Radius           | Air    | 800        | 30          | 241,45 | 234,74 | 232,38 | 93,12 | 0,09  | 3,93  |
| 419   | Male | 56  | Radius           | Air    | 800        | 30          | 242,60 | 235,65 | 232,77 | 95,45 | 0,45  | 3,79  |
| 420   | Male | 56  | Radius           | Air    | 800        | 30          | 252,78 | 244,57 | 242,87 | 96,88 | 0,23  | 3,38  |
| 421   | Male | 56  | Radius           | Air    | 800        | 30          | 253,93 | 246,96 | 243,32 | 95,42 | 0,32  | 5,22  |
| 422   | Male | 56  | Radius           | Air    | 800        | 30          | 250,55 | 243,83 | 239,77 | 96,13 | -0,17 | 4,10  |
| 423   | Male | 56  | Radius           | Air    | 900        | 20          | 254,22 | 256,97 | 254,13 | 93,77 | 0,22  | 2,86  |
| 424   | Male | 56  | Radius           | Air    | 900        | 20          | 254,34 | 245,74 | 243,11 | 94,35 | 0,33  | 4,34  |
| 425   | Male | 56  | Radius           | Air    | 900        | 20          | 255,99 | 249,21 | 245,67 | 95,33 | 0,14  | 3,29  |
| 426   | Male | 56  | Radius           | Air    | 900        | 20          | 251,66 | 245,30 | 241,76 | 91,31 | 0,14  | 4,24  |
| 427   | Male | 56  | Radius           | Air    | 900        | 20          | 253,76 | 246,10 | 244,12 | 92,89 | 0,41  | 4,36  |

**Table s9. Raw data of the learning set (11/20)**

| ID nr | Sex  | Age | Skeletal element | Medium | Temp. (°C) | Time (min.) | R      | G      | B      | L*    | A*    | B*   |
|-------|------|-----|------------------|--------|------------|-------------|--------|--------|--------|-------|-------|------|
| 428   | Male | 56  | Radius           | Air    | 900        | 20          | 249,77 | 242,78 | 240,08 | 93,46 | 0,05  | 4,05 |
| 429   | Male | 56  | Radius           | Air    | 900        | 20          | 252,24 | 245,42 | 241,76 | 92,96 | 0,31  | 3,99 |
| 430   | Male | 56  | Radius           | Air    | 900        | 20          | 250,64 | 243,76 | 241,77 | 92,24 | 0,54  | 3,87 |
| 431   | Male | 56  | Radius           | Air    | 900        | 20          | 250,31 | 243,52 | 240,76 | 95,54 | 0,12  | 5,68 |
| 432   | Male | 56  | Radius           | Air    | 900        | 20          | 252,97 | 245,41 | 243,06 | 92,35 | 0,01  | 3,79 |
| 433   | Male | 56  | Ulna             | Air    | 800        | 30          | 246,87 | 239,67 | 236,11 | 93,83 | 0,40  | 4,50 |
| 434   | Male | 56  | Ulna             | Air    | 800        | 30          | 244,99 | 238,24 | 234,68 | 92,87 | 0,46  | 4,05 |
| 435   | Male | 56  | Ulna             | Air    | 800        | 30          | 255,60 | 248,32 | 245,81 | 91,76 | 0,13  | 3,68 |
| 436   | Male | 56  | Ulna             | Air    | 800        | 30          | 253,65 | 246,64 | 243,73 | 90,80 | 0,77  | 4,31 |
| 437   | Male | 56  | Ulna             | Air    | 800        | 30          | 252,55 | 245,57 | 242,43 | 94,88 | 0,77  | 3,38 |
| 438   | Male | 56  | Ulna             | Air    | 800        | 30          | 252,85 | 245,31 | 241,54 | 93,92 | 1,19  | 2,53 |
| 439   | Male | 56  | Ulna             | Air    | 800        | 30          | 254,40 | 247,44 | 244,77 | 93,49 | -0,12 | 4,91 |
| 440   | Male | 56  | Ulna             | Air    | 800        | 30          | 249,70 | 242,76 | 239,77 | 92,21 | 0,13  | 4,01 |
| 441   | Male | 56  | Ulna             | Air    | 800        | 30          | 248,34 | 241,85 | 238,79 | 93,87 | 0,09  | 2,61 |
| 442   | Male | 56  | Ulna             | Air    | 800        | 30          | 253,34 | 246,30 | 239,89 | 94,21 | 0,45  | 2,70 |
| 443   | Male | 56  | Ulna             | Air    | 900        | 30          | 254,43 | 246,32 | 244,67 | 94,56 | 0,41  | 3,68 |
| 444   | Male | 56  | Ulna             | Air    | 900        | 30          | 255,51 | 248,72 | 246,17 | 94,75 | 0,35  | 4,27 |
| 445   | Male | 56  | Ulna             | Air    | 450        | 20          | 74,93  | 82,31  | 77,13  | 23,98 | -0,39 | 2,95 |
| 446   | Male | 56  | Ulna             | Air    | 900        | 30          | 252,36 | 245,31 | 242,82 | 91,08 | 0,04  | 4,09 |
| 447   | Male | 56  | Ulna             | Air    | 450        | 20          | 76,93  | 84,68  | 79,29  | 27,97 | 0,43  | 3,26 |
| 448   | Male | 56  | Ulna             | Air    | 900        | 30          | 249,74 | 243,74 | 240,15 | 94,88 | 0,12  | 3,28 |
| 449   | Male | 56  | Ulna             | Air    | 900        | 30          | 252,90 | 246,10 | 242,91 | 94,54 | 0,11  | 3,91 |
| 450   | Male | 56  | Ulna             | Air    | 450        | 20          | 75,93  | 83,70  | 79,06  | 21,98 | 0,66  | 3,49 |
| 451   | Male | 56  | Ulna             | Air    | 900        | 30          | 252,52 | 245,48 | 243,06 | 92,32 | 0,06  | 4,23 |
| 452   | Male | 56  | Ulna             | Air    | 450        | 20          | 77,93  | 85,74  | 80,02  | 25,97 | -0,53 | 3,35 |
| 453   | Male | 56  | Ulna             | Air    | 900        | 30          | 254,81 | 247,57 | 245,51 | 95,00 | 0,61  | 4,34 |
| 454   | Male | 56  | Ulna             | Air    | 450        | 20          | 69,94  | 77,55  | 72,48  | 25,97 | 0,27  | 3,16 |
| 455   | Male | 56  | Ulna             | Air    | 900        | 30          | 253,11 | 246,32 | 243,81 | 92,75 | 0,23  | 4,07 |
| 456   | Male | 56  | Ulna             | Air    | 450        | 20          | 62,94  | 70,62  | 65,86  | 25,97 | -0,04 | 3,47 |
| 457   | Male | 56  | Ulna             | Air    | 900        | 30          | 254,66 | 246,10 | 242,07 | 93,09 | 0,31  | 4,28 |
| 458   | Male | 56  | Ulna             | Air    | 900        | 30          | 250,60 | 244,00 | 241,90 | 92,13 | 0,10  | 3,97 |
| 459   | Male | 87  | Radius           | Air    | 400        | 30          | 57,14  | 67,75  | 62,62  | 23,54 | -0,30 | 3,29 |
| 460   | Male | 87  | Radius           | Air    | 400        | 30          | 67,78  | 77,76  | 68,57  | 22,24 | -0,24 | 3,41 |
| 461   | Male | 87  | Radius           | Air    | 400        | 30          | 68,22  | 79,82  | 72,42  | 27,32 | 0,55  | 3,60 |
| 462   | Male | 87  | Radius           | Air    | 400        | 30          | 56,67  | 62,52  | 55,25  | 16,33 | 0,16  | 3,38 |
| 463   | Male | 87  | Radius           | Air    | 450        | 10          | 72,93  | 81,02  | 74,95  | 27,97 | 0,13  | 3,79 |
| 464   | Male | 87  | Radius           | Air    | 400        | 30          | 49,78  | 57,98  | 52,65  | 21,90 | -0,15 | 3,82 |
| 465   | Male | 87  | Radius           | Air    | 400        | 30          | 53,33  | 62,44  | 56,35  | 23,33 | -0,22 | 3,29 |
| 466   | Male | 87  | Radius           | Air    | 450        | 10          | 67,94  | 76,81  | 71,09  | 26,97 | -0,05 | 3,14 |
| 467   | Male | 87  | Radius           | Air    | 450        | 10          | 69,94  | 78,32  | 72,44  | 25,97 | -0,77 | 2,94 |
| 468   | Male | 87  | Radius           | Air    | 450        | 10          | 67,94  | 76,43  | 71,17  | 27,97 | 0,23  | 3,94 |
| 469   | Male | 87  | Radius           | Air    | 450        | 10          | 66,94  | 75,32  | 70,08  | 29,97 | -0,11 | 3,18 |
| 470   | Male | 87  | Radius           | Air    | 450        | 20          | 79,93  | 88,13  | 81,85  | 27,97 | -0,48 | 3,14 |

**Table s9. Raw data of the learning set (12/20)**

| ID nr | Sex  | Age | Skeletal element | Medium | Temp. (°C) | Time (min.) | R     | G     | B     | L*    | A*    | B*   |
|-------|------|-----|------------------|--------|------------|-------------|-------|-------|-------|-------|-------|------|
| 471   | Male | 87  | Radius           | Air    | 450        | 20          | 60,94 | 68,94 | 63,13 | 23,98 | -0,01 | 3,34 |
| 472   | Male | 87  | Radius           | Air    | 450        | 20          | 76,93 | 84,54 | 79,84 | 25,97 | -0,23 | 3,26 |
| 473   | Male | 87  | Radius           | Air    | 450        | 20          | 65,94 | 73,34 | 69,03 | 26,97 | 0,37  | 3,81 |
| 474   | Male | 87  | Radius           | Air    | 450        | 20          | 72,93 | 80,93 | 76,03 | 21,98 | -0,43 | 3,88 |
| 475   | Male | 87  | Radius           | Air    | 450        | 20          | 79,93 | 87,49 | 82,76 | 27,97 | 0,62  | 3,36 |
| 476   | Male | 87  | Radius           | Fat    | 400        | 30          | 63,45 | 72,34 | 66,00 | 22,42 | -0,48 | 3,14 |
| 477   | Male | 87  | Radius           | Fat    | 400        | 30          | 60,48 | 67,64 | 60,88 | 24,65 | 0,14  | 4,07 |
| 478   | Male | 87  | Radius           | Fat    | 400        | 30          | 69,21 | 77,72 | 70,61 | 27,32 | 0,64  | 3,88 |
| 479   | Male | 87  | Radius           | Fat    | 400        | 30          | 63,30 | 72,75 | 67,24 | 30,72 | -0,15 | 3,18 |
| 480   | Male | 87  | Radius           | Fat    | 400        | 30          | 60,94 | 69,92 | 62,81 | 24,98 | 0,88  | 3,57 |
| 481   | Male | 87  | Radius           | Fat    | 450        | 10          | 63,94 | 72,24 | 66,61 | 21,98 | 1,88  | 4,89 |
| 482   | Male | 87  | Radius           | Fat    | 400        | 30          | 67,94 | 74,92 | 68,81 | 22,98 | 0,25  | 3,38 |
| 483   | Male | 87  | Radius           | Fat    | 450        | 10          | 68,94 | 77,44 | 72,11 | 21,98 | 0,77  | 3,29 |
| 484   | Male | 87  | Radius           | Fat    | 450        | 10          | 69,94 | 78,00 | 71,86 | 23,98 | 2,77  | 4,88 |
| 485   | Male | 87  | Radius           | Fat    | 450        | 10          | 64,94 | 73,22 | 66,96 | 22,98 | 3,33  | 6,14 |
| 486   | Male | 87  | Radius           | Fat    | 450        | 10          | 69,94 | 78,33 | 71,92 | 21,98 | 2,23  | 6,90 |
| 487   | Male | 87  | Radius           | Fat    | 450        | 10          | 65,94 | 74,21 | 68,40 | 24,98 | 0,99  | 6,64 |
| 488   | Male | 87  | Radius           | Fat    | 450        | 20          | 59,95 | 68,72 | 62,52 | 20,98 | 2,37  | 7,34 |
| 489   | Male | 87  | Radius           | Fat    | 450        | 20          | 56,95 | 65,89 | 60,00 | 18,98 | 0,79  | 4,37 |
| 490   | Male | 87  | Radius           | Fat    | 450        | 20          | 60,94 | 69,74 | 63,16 | 23,98 | 0,99  | 3,20 |
| 491   | Male | 87  | Radius           | Fat    | 450        | 20          | 58,95 | 67,61 | 61,39 | 23,98 | 3,33  | 6,90 |
| 492   | Male | 87  | Radius           | Fat    | 450        | 20          | 52,52 | 61,89 | 56,29 | 20,98 | 0,57  | 4,05 |
| 493   | Male | 87  | Radius           | Fat    | 450        | 20          | 61,94 | 69,95 | 64,65 | 24,98 | 2,31  | 5,44 |
| 494   | Male | 87  | Ulna             | Air    | 400        | 30          | 66,62 | 74,45 | 66,57 | 23,77 | -0,22 | 3,51 |
| 495   | Male | 87  | Ulna             | Air    | 400        | 30          | 65,00 | 73,17 | 68,26 | 24,43 | -0,15 | 3,55 |
| 496   | Male | 87  | Ulna             | Air    | 400        | 30          | 61,54 | 68,42 | 63,28 | 19,59 | -0,13 | 3,16 |
| 497   | Male | 87  | Ulna             | Air    | 400        | 30          | 44,55 | 51,64 | 46,64 | 14,23 | 0,18  | 3,73 |
| 498   | Male | 87  | Ulna             | Air    | 450        | 10          | 67,94 | 76,09 | 70,30 | 23,98 | 0,54  | 3,88 |
| 499   | Male | 87  | Ulna             | Air    | 400        | 30          | 54,51 | 63,16 | 56,98 | 22,69 | -0,15 | 3,65 |
| 500   | Male | 87  | Ulna             | Air    | 400        | 30          | 44,20 | 51,65 | 46,43 | 19,45 | -0,33 | 3,33 |
| 501   | Male | 87  | Ulna             | Air    | 450        | 10          | 73,93 | 82,46 | 76,72 | 24,98 | 0,00  | 3,27 |
| 502   | Male | 87  | Ulna             | Air    | 450        | 10          | 73,93 | 82,77 | 76,70 | 23,98 | -0,54 | 3,36 |
| 503   | Male | 87  | Ulna             | Air    | 450        | 10          | 67,94 | 76,77 | 70,83 | 28,97 | -0,43 | 3,35 |
| 504   | Male | 87  | Ulna             | Air    | 450        | 10          | 70,93 | 79,72 | 74,24 | 25,97 | 0,31  | 3,73 |
| 505   | Male | 87  | Ulna             | Fat    | 400        | 30          | 67,12 | 75,72 | 70,52 | 22,31 | 0,55  | 3,73 |
| 506   | Male | 87  | Ulna             | Fat    | 400        | 30          | 64,22 | 73,17 | 67,41 | 28,20 | -0,05 | 3,80 |
| 507   | Male | 87  | Ulna             | Fat    | 400        | 30          | 60,35 | 68,74 | 62,61 | 19,66 | -0,33 | 2,94 |
| 508   | Male | 87  | Ulna             | Fat    | 400        | 30          | 70,39 | 78,23 | 71,82 | 31,39 | 0,20  | 3,80 |
| 509   | Male | 87  | Ulna             | Fat    | 400        | 30          | 65,94 | 73,92 | 69,81 | 26,97 | -0,42 | 2,94 |
| 510   | Male | 87  | Ulna             | Fat    | 450        | 10          | 66,94 | 75,75 | 69,92 | 22,98 | 1,46  | 4,52 |
| 511   | Male | 87  | Ulna             | Fat    | 400        | 30          | 67,98 | 73,92 | 69,81 | 30,97 | 0,36  | 3,88 |
| 512   | Male | 87  | Ulna             | Fat    | 450        | 10          | 59,95 | 68,31 | 62,65 | 21,98 | 1,37  | 3,92 |
| 513   | Male | 87  | Ulna             | Fat    | 450        | 10          | 68,94 | 77,71 | 71,26 | 19,98 | 0,89  | 3,45 |

**Table s9. Raw data of the learning set (13/20)**

| ID nr | Sex    | Age | Skeletal element | Medium | Temp. (°C) | Time (min.) | R      | G      | B      | L*    | A*    | B*    |
|-------|--------|-----|------------------|--------|------------|-------------|--------|--------|--------|-------|-------|-------|
| 514   | Male   | 87  | Ulna             | Fat    | 450        | 10          | 61,43  | 70,72  | 65,03  | 20,98 | 1,17  | 3,03  |
| 515   | Male   | 87  | Ulna             | Fat    | 450        | 10          | 66,94  | 74,94  | 68,82  | 21,98 | 0,54  | 7,26  |
| 516   | Male   | 87  | Ulna             | Fat    | 450        | 10          | 60,94  | 69,38  | 63,02  | 20,98 | 3,12  | 2,94  |
| 517   | Male   | 87  | Ulna             | Fat    | 450        | 20          | 62,94  | 71,01  | 65,95  | 22,98 | 0,09  | 3,05  |
| 518   | Male   | 87  | Ulna             | Fat    | 450        | 20          | 62,94  | 71,62  | 65,87  | 20,98 | 0,12  | 4,47  |
| 519   | Male   | 87  | Ulna             | Fat    | 450        | 20          | 62,94  | 70,99  | 65,53  | 28,98 | 1,13  | 6,25  |
| 520   | Male   | 87  | Ulna             | Fat    | 450        | 30          | 54,95  | 63,58  | 57,93  | 21,98 | 0,77  | 5,91  |
| 521   | Male   | 87  | Ulna             | Fat    | 450        | 20          | 58,95  | 67,51  | 61,77  | 23,98 | 0,35  | 3,15  |
| 522   | Male   | 87  | Ulna             | Fat    | 450        | 30          | 53,85  | 62,72  | 56,93  | 19,98 | 3,42  | 4,55  |
| 523   | Female | 65  | Radius           | Air    | 500        | 10          | 65,68  | 68,16  | 59,96  | 24,89 | 1,64  | 4,93  |
| 524   | Female | 65  | Radius           | Air    | 500        | 10          | 67,06  | 69,56  | 60,95  | 24,55 | 1,79  | 5,01  |
| 525   | Female | 65  | Radius           | Air    | 500        | 20          | 91,52  | 90,92  | 80,51  | 32,67 | 2,48  | 6,07  |
| 526   | Female | 65  | Radius           | Air    | 500        | 20          | 95,26  | 95,21  | 84,89  | 34,25 | 2,09  | 5,75  |
| 527   | Female | 65  | Radius           | Air    | 500        | 30          | 151,08 | 140,95 | 125,31 | 26,39 | 5,18  | 4,74  |
| 528   | Female | 65  | Radius           | Air    | 500        | 30          | 135,46 | 127,83 | 113,05 | 50,53 | 4,39  | 9,55  |
| 529   | Female | 65  | Radius           | Air    | 600        | 10          | 79,61  | 83,29  | 75,00  | 28,96 | 1,27  | 4,38  |
| 530   | Female | 65  | Radius           | Air    | 600        | 10          | 83,42  | 84,63  | 75,33  | 30,27 | 2,08  | 5,35  |
| 531   | Female | 65  | Radius           | Air    | 700        | 30          | 244,38 | 250,64 | 241,95 | 95,04 | 0,09  | 3,97  |
| 532   | Female | 65  | Radius           | Air    | 700        | 30          | 244,45 | 251,33 | 243,34 | 94,40 | -0,01 | 3,60  |
| 533   | Female | 65  | Radius           | Air    | 600        | 20          | 77,42  | 81,48  | 73,35  | 29,80 | 1,12  | 4,08  |
| 534   | Female | 65  | Radius           | Air    | 600        | 20          | 101,07 | 102,26 | 92,71  | 38,84 | 2,14  | 5,54  |
| 535   | Female | 65  | Radius           | Air    | 600        | 30          | 104,29 | 105,90 | 96,79  | 38,07 | 1,95  | 5,08  |
| 536   | Female | 65  | Radius           | Air    | 600        | 30          | 104,64 | 105,51 | 95,71  | 38,86 | 2,11  | 5,60  |
| 537   | Female | 65  | Radius           | Air    | 700        | 10          | 131,06 | 135,58 | 127,48 | 51,85 | 0,97  | 4,06  |
| 538   | Female | 65  | Radius           | Air    | 700        | 10          | 137,77 | 139,75 | 130,13 | 55,04 | 1,58  | 5,47  |
| 539   | Female | 65  | Radius           | Air    | 700        | 20          | 214,04 | 220,95 | 213,01 | 83,75 | 0,07  | 3,80  |
| 540   | Female | 65  | Radius           | Air    | 700        | 20          | 214,25 | 221,19 | 212,96 | 83,97 | -0,03 | 3,89  |
| 541   | Female | 65  | Radius           | Air    | 800        | 10          | 225,54 | 227,27 | 214,77 | 88,82 | 0,90  | 6,20  |
| 542   | Female | 65  | Radius           | Air    | 800        | 10          | 227,39 | 230,54 | 219,15 | 89,10 | 0,82  | 6,00  |
| 543   | Female | 65  | Radius           | Air    | 800        | 20          | 228,67 | 228,24 | 212,98 | 93,03 | 0,92  | 6,60  |
| 544   | Female | 65  | Radius           | Air    | 800        | 20          | 229,59 | 231,17 | 218,43 | 92,01 | 0,80  | 6,08  |
| 545   | Female | 65  | Radius           | Air    | 900        | 10          | 245,10 | 248,27 | 237,38 | 93,41 | 0,68  | 5,32  |
| 546   | Female | 65  | Radius           | Air    | 900        | 10          | 248,16 | 253,17 | 243,70 | 96,01 | 0,43  | 4,85  |
| 547   | Female | 65  | Radius           | Air    | 0          | 0           | 176,83 | 135,00 | 107,30 | 60,41 | 13,19 | 19,65 |
| 548   | Female | 65  | Radius           | Air    | 0          | 0           | 179,19 | 142,11 | 114,51 | 61,40 | 11,98 | 19,51 |
| 549   | Female | 65  | Radius           | Air    | 100        | 10          | 166,56 | 127,30 | 101,01 | 53,33 | 14,53 | 20,55 |
| 550   | Female | 65  | Radius           | Air    | 100        | 10          | 167,25 | 133,93 | 108,01 | 53,22 | 15,72 | 21,30 |
| 551   | Female | 65  | Radius           | Air    | 100        | 20          | 165,14 | 134,89 | 108,38 | 54,53 | 12,00 | 19,61 |
| 552   | Female | 65  | Radius           | Air    | 100        | 20          | 166,21 | 136,00 | 109,41 | 55,18 | 3,33  | 19,78 |
| 553   | Female | 65  | Radius           | Air    | 100        | 30          | 164,11 | 138,70 | 110,99 | 55,74 | 9,51  | 19,17 |
| 554   | Female | 65  | Radius           | Air    | 100        | 30          | 167,80 | 140,45 | 113,70 | 56,31 | 10,55 | 19,09 |
| 555   | Female | 65  | Radius           | Air    | 150        | 10          | 174,88 | 153,52 | 123,30 | 60,45 | 7,50  | 19,88 |
| 556   | Female | 65  | Radius           | Air    | 150        | 10          | 180,77 | 159,95 | 131,84 | 62,37 | 7,65  | 18,79 |

**Table s9. Raw data of the learning set (14/20)**

| ID nr | Sex    | Age | Skeletal element | Medium | Temp. (°C) | Time (min.) | R      | G      | B      | L*    | A*    | B*    |
|-------|--------|-----|------------------|--------|------------|-------------|--------|--------|--------|-------|-------|-------|
| 557   | Female | 65  | Radius           | Air    | 150        | 20          | 169,14 | 149,78 | 121,22 | 59,87 | 6,56  | 17,99 |
| 558   | Female | 65  | Radius           | Air    | 150        | 20          | 169,20 | 149,96 | 123,19 | 59,64 | 6,98  | 17,67 |
| 559   | Female | 65  | Radius           | Air    | 150        | 30          | 177,16 | 156,86 | 128,19 | 62,28 | 6,95  | 18,59 |
| 560   | Female | 65  | Radius           | Air    | 150        | 30          | 182,99 | 163,90 | 134,45 | 64,40 | 6,33  | 18,49 |
| 561   | Female | 65  | Radius           | Air    | 200        | 10          | 178,35 | 162,96 | 135,38 | 64,29 | 5,03  | 17,05 |
| 562   | Female | 65  | Radius           | Air    | 200        | 10          | 180,35 | 164,51 | 136,96 | 64,99 | 5,28  | 17,16 |
| 563   | Female | 65  | Radius           | Air    | 200        | 20          | 169,13 | 154,06 | 126,37 | 60,54 | 5,02  | 17,20 |
| 564   | Female | 65  | Radius           | Air    | 200        | 20          | 170,82 | 154,13 | 126,35 | 60,63 | 5,77  | 17,78 |
| 565   | Female | 65  | Radius           | Air    | 200        | 30          | 169,28 | 143,20 | 111,19 | 58,95 | 8,62  | 21,30 |
| 566   | Female | 65  | Radius           | Air    | 200        | 30          | 173,53 | 148,72 | 116,59 | 60,55 | 8,47  | 21,52 |
| 567   | Female | 65  | Radius           | Air    | 250        | 10          | 179,77 | 158,00 | 127,25 | 62,68 | 7,35  | 19,98 |
| 568   | Female | 65  | Radius           | Air    | 250        | 10          | 181,04 | 159,73 | 129,03 | 63,39 | 7,07  | 19,69 |
| 569   | Female | 65  | Radius           | Air    | 250        | 20          | 169,75 | 128,72 | 94,16  | 53,93 | 15,59 | 26,19 |
| 570   | Female | 65  | Radius           | Air    | 250        | 20          | 171,85 | 132,62 | 98,36  | 54,30 | 14,85 | 25,23 |
| 571   | Female | 65  | Radius           | Air    | 250        | 30          | 126,88 | 88,42  | 64,31  | 37,31 | 17,38 | 21,20 |
| 572   | Female | 65  | Radius           | Air    | 250        | 30          | 129,58 | 86,53  | 61,91  | 37,66 | 19,51 | 22,89 |
| 573   | Female | 65  | Radius           | Air    | 300        | 10          | 135,10 | 94,00  | 67,71  | 40,71 | 18,01 | 23,16 |
| 574   | Female | 65  | Radius           | Air    | 300        | 10          | 146,12 | 107,38 | 77,90  | 45,45 | 15,85 | 23,69 |
| 575   | Female | 65  | Radius           | Air    | 300        | 20          | 56,10  | 54,97  | 46,44  | 18,99 | 4,02  | 5,73  |
| 576   | Female | 65  | Radius           | Air    | 300        | 20          | 62,39  | 60,48  | 51,52  | 21,37 | 3,99  | 5,95  |
| 577   | Female | 65  | Radius           | Air    | 300        | 30          | 57,49  | 61,07  | 52,91  | 20,87 | 1,40  | 4,34  |
| 578   | Female | 65  | Radius           | Air    | 300        | 30          | 63,13  | 67,78  | 59,86  | 24,69 | 0,98  | 4,01  |
| 579   | Female | 65  | Radius           | Air    | 350        | 10          | 56,37  | 62,81  | 55,30  | 21,49 | 0,32  | 3,52  |
| 580   | Female | 65  | Radius           | Air    | 350        | 10          | 63,25  | 67,69  | 59,37  | 23,72 | 1,08  | 4,39  |
| 581   | Female | 65  | Radius           | Air    | 350        | 20          | 59,23  | 66,25  | 58,51  | 22,15 | -0,03 | 3,52  |
| 582   | Female | 65  | Radius           | Air    | 350        | 20          | 61,39  | 69,81  | 62,76  | 24,44 | -0,41 | 2,95  |
| 583   | Female | 65  | Radius           | Air    | 350        | 30          | 61,37  | 70,31  | 63,42  | 24,16 | -0,58 | 2,71  |
| 584   | Female | 65  | Radius           | Air    | 350        | 30          | 61,87  | 70,93  | 64,05  | 24,42 | -0,64 | 2,76  |
| 585   | Female | 65  | Radius           | Air    | 400        | 10          | 63,08  | 71,07  | 62,67  | 25,04 | -0,40 | 3,27  |
| 586   | Female | 65  | Radius           | Air    | 400        | 10          | 63,38  | 71,83  | 64,67  | 25,61 | -0,46 | 3,03  |
| 587   | Female | 65  | Radius           | Air    | 400        | 20          | 61,36  | 69,52  | 62,28  | 24,21 | -0,36 | 3,09  |
| 588   | Female | 65  | Radius           | Air    | 400        | 20          | 68,90  | 76,38  | 68,41  | 26,92 | -0,17 | 3,74  |
| 589   | Female | 65  | Radius           | Fat    | 100        | 10          | 168,70 | 140,67 | 114,13 | 56,95 | 11,48 | 19,79 |
| 590   | Female | 65  | Radius           | Fat    | 100        | 10          | 175,60 | 150,46 | 124,67 | 58,37 | 10,56 | 18,63 |
| 591   | Female | 65  | Radius           | Fat    | 100        | 20          | 157,47 | 130,17 | 105,85 | 49,84 | 13,27 | 18,91 |
| 592   | Female | 65  | Radius           | Fat    | 100        | 20          | 159,28 | 133,96 | 110,42 | 51,09 | 12,44 | 18,21 |
| 593   | Female | 65  | Radius           | Fat    | 100        | 30          | 164,96 | 141,41 | 114,04 | 56,58 | 8,87  | 18,74 |
| 594   | Female | 65  | Radius           | Fat    | 100        | 30          | 168,75 | 147,28 | 121,30 | 58,09 | 8,36  | 17,80 |
| 595   | Female | 65  | Radius           | Fat    | 150        | 10          | 162,74 | 139,78 | 115,97 | 54,84 | 9,70  | 17,08 |
| 596   | Female | 65  | Radius           | Fat    | 150        | 10          | 166,40 | 143,64 | 118,58 | 55,07 | 9,87  | 17,90 |
| 597   | Female | 65  | Radius           | Fat    | 150        | 20          | 168,75 | 147,28 | 121,30 | 67,31 | 5,90  | 17,96 |
| 598   | Female | 65  | Radius           | Fat    | 150        | 20          | 185,10 | 166,83 | 138,16 | 64,00 | 7,01  | 18,96 |
| 599   | Female | 65  | Radius           | Fat    | 150        | 30          | 181,05 | 161,76 | 133,52 | 63,47 | 6,76  | 18,08 |

**Table s9. Raw data of the learning set (15/20)**

| ID nr | Sex    | Age | Skeletal element | Medium | Temp. (°C) | Time (min.) | R      | G      | B      | L*    | A*    | B*    |
|-------|--------|-----|------------------|--------|------------|-------------|--------|--------|--------|-------|-------|-------|
| 600   | Female | 65  | Radius           | Fat    | 150        | 30          | 183,65 | 165,61 | 137,95 | 65,99 | 5,96  | 17,65 |
| 601   | Female | 65  | Radius           | Fat    | 200        | 10          | 176,73 | 158,15 | 131,37 | 61,81 | 6,92  | 17,51 |
| 602   | Female | 65  | Radius           | Fat    | 200        | 10          | 176,80 | 157,36 | 129,87 | 60,82 | 7,59  | 18,28 |
| 603   | Female | 65  | Radius           | Fat    | 200        | 20          | 182,10 | 167,17 | 141,94 | 64,53 | 5,88  | 16,14 |
| 604   | Female | 65  | Radius           | Fat    | 200        | 20          | 184,41 | 169,85 | 144,21 | 65,90 | 5,23  | 15,99 |
| 605   | Female | 65  | Radius           | Fat    | 200        | 30          | 172,64 | 155,92 | 130,08 | 61,04 | 6,11  | 16,55 |
| 606   | Female | 65  | Radius           | Fat    | 200        | 30          | 179,67 | 163,52 | 137,60 | 62,84 | 6,53  | 17,06 |
| 607   | Female | 65  | Radius           | Fat    | 250        | 10          | 162,48 | 146,85 | 121,78 | 57,11 | 6,02  | 16,22 |
| 608   | Female | 65  | Radius           | Fat    | 250        | 10          | 168,69 | 154,84 | 130,08 | 61,01 | 1,42  | 15,40 |
| 609   | Female | 65  | Radius           | Fat    | 250        | 20          | 179,95 | 159,49 | 129,61 | 62,29 | 6,71  | 18,95 |
| 610   | Female | 65  | Radius           | Fat    | 250        | 20          | 180,28 | 160,18 | 130,47 | 63,11 | 7,14  | 19,39 |
| 611   | Female | 65  | Radius           | Fat    | 250        | 30          | 171,11 | 132,48 | 99,53  | 54,68 | 14,47 | 24,39 |
| 612   | Female | 65  | Radius           | Fat    | 250        | 30          | 172,11 | 134,81 | 101,53 | 55,68 | 13,79 | 24,25 |
| 613   | Female | 65  | Radius           | Fat    | 300        | 10          | 176,66 | 158,00 | 130,58 | 60,30 | 7,45  | 18,38 |
| 614   | Female | 65  | Radius           | Fat    | 300        | 10          | 181,43 | 162,28 | 133,94 | 64,87 | 0,39  | 18,11 |
| 615   | Female | 65  | Radius           | Fat    | 300        | 20          | 122,56 | 91,22  | 69,84  | 37,57 | 14,35 | 18,38 |
| 616   | Female | 65  | Radius           | Fat    | 300        | 20          | 125,24 | 93,18  | 71,21  | 38,27 | 14,29 | 18,56 |
| 617   | Female | 65  | Radius           | Fat    | 300        | 30          | 89,03  | 75,42  | 60,13  | 29,75 | 8,40  | 12,29 |
| 618   | Female | 65  | Radius           | Fat    | 300        | 30          | 90,74  | 77,32  | 62,94  | 30,21 | 8,47  | 11,78 |
| 619   | Female | 65  | Radius           | Fat    | 350        | 10          | 178,34 | 147,20 | 114,25 | 59,39 | 10,99 | 22,61 |
| 620   | Female | 65  | Radius           | Fat    | 350        | 10          | 178,58 | 147,43 | 114,40 | 59,83 | 10,95 | 22,81 |
| 621   | Female | 65  | Radius           | Fat    | 350        | 20          | 57,21  | 64,63  | 57,51  | 22,29 | 0,08  | 3,22  |
| 622   | Female | 65  | Radius           | Fat    | 350        | 20          | 57,96  | 64,75  | 57,32  | 22,47 | 0,24  | 3,42  |
| 623   | Female | 65  | Radius           | Fat    | 350        | 30          | 58,58  | 65,35  | 57,92  | 22,30 | 0,31  | 3,51  |
| 624   | Female | 65  | Radius           | Fat    | 350        | 30          | 61,57  | 65,82  | 57,33  | 23,21 | 1,03  | 4,48  |
| 625   | Female | 65  | Radius           | Fat    | 400        | 10          | 57,05  | 61,97  | 54,06  | 21,26 | 0,93  | 4,06  |
| 626   | Female | 65  | Radius           | Fat    | 400        | 10          | 58,05  | 64,10  | 56,54  | 21,96 | 0,68  | 3,78  |
| 627   | Female | 65  | Radius           | Fat    | 400        | 20          | 51,69  | 60,34  | 53,87  | 19,67 | -0,32 | 2,59  |
| 628   | Female | 65  | Radius           | Fat    | 400        | 20          | 58,45  | 66,75  | 56,67  | 22,85 | -0,20 | 2,81  |
| 629   | Female | 65  | Radius           | Air    | 0          | 0           | 142,99 | 117,49 | 93,90  | 47,74 | 10,51 | 17,32 |
| 630   | Female | 65  | Radius           | Air    | 0          | 0           | 146,04 | 121,74 | 97,28  | 49,38 | 9,81  | 17,82 |
| 631   | Female | 65  | Radius           | Air    | 100        | 30          | 147,10 | 130,91 | 106,41 | 52,08 | 6,16  | 16,18 |
| 632   | Female | 65  | Radius           | Air    | 100        | 30          | 150,90 | 134,95 | 110,49 | 53,48 | 6,17  | 15,92 |
| 633   | Female | 65  | Radius           | Air    | 200        | 30          | 166,61 | 141,68 | 110,77 | 57,47 | 8,45  | 20,39 |
| 634   | Female | 65  | Radius           | Air    | 200        | 30          | 166,86 | 142,59 | 112,08 | 58,04 | 8,21  | 20,16 |
| 635   | Female | 65  | Radius           | Air    | 250        | 30          | 130,85 | 91,65  | 68,38  | 40,20 | 17,15 | 20,91 |
| 636   | Female | 65  | Radius           | Air    | 250        | 30          | 127,54 | 91,14  | 68,97  | 39,70 | 16,64 | 20,28 |
| 637   | Female | 65  | Radius           | Air    | 300        | 30          | 61,25  | 64,58  | 56,65  | 23,91 | 1,88  | 4,48  |
| 638   | Female | 65  | Radius           | Air    | 300        | 30          | 64,67  | 68,69  | 60,72  | 24,60 | 1,41  | 4,27  |
| 639   | Female | 65  | Radius           | Air    | 350        | 30          | 67,94  | 75,89  | 68,63  | 27,47 | -0,26 | 3,11  |
| 640   | Female | 65  | Radius           | Air    | 350        | 30          | 68,45  | 76,01  | 68,70  | 27,41 | 0,05  | 3,26  |
| 641   | Female | 65  | Radius           | Air    | 400        | 20          | 73,57  | 80,64  | 72,91  | 29,48 | 0,04  | 3,61  |
| 642   | Female | 65  | Radius           | Air    | 400        | 20          | 73,78  | 80,36  | 72,36  | 30,14 | 0,12  | 3,78  |

**Table s9. Raw data of the learning set (16/20)**

| ID nr | Sex    | Age | Skeletal element | Medium | Temp. (°C) | Time (min.) | R      | G      | B      | L*    | A*    | B*    |
|-------|--------|-----|------------------|--------|------------|-------------|--------|--------|--------|-------|-------|-------|
| 643   | Female | 65  | Radius           | Air    | 450        | 30          | 102,31 | 99,71  | 88,86  | 38,95 | 3,27  | 6,78  |
| 644   | Female | 65  | Radius           | Air    | 450        | 30          | 122,76 | 115,30 | 101,90 | 45,32 | 4,88  | 9,03  |
| 645   | Female | 65  | Radius           | Fat    | 100        | 30          | 147,13 | 129,11 | 104,82 | 52,23 | 6,78  | 16,16 |
| 646   | Female | 65  | Radius           | Fat    | 100        | 30          | 148,13 | 129,55 | 105,19 | 51,53 | 7,29  | 16,40 |
| 647   | Female | 65  | Radius           | Fat    | 200        | 30          | 142,52 | 125,82 | 101,97 | 50,82 | 6,65  | 16,01 |
| 648   | Female | 65  | Radius           | Fat    | 200        | 30          | 145,37 | 125,58 | 101,25 | 54,80 | 7,09  | 16,43 |
| 649   | Female | 65  | Radius           | Fat    | 250        | 30          | 149,83 | 114,02 | 84,47  | 57,63 | 9,40  | 20,17 |
| 650   | Female | 65  | Radius           | Fat    | 250        | 30          | 152,23 | 114,55 | 84,31  | 47,69 | 14,92 | 23,33 |
| 651   | Female | 65  | Radius           | Fat    | 300        | 30          | 55,81  | 60,74  | 52,56  | 47,33 | 14,09 | 22,52 |
| 652   | Female | 65  | Radius           | Fat    | 300        | 30          | 57,69  | 61,10  | 52,46  | 21,31 | 1,37  | 4,71  |
| 653   | Female | 65  | Radius           | Fat    | 350        | 30          | 50,46  | 57,79  | 50,96  | 19,21 | 0,41  | 2,96  |
| 654   | Female | 65  | Radius           | Fat    | 350        | 30          | 52,05  | 59,62  | 52,69  | 21,33 | 0,97  | 3,92  |
| 655   | Female | 65  | Radius           | Fat    | 400        | 20          | 53,80  | 61,88  | 55,13  | 18,19 | -0,05 | 3,88  |
| 656   | Female | 65  | Radius           | Fat    | 400        | 20          | 56,45  | 63,98  | 57,08  | 22,93 | 0,15  | 2,91  |
| 657   | Female | 65  | Radius           | Fat    | 450        | 30          | 132,78 | 129,64 | 118,14 | 51,03 | 3,01  | 6,86  |
| 658   | Female | 65  | Radius           | Fat    | 450        | 30          | 135,16 | 129,66 | 116,99 | 49,78 | 4,13  | 8,27  |
| 659   | Female | 65  | Ulna             | Air    | 500        | 10          | 55,24  | 62,34  | 54,72  | 20,91 | 0,16  | 3,53  |
| 660   | Female | 65  | Ulna             | Air    | 500        | 10          | 58,64  | 65,39  | 57,93  | 22,18 | 0,24  | 3,45  |
| 661   | Female | 65  | Ulna             | Air    | 500        | 20          | 77,94  | 75,18  | 64,96  | 27,61 | 3,56  | 6,80  |
| 662   | Female | 65  | Ulna             | Air    | 500        | 20          | 123,97 | 114,30 | 99,54  | 22,47 | 6,38  | 6,11  |
| 663   | Female | 65  | Ulna             | Air    | 500        | 30          | 121,86 | 114,03 | 100,02 | 44,48 | 4,77  | 9,30  |
| 664   | Female | 65  | Ulna             | Air    | 500        | 30          | 130,44 | 122,38 | 108,52 | 47,52 | 4,82  | 9,21  |
| 665   | Female | 65  | Ulna             | Air    | 600        | 10          | 84,21  | 85,07  | 75,40  | 31,33 | 2,24  | 5,53  |
| 666   | Female | 65  | Ulna             | Air    | 600        | 10          | 93,41  | 91,26  | 80,60  | 33,45 | 3,11  | 6,55  |
| 667   | Female | 65  | Ulna             | Air    | 700        | 30          | 238,72 | 248,91 | 243,22 | 93,80 | -0,62 | 2,36  |
| 668   | Female | 65  | Ulna             | Air    | 700        | 30          | 227,57 | 234,55 | 227,14 | 88,43 | 0,12  | 3,43  |
| 669   | Female | 65  | Ulna             | Air    | 600        | 20          | 90,17  | 91,65  | 82,36  | 32,30 | 1,86  | 4,96  |
| 670   | Female | 65  | Ulna             | Air    | 600        | 20          | 90,51  | 90,39  | 80,55  | 32,36 | 2,52  | 5,81  |
| 671   | Female | 65  | Ulna             | Air    | 600        | 30          | 92,29  | 94,63  | 85,69  | 35,00 | 1,70  | 5,00  |
| 672   | Female | 65  | Ulna             | Air    | 600        | 30          | 94,27  | 95,77  | 86,38  | 35,26 | 1,96  | 5,30  |
| 673   | Female | 65  | Ulna             | Air    | 700        | 10          | 100,06 | 103,70 | 95,32  | 39,09 | 1,22  | 4,38  |
| 674   | Female | 65  | Ulna             | Air    | 700        | 10          | 112,62 | 115,09 | 105,87 | 43,35 | 1,61  | 5,19  |
| 675   | Female | 65  | Ulna             | Air    | 700        | 20          | 198,01 | 204,18 | 196,88 | 77,86 | 0,47  | 3,82  |
| 676   | Female | 65  | Ulna             | Air    | 700        | 20          | 217,04 | 225,53 | 219,13 | 86,29 | -0,20 | 2,90  |
| 677   | Female | 65  | Ulna             | Air    | 800        | 10          | 247,33 | 253,68 | 245,04 | 95,82 | 0,02  | 4,05  |
| 678   | Female | 65  | Ulna             | Air    | 800        | 10          | 248,72 | 255,19 | 246,78 | 96,04 | 0,08  | 3,90  |
| 679   | Female | 65  | Ulna             | Air    | 800        | 20          | 250,51 | 256,78 | 248,40 | 97,06 | 0,12  | 4,05  |
| 680   | Female | 65  | Ulna             | Air    | 800        | 20          | 248,81 | 255,00 | 245,77 | 96,80 | 0,11  | 4,62  |
| 681   | Female | 65  | Ulna             | Air    | 900        | 10          | 247,03 | 252,88 | 244,35 | 95,24 | 0,23  | 3,95  |
| 682   | Female | 65  | Ulna             | Air    | 900        | 10          | 249,55 | 256,23 | 247,99 | 96,33 | 0,04  | 3,86  |
| 683   | Female | 65  | Ulna             | Air    | 0          | 0           | 167,53 | 136,74 | 114,00 | 54,53 | 14,08 | 18,44 |
| 684   | Female | 65  | Ulna             | Fat    | 0          | 0           | 164,06 | 129,00 | 104,91 | 53,15 | 14,37 | 19,41 |
| 685   | Female | 65  | Ulna             | Air    | 100        | 10          | 176,65 | 149,01 | 120,48 | 59,53 | 10,46 | 19,96 |

**Table s9. Raw data of the learning set (17/20)**

| ID nr | Sex    | Age | Skeletal element | Medium | Temp. (°C) | Time (min.) | R      | G      | B      | L*    | A*    | B*    |
|-------|--------|-----|------------------|--------|------------|-------------|--------|--------|--------|-------|-------|-------|
| 686   | Female | 65  | Ulna             | Air    | 100        | 10          | 182,75 | 156,61 | 129,33 | 61,58 | 10,33 | 19,56 |
| 687   | Female | 65  | Ulna             | Air    | 100        | 20          | 168,52 | 143,15 | 116,11 | 56,71 | 10,20 | 19,28 |
| 688   | Female | 65  | Ulna             | Air    | 100        | 20          | 173,74 | 149,66 | 123,96 | 60,14 | 9,20  | 17,80 |
| 689   | Female | 65  | Ulna             | Air    | 100        | 30          | 163,21 | 138,36 | 110,53 | 53,46 | 9,90  | 19,67 |
| 690   | Female | 65  | Ulna             | Air    | 100        | 30          | 167,41 | 144,69 | 119,38 | 56,51 | 9,53  | 18,37 |
| 691   | Female | 65  | Ulna             | Air    | 150        | 10          | 173,69 | 149,91 | 119,89 | 59,62 | 8,48  | 20,06 |
| 692   | Female | 65  | Ulna             | Air    | 150        | 10          | 178,78 | 156,65 | 128,04 | 60,90 | 8,23  | 19,31 |
| 693   | Female | 65  | Ulna             | Air    | 150        | 20          | 171,31 | 152,88 | 126,86 | 59,81 | 6,69  | 16,92 |
| 694   | Female | 65  | Ulna             | Air    | 150        | 20          | 173,06 | 155,07 | 128,87 | 60,50 | 6,79  | 17,60 |
| 695   | Female | 65  | Ulna             | Air    | 150        | 30          | 164,20 | 146,96 | 121,72 | 57,71 | 6,59  | 17,10 |
| 696   | Female | 65  | Ulna             | Air    | 150        | 30          | 164,43 | 148,75 | 123,59 | 58,32 | 5,87  | 16,51 |
| 697   | Female | 65  | Ulna             | Air    | 200        | 10          | 179,04 | 161,88 | 135,21 | 63,47 | 6,11  | 17,40 |
| 698   | Female | 65  | Ulna             | Air    | 200        | 10          | 179,68 | 164,12 | 137,78 | 64,41 | 5,38  | 16,50 |
| 699   | Female | 65  | Ulna             | Air    | 200        | 20          | 179,89 | 158,42 | 127,25 | 62,99 | 6,94  | 19,69 |
| 700   | Female | 65  | Ulna             | Air    | 200        | 20          | 183,56 | 162,45 | 131,82 | 64,81 | 6,36  | 18,73 |
| 701   | Female | 65  | Ulna             | Air    | 200        | 30          | 169,77 | 148,68 | 118,23 | 59,89 | 6,73  | 19,38 |
| 702   | Female | 65  | Ulna             | Air    | 200        | 30          | 172,56 | 151,55 | 121,44 | 60,50 | 6,96  | 19,43 |
| 703   | Female | 65  | Ulna             | Air    | 250        | 10          | 176,30 | 155,10 | 125,25 | 61,94 | 6,93  | 18,97 |
| 704   | Female | 65  | Ulna             | Air    | 250        | 10          | 180,30 | 160,00 | 130,58 | 64,06 | 6,62  | 18,62 |
| 705   | Female | 65  | Ulna             | Air    | 250        | 20          | 150,76 | 113,95 | 81,90  | 47,35 | 14,08 | 24,20 |
| 706   | Female | 65  | Ulna             | Air    | 250        | 20          | 153,33 | 113,98 | 85,02  | 46,25 | 15,56 | 22,61 |
| 707   | Female | 65  | Ulna             | Air    | 250        | 30          | 111,10 | 79,94  | 61,92  | 37,55 | 17,13 | 19,71 |
| 708   | Female | 65  | Ulna             | Air    | 250        | 30          | 119,91 | 84,78  | 64,83  | 35,84 | 16,75 | 18,64 |
| 709   | Female | 65  | Ulna             | Air    | 300        | 10          | 136,75 | 96,36  | 70,89  | 41,44 | 13,65 | 22,37 |
| 710   | Female | 65  | Ulna             | Air    | 300        | 10          | 137,39 | 97,04  | 70,12  | 42,78 | 17,27 | 23,58 |
| 711   | Female | 65  | Ulna             | Air    | 300        | 20          | 65,88  | 66,53  | 57,87  | 24,94 | 3,01  | 5,50  |
| 712   | Female | 65  | Ulna             | Air    | 300        | 20          | 70,40  | 67,49  | 58,07  | 24,29 | 3,93  | 6,16  |
| 713   | Female | 65  | Ulna             | Air    | 300        | 30          | 66,58  | 67,60  | 58,97  | 24,99 | 2,76  | 5,36  |
| 714   | Female | 65  | Ulna             | Air    | 300        | 30          | 66,98  | 67,31  | 58,85  | 24,03 | 2,78  | 5,09  |
| 715   | Female | 65  | Ulna             | Air    | 350        | 10          | 55,37  | 60,39  | 52,53  | 21,33 | 0,66  | 3,96  |
| 716   | Female | 65  | Ulna             | Air    | 350        | 10          | 56,91  | 62,29  | 54,30  | 20,62 | 0,90  | 4,00  |
| 717   | Female | 65  | Ulna             | Air    | 350        | 20          | 63,76  | 72,05  | 64,81  | 27,10 | -0,23 | 3,26  |
| 718   | Female | 65  | Ulna             | Air    | 350        | 20          | 67,61  | 75,36  | 67,89  | 25,66 | -0,43 | 3,06  |
| 719   | Female | 65  | Ulna             | Air    | 350        | 30          | 57,56  | 65,96  | 58,88  | 24,82 | -0,48 | 2,91  |
| 720   | Female | 65  | Ulna             | Air    | 350        | 30          | 62,51  | 71,18  | 64,12  | 23,28 | -0,41 | 2,97  |
| 721   | Female | 65  | Ulna             | Air    | 400        | 10          | 68,12  | 76,23  | 68,78  | 28,99 | 0,05  | 3,59  |
| 722   | Female | 65  | Ulna             | Air    | 400        | 10          | 72,14  | 79,09  | 71,35  | 27,44 | -0,41 | 3,21  |
| 723   | Female | 65  | Ulna             | Air    | 400        | 20          | 64,13  | 71,46  | 63,68  | 27,70 | -0,20 | 3,53  |
| 724   | Female | 65  | Ulna             | Air    | 400        | 20          | 69,26  | 76,71  | 68,86  | 25,70 | -0,14 | 3,55  |
| 725   | Female | 65  | Ulna             | Fat    | 100        | 10          | 159,84 | 134,08 | 107,18 | 56,29 | 8,43  | 18,45 |
| 726   | Female | 65  | Ulna             | Fat    | 100        | 10          | 164,00 | 141,81 | 114,85 | 54,00 | 9,30  | 18,52 |
| 727   | Female | 65  | Ulna             | Fat    | 100        | 20          | 175,94 | 150,44 | 122,20 | 60,42 | 9,10  | 19,13 |
| 728   | Female | 65  | Ulna             | Fat    | 100        | 20          | 179,25 | 155,40 | 128,65 | 63,11 | 8,18  | 17,76 |

**Table s9. Raw data of the learning set (18/20)**

| ID nr | Sex    | Age | Skeletal element | Medium | Temp. (°C) | Time (min.) | R      | G      | B      | L*    | A*    | B*    |
|-------|--------|-----|------------------|--------|------------|-------------|--------|--------|--------|-------|-------|-------|
| 729   | Female | 65  | Ulna             | Fat    | 100        | 30          | 152,28 | 128,95 | 103,71 | 52,27 | 8,54  | 17,25 |
| 730   | Female | 65  | Ulna             | Fat    | 100        | 30          | 156,41 | 134,87 | 110,52 | 54,19 | 8,14  | 16,65 |
| 731   | Female | 65  | Ulna             | Fat    | 150        | 10          | 175,36 | 150,44 | 123,00 | 61,54 | 8,17  | 18,11 |
| 732   | Female | 65  | Ulna             | Fat    | 150        | 10          | 176,42 | 153,28 | 126,37 | 62,55 | 7,36  | 17,45 |
| 733   | Female | 65  | Ulna             | Fat    | 150        | 20          | 180,22 | 160,42 | 132,55 | 64,03 | 6,42  | 17,63 |
| 734   | Female | 65  | Ulna             | Fat    | 150        | 20          | 180,25 | 159,72 | 132,10 | 64,61 | 6,41  | 17,34 |
| 735   | Female | 65  | Ulna             | Fat    | 150        | 30          | 177,74 | 154,75 | 126,01 | 62,88 | 7,48  | 18,60 |
| 736   | Female | 65  | Ulna             | Fat    | 150        | 30          | 181,51 | 161,14 | 133,13 | 64,04 | 6,42  | 17,44 |
| 737   | Female | 65  | Ulna             | Fat    | 200        | 10          | 174,52 | 157,69 | 131,15 | 63,95 | 5,17  | 16,44 |
| 738   | Female | 65  | Ulna             | Fat    | 200        | 10          | 175,52 | 158,10 | 130,75 | 64,04 | 5,22  | 16,86 |
| 739   | Female | 65  | Ulna             | Fat    | 200        | 20          | 164,62 | 148,12 | 123,02 | 58,56 | 5,99  | 16,07 |
| 740   | Female | 65  | Ulna             | Fat    | 200        | 20          | 174,22 | 157,50 | 132,16 | 62,24 | 6,40  | 16,81 |
| 741   | Female | 65  | Ulna             | Fat    | 200        | 30          | 181,02 | 161,36 | 134,38 | 64,06 | 6,47  | 17,00 |
| 742   | Female | 65  | Ulna             | Fat    | 200        | 30          | 183,47 | 162,76 | 135,09 | 64,50 | 7,29  | 18,10 |
| 743   | Female | 65  | Ulna             | Fat    | 250        | 10          | 168,99 | 150,74 | 123,87 | 60,01 | 6,39  | 17,32 |
| 744   | Female | 65  | Ulna             | Fat    | 250        | 20          | 164,52 | 143,22 | 114,99 | 56,33 | 7,70  | 18,53 |
| 745   | Female | 65  | Ulna             | Fat    | 250        | 20          | 169,10 | 146,42 | 117,65 | 58,79 | 8,08  | 19,29 |
| 746   | Female | 65  | Ulna             | Fat    | 250        | 30          | 160,57 | 121,35 | 89,83  | 50,86 | 15,24 | 24,32 |
| 747   | Female | 65  | Ulna             | Fat    | 250        | 30          | 161,98 | 122,61 | 90,40  | 51,83 | 15,16 | 24,91 |
| 748   | Female | 65  | Ulna             | Fat    | 300        | 10          | 176,04 | 157,81 | 131,94 | 62,71 | 6,47  | 16,77 |
| 749   | Female | 65  | Ulna             | Fat    | 300        | 10          | 183,55 | 165,09 | 137,97 | 65,15 | 6,14  | 17,02 |
| 750   | Female | 65  | Ulna             | Fat    | 300        | 20          | 107,68 | 80,57  | 62,74  | 32,75 | 12,19 | 15,48 |
| 751   | Female | 65  | Ulna             | Fat    | 300        | 20          | 119,73 | 88,38  | 66,45  | 36,77 | 14,32 | 18,65 |
| 752   | Female | 65  | Ulna             | Fat    | 300        | 30          | 61,90  | 62,55  | 53,73  | 22,02 | 2,42  | 5,15  |
| 753   | Female | 65  | Ulna             | Fat    | 300        | 30          | 65,28  | 65,89  | 56,97  | 23,42 | 2,53  | 5,34  |
| 754   | Female | 65  | Ulna             | Fat    | 350        | 10          | 126,41 | 92,52  | 71,14  | 38,31 | 15,29 | 18,52 |
| 755   | Female | 65  | Ulna             | Fat    | 350        | 10          | 128,19 | 92,51  | 70,31  | 39,03 | 15,99 | 19,38 |
| 756   | Female | 65  | Ulna             | Fat    | 350        | 20          | 56,11  | 63,41  | 56,30  | 21,64 | 0,02  | 3,11  |
| 757   | Female | 65  | Ulna             | Fat    | 350        | 20          | 56,57  | 64,18  | 55,12  | 22,37 | -0,05 | 3,09  |
| 758   | Female | 65  | Ulna             | Fat    | 350        | 30          | 49,99  | 57,19  | 49,90  | 18,55 | -0,04 | 3,12  |
| 759   | Female | 65  | Ulna             | Fat    | 350        | 30          | 55,68  | 62,76  | 55,48  | 21,29 | 0,11  | 3,28  |
| 760   | Female | 65  | Ulna             | Fat    | 400        | 10          | 58,64  | 65,60  | 58,45  | 22,62 | 0,22  | 3,24  |
| 761   | Female | 65  | Ulna             | Fat    | 400        | 10          | 59,76  | 65,79  | 58,24  | 22,55 | 0,38  | 3,51  |
| 762   | Female | 65  | Ulna             | Fat    | 400        | 20          | 52,46  | 61,03  | 54,52  | 20,46 | -0,38 | 2,52  |
| 763   | Female | 65  | Ulna             | Fat    | 400        | 20          | 55,27  | 63,78  | 57,22  | 21,72 | -0,34 | 2,59  |
| 764   | Female | 65  | Ulna             | Fat    | 0          | 0           | 179,09 | 156,11 | 125,98 | 62,26 | 7,70  | 19,41 |
| 765   | Female | 65  | Ulna             | Fat    | 0          | 0           | 187,24 | 165,21 | 135,59 | 65,11 | 7,56  | 19,16 |
| 766   | Female | 65  | Ulna             | Air    | 100        | 30          | 174,76 | 153,33 | 124,47 | 61,04 | 7,35  | 18,76 |
| 767   | Female | 65  | Ulna             | Air    | 100        | 30          | 177,52 | 155,10 | 126,03 | 62,03 | 7,63  | 19,38 |
| 768   | Female | 65  | Ulna             | Air    | 200        | 30          | 180,75 | 145,82 | 112,49 | 60,47 | 11,91 | 23,03 |
| 769   | Female | 65  | Ulna             | Air    | 200        | 30          | 191,76 | 159,99 | 125,84 | 64,81 | 10,90 | 23,29 |
| 770   | Female | 65  | Ulna             | Air    | 250        | 30          | 129,65 | 90,44  | 67,45  | 38,61 | 17,43 | 20,46 |
| 771   | Female | 65  | Ulna             | Air    | 250        | 30          | 131,76 | 92,87  | 69,99  | 39,90 | 17,43 | 20,62 |

**Table s9. Raw data of the learning set (19/20)**

| ID nr | Sex    | Age | Skeletal element | Medium | Temp. (°C) | Time (min.) | R      | G      | B      | L*    | A*    | B*    |
|-------|--------|-----|------------------|--------|------------|-------------|--------|--------|--------|-------|-------|-------|
| 772   | Female | 65  | Ulna             | Air    | 300        | 30          | 61,48  | 63,04  | 54,40  | 22,44 | 2,31  | 5,11  |
| 773   | Female | 65  | Ulna             | Air    | 300        | 30          | 64,06  | 66,94  | 58,68  | 24,22 | 1,94  | 4,76  |
| 774   | Female | 65  | Ulna             | Air    | 350        | 30          | 65,53  | 73,83  | 66,57  | 26,89 | -0,22 | 3,18  |
| 775   | Female | 65  | Ulna             | Air    | 350        | 30          | 65,57  | 73,45  | 65,97  | 26,41 | -0,11 | 4,47  |
| 776   | Female | 65  | Ulna             | Air    | 400        | 20          | 58,37  | 66,41  | 59,37  | 23,44 | -0,13 | 3,06  |
| 777   | Female | 65  | Ulna             | Air    | 400        | 20          | 64,06  | 71,70  | 63,98  | 25,36 | -0,16 | 3,49  |
| 778   | Female | 65  | Ulna             | Air    | 450        | 30          | 103,28 | 100,34 | 89,26  | 38,98 | 3,48  | 7,03  |
| 779   | Female | 65  | Ulna             | Air    | 450        | 30          | 115,67 | 111,16 | 99,43  | 42,97 | 3,82  | 7,54  |
| 780   | Female | 65  | Ulna             | Fat    | 100        | 30          | 157,70 | 129,89 | 100,76 | 52,71 | 10,47 | 20,57 |
| 781   | Female | 65  | Ulna             | Fat    | 100        | 30          | 158,68 | 131,22 | 101,65 | 53,44 | 10,20 | 20,83 |
| 782   | Female | 65  | Ulna             | Fat    | 200        | 30          | 177,53 | 154,07 | 124,65 | 61,31 | 7,95  | 19,11 |
| 783   | Female | 65  | Ulna             | Fat    | 200        | 30          | 177,68 | 153,99 | 124,15 | 61,77 | 7,98  | 19,60 |
| 784   | Female | 65  | Ulna             | Fat    | 250        | 30          | 150,20 | 114,93 | 85,60  | 47,37 | 14,33 | 22,63 |
| 785   | Female | 65  | Ulna             | Fat    | 250        | 30          | 157,04 | 119,04 | 88,09  | 49,61 | 14,96 | 23,70 |
| 786   | Female | 65  | Ulna             | Fat    | 300        | 30          | 53,55  | 58,27  | 50,39  | 21,52 | 0,93  | 3,96  |
| 787   | Female | 65  | Ulna             | Fat    | 300        | 30          | 58,90  | 62,84  | 54,77  | 22,01 | 1,11  | 4,14  |
| 788   | Female | 65  | Ulna             | Fat    | 350        | 30          | 47,21  | 54,87  | 47,82  | 18,10 | -0,06 | 3,04  |
| 789   | Female | 65  | Ulna             | Fat    | 350        | 30          | 51,25  | 58,99  | 52,00  | 19,78 | -0,14 | 2,97  |
| 790   | Female | 65  | Ulna             | Fat    | 400        | 20          | 44,92  | 52,89  | 46,10  | 16,09 | 0,04  | 2,80  |
| 791   | Female | 65  | Ulna             | Fat    | 400        | 20          | 47,95  | 55,87  | 49,29  | 18,29 | 0,09  | 2,69  |
| 792   | Female | 65  | Ulna             | Fat    | 450        | 30          | 136,32 | 132,01 | 119,75 | 51,51 | 3,47  | 7,60  |
| 793   | Female | 65  | Ulna             | Fat    | 450        | 30          | 131,17 | 129,52 | 119,01 | 50,23 | 2,93  | 6,23  |
| 794   | Female | 54  | Ulna             | Fat    | 0          | 0           | 163,67 | 108,50 | 112,17 | 50,64 | 17,15 | 17,76 |
| 795   | Female | 54  | Ulna             | Air    | 0          | 0           | 160,17 | 123,00 | 102,34 | 49,97 | 15,29 | 21,74 |
| 796   | Female | 54  | Radius           | Fat    | 0          | 0           | 160,17 | 118,50 | 108,34 | 49,06 | 18,88 | 17,38 |
| 797   | Female | 54  | Radius           | Fat    | 0          | 0           | 156,67 | 117,16 | 98,34  | 48,05 | 16,98 | 21,61 |
| 798   | Female | 54  | Ulna             | Air    | 0          | 0           | 156,33 | 114,16 | 102,84 | 47,19 | 19,09 | 17,86 |
| 799   | Female | 54  | Ulna             | Fat    | 0          | 0           | 152,67 | 104,33 | 95,17  | 47,20 | 22,81 | 18,33 |
| 800   | Female | 54  | Radius           | Air    | 0          | 0           | 174,33 | 141,33 | 119,84 | 57,40 | 12,14 | 20,52 |
| 801   | Female | 54  | Radius           | Fat    | 0          | 0           | 168,50 | 118,00 | 113,84 | 53,88 | 13,48 | 21,11 |
| 802   | Female | 54  | Ulna             | Air    | 0          | 0           | 139,33 | 104,00 | 88,67  | 42,01 | 15,31 | 18,93 |
| 803   | Female | 54  | Ulna             | Air    | 0          | 0           | 148,50 | 111,50 | 97,34  | 45,42 | 16,06 | 18,85 |
| 804   | Female | 54  | Radius           | Fat    | 0          | 0           | 152,33 | 117,66 | 99,00  | 47,53 | 14,10 | 20,48 |
| 805   | Female | 54  | Radius           | Air    | 0          | 0           | 162,83 | 125,50 | 105,34 | 50,36 | 15,76 | 21,80 |
| 806   | Female | 54  | Ulna             | Fat    | 0          | 0           | 167,83 | 127,00 | 115,00 | 51,53 | 17,68 | 19,04 |
| 807   | Female | 54  | Ulna             | Air    | 0          | 0           | 165,83 | 131,16 | 109,34 | 45,19 | 13,48 | 21,72 |
| 808   | Female | 54  | Radius           | Fat    | 0          | 0           | 164,17 | 123,16 | 111,17 | 50,31 | 18,38 | 17,39 |
| 809   | Female | 54  | Radius           | Air    | 0          | 0           | 169,00 | 133,50 | 114,34 | 54,04 | 13,95 | 20,28 |
| 810   | Female | 54  | Ulna             | Fat    | 0          | 0           | 164,67 | 121,16 | 109,34 | 50,46 | 19,55 | 18,35 |
| 811   | Female | 54  | Ulna             | Air    | 0          | 0           | 158,67 | 121,83 | 109,50 | 49,76 | 15,81 | 16,46 |
| 812   | Female | 54  | Radius           | Fat    | 0          | 0           | 177,83 | 145,33 | 123,00 | 58,78 | 11,08 | 20,07 |
| 813   | Female | 54  | Radius           | Fat    | 0          | 0           | 183,50 | 145,83 | 124,84 | 59,01 | 14,46 | 21,55 |
| 814   | Female | 81  | Humerus          | Air    | 0          | 0           | 159,17 | 118,83 | 90,00  | 48,25 | 16,55 | 28,22 |

**Table s9. Raw data of the learning set (20/20)**

| ID nr | Sex    | Age | Skeletal element | Medium | Temp. (°C) | Time (min.) | R      | G      | B      | L*    | A*    | B*    |
|-------|--------|-----|------------------|--------|------------|-------------|--------|--------|--------|-------|-------|-------|
| 815   | Female | 81  | Radius           | Fat    | 0          | 0           | 149,00 | 115,16 | 91,84  | 46,35 | 13,23 | 23,14 |
| 816   | Female | 81  | Ulna             | Air    | 0          | 0           | 164,83 | 125,16 | 98,17  | 51,33 | 16,06 | 26,47 |
| 817   | Female | 81  | Humerus          | Fat    | 0          | 0           | 155,67 | 120,66 | 91,50  | 48,21 | 13,40 | 26,86 |
| 818   | Female | 81  | Radius           | Air    | 0          | 0           | 152,00 | 114,50 | 88,50  | 49,54 | 12,60 | 24,95 |
| 819   | Female | 81  | Ulna             | Fat    | 0          | 0           | 160,17 | 106,66 | 98,50  | 50,29 | 14,69 | 24,87 |
| 820   | Female | 81  | Humerus          | Air    | 0          | 0           | 152,83 | 112,33 | 84,67  | 49,11 | 13,24 | 25,57 |
| 821   | Female | 81  | Radius           | Fat    | 0          | 0           | 152,83 | 115,66 | 89,67  | 47,20 | 14,82 | 25,31 |
| 822   | Female | 81  | Ulna             | Air    | 0          | 0           | 153,33 | 118,83 | 93,84  | 47,31 | 13,64 | 24,13 |
| 823   | Female | 81  | Humerus          | Fat    | 0          | 0           | 154,33 | 118,16 | 94,50  | 46,60 | 13,88 | 22,91 |
| 824   | Female | 81  | Radius           | Air    | 0          | 0           | 151,67 | 116,83 | 87,67  | 41,66 | 14,82 | 26,80 |
| 825   | Female | 81  | Ulna             | Fat    | 0          | 0           | 154,00 | 119,16 | 95,00  | 48,29 | 13,56 | 23,86 |
| 826   | Female | 81  | Humerus          | Air    | 0          | 0           | 168,83 | 135,16 | 108,34 | 53,57 | 12,48 | 24,40 |
| 827   | Female | 81  | Radius           | Fat    | 0          | 0           | 152,67 | 118,00 | 91,50  | 47,52 | 15,25 | 25,37 |
| 828   | Female | 81  | Ulna             | Air    | 0          | 0           | 157,67 | 120,83 | 94,34  | 42,40 | 14,54 | 25,71 |
| 829   | Female | 81  | Humerus          | Fat    | 0          | 0           | 162,67 | 123,83 | 98,00  | 50,58 | 15,62 | 25,50 |
| 830   | Female | 81  | Radius           | Air    | 0          | 0           | 155,00 | 96,00  | 86,67  | 50,05 | 14,29 | 25,30 |
| 831   | Female | 81  | Humerus          | Fat    | 0          | 0           | 148,17 | 89,33  | 79,84  | 45,93 | 15,65 | 23,11 |
| 832   | Female | 81  | Radius           | Air    | 0          | 0           | 139,67 | 103,50 | 79,84  | 41,53 | 12,35 | 21,43 |
| 833   | Female | 81  | Ulna             | Fat    | 0          | 0           | 162,33 | 119,83 | 95,50  | 53,05 | 14,13 | 23,63 |

**Table s10. Raw data of the test set (1/14)**

| ID nr | Device     | Size | Medium | Temp. (°C) | Time (min.) | L*     | B*     |
|-------|------------|------|--------|------------|-------------|--------|--------|
| 1     | Scanner HP | 4mm  | -      | 0          | -           | 76,085 | 20,19  |
| 2     | Scanner HP | 4mm  | -      | 0          | -           | 66     | 21,551 |
| 3     | Scanner HP | 4mm  | -      | 0          | -           | 68,849 | 22,413 |
| 4     | Scanner HP | 4mm  | -      | 0          | -           | 67,61  | 24,974 |
| 5     | Scanner HP | 4mm  | -      | 0          | -           | 64,593 | 23,58  |
| 6     | Scanner HP | 4mm  | Air    | 100        | 10          | 77,706 | 22,219 |
| 7     | Scanner HP | 4mm  | Air    | 100        | 10          | 68,217 | 23,277 |
| 8     | Scanner HP | 4mm  | Air    | 100        | 10          | 69,079 | 19,182 |
| 9     | Scanner HP | 4mm  | Air    | 100        | 10          | 67,412 | 23,1   |
| 10    | Scanner HP | 4mm  | Air    | 100        | 10          | 74,112 | 23,073 |
| 11    | Scanner HP | 4mm  | Air    | 100        | 20          | 73,775 | 21,635 |
| 12    | Scanner HP | 4mm  | Air    | 100        | 20          | 66,766 | 21,969 |
| 13    | Scanner HP | 4mm  | Air    | 100        | 20          | 68,101 | 20,613 |
| 14    | Scanner HP | 4mm  | Air    | 100        | 20          | 72,023 | 20,685 |
| 15    | Scanner HP | 4mm  | Air    | 100        | 20          | 71,368 | 21,878 |
| 16    | Scanner HP | 4mm  | Air    | 100        | 30          | 73,287 | 20,535 |
| 17    | Scanner HP | 4mm  | Air    | 100        | 30          | 75,525 | 21,681 |
| 18    | Scanner HP | 4mm  | Air    | 100        | 30          | 71,007 | 21,653 |
| 19    | Scanner HP | 4mm  | Air    | 100        | 30          | 71,29  | 20,526 |
| 20    | Scanner HP | 4mm  | Air    | 100        | 30          | 64,513 | 22,445 |

**Table s10. Raw data of the test set (2/14)**

| ID nr | Device     | Size | Medium | Temp. (°C) | Time (min.) | L*     | B*     |
|-------|------------|------|--------|------------|-------------|--------|--------|
| 21    | Scanner HP | 4mm  | Fat    | 100        | 20          | 63,006 | 20,182 |
| 22    | Scanner HP | 4mm  | Fat    | 100        | 20          | 61,425 | 21,652 |
| 23    | Scanner HP | 4mm  | Fat    | 100        | 20          | 61,878 | 22,076 |
| 24    | Scanner HP | 4mm  | Fat    | 100        | 20          | 58,8   | 23,055 |
| 25    | Scanner HP | 4mm  | Fat    | 100        | 20          | 56,776 | 18,461 |
| 26    | Scanner HP | 4mm  | Fat    | 100        | 30          | 58,422 | 22,756 |
| 27    | Scanner HP | 4mm  | Fat    | 100        | 30          | 58,047 | 19,089 |
| 28    | Scanner HP | 4mm  | Fat    | 100        | 30          | 60,859 | 21,901 |
| 29    | Scanner HP | 4mm  | Fat    | 100        | 30          | 63,249 | 22,321 |
| 30    | Scanner HP | 4mm  | Fat    | 100        | 30          | 63,563 | 20,031 |
| 31    | Scanner HP | 4mm  | Air    | 250        | 10          | 72,414 | 20,03  |
| 32    | Scanner HP | 4mm  | Air    | 250        | 10          | 68,275 | 19,198 |
| 33    | Scanner HP | 4mm  | Air    | 250        | 10          | 76,588 | 19,065 |
| 34    | Scanner HP | 4mm  | Air    | 250        | 10          | 74,772 | 19,655 |
| 35    | Scanner HP | 4mm  | Air    | 250        | 10          | 80,621 | 19,585 |
| 36    | Scanner HP | 4mm  | Air    | 250        | 20          | 72,29  | 23,836 |
| 37    | Scanner HP | 4mm  | Air    | 250        | 20          | 65,63  | 28,426 |
| 38    | Scanner HP | 4mm  | Air    | 250        | 20          | 64,638 | 25,937 |
| 39    | Scanner HP | 4mm  | Air    | 250        | 20          | 67,047 | 27,494 |
| 40    | Scanner HP | 4mm  | Air    | 250        | 20          | 74,663 | 22,208 |
| 41    | Scanner HP | 4mm  | Air    | 250        | 30          | 50,487 | 28,065 |
| 42    | Scanner HP | 4mm  | Air    | 250        | 30          | 59,745 | 29,75  |
| 43    | Scanner HP | 4mm  | Air    | 250        | 30          | 49,892 | 24,582 |
| 44    | Scanner HP | 4mm  | Air    | 250        | 30          | 58,066 | 28,582 |
| 45    | Scanner HP | 4mm  | Air    | 250        | 30          | 53,032 | 26,843 |
| 46    | Scanner HP | 4mm  | Fat    | 250        | 20          | 62,595 | 20,737 |
| 47    | Scanner HP | 4mm  | Fat    | 250        | 20          | 57     | 20,392 |
| 48    | Scanner HP | 4mm  | Fat    | 250        | 20          | 54,152 | 18,292 |
| 49    | Scanner HP | 4mm  | Fat    | 250        | 20          | 62,832 | 20,475 |
| 50    | Scanner HP | 4mm  | Fat    | 250        | 20          | 56,978 | 20,7   |
| 51    | Scanner HP | 4mm  | Fat    | 250        | 30          | 59,879 | 21,26  |
| 52    | Scanner HP | 4mm  | Fat    | 250        | 30          | 59,19  | 20,545 |
| 53    | Scanner HP | 4mm  | Fat    | 250        | 30          | 62,395 | 18,56  |
| 54    | Scanner HP | 4mm  | Fat    | 250        | 30          | 53,511 | 18,167 |
| 55    | Scanner HP | 4mm  | Fat    | 250        | 30          | 53,851 | 19,726 |
| 56    | Scanner HP | 4mm  | Air    | 300        | 10          | 65,943 | 27,76  |
| 57    | Scanner HP | 4mm  | Air    | 300        | 10          | 64,362 | 28,878 |
| 58    | Scanner HP | 4mm  | Air    | 300        | 10          | 58,058 | 30,254 |
| 59    | Scanner HP | 4mm  | Air    | 300        | 10          | 58,153 | 28,038 |
| 60    | Scanner HP | 4mm  | Air    | 300        | 10          | 58,637 | 27,483 |
| 61    | Scanner HP | 4mm  | Air    | 300        | 20          | 29,432 | 4,544  |
| 62    | Scanner HP | 4mm  | Air    | 300        | 20          | 29,691 | 6,834  |
| 63    | Scanner HP | 4mm  | Air    | 300        | 20          | 25,396 | 4,835  |

**Table s10. Raw data of the test set (3/14)**

| ID nr | Device     | Size | Medium | Temp. (°C) | Time (min.) | L*     | B*     |
|-------|------------|------|--------|------------|-------------|--------|--------|
| 64    | Scanner HP | 4mm  | Air    | 300        | 20          | 31,022 | 7,798  |
| 65    | Scanner HP | 4mm  | Air    | 300        | 20          | 31,379 | 11,716 |
| 66    | Scanner HP | 4mm  | Air    | 300        | 30          | 28,95  | 8,386  |
| 67    | Scanner HP | 4mm  | Air    | 300        | 30          | 28,752 | 9,618  |
| 68    | Scanner HP | 4mm  | Air    | 300        | 30          | 30,088 | 11,381 |
| 69    | Scanner HP | 4mm  | Air    | 300        | 30          | 33,766 | 11,316 |
| 70    | Scanner HP | 4mm  | Air    | 300        | 30          | 30,63  | 8,871  |
| 71    | Scanner HP | 4mm  | Fat    | 300        | 20          | 61     | 21,531 |
| 72    | Scanner HP | 4mm  | Fat    | 300        | 20          | 52,405 | 20,846 |
| 73    | Scanner HP | 4mm  | Fat    | 300        | 20          | 58,438 | 19,196 |
| 74    | Scanner HP | 4mm  | Fat    | 300        | 20          | 59,46  | 22,638 |
| 75    | Scanner HP | 4mm  | Fat    | 300        | 20          | 54,424 | 20,213 |
| 76    | Scanner HP | 4mm  | Fat    | 300        | 30          | 56,088 | 21,671 |
| 77    | Scanner HP | 4mm  | Fat    | 300        | 30          | 62,239 | 24,576 |
| 78    | Scanner HP | 4mm  | Fat    | 300        | 30          | 54,597 | 24,762 |
| 79    | Scanner HP | 4mm  | Fat    | 300        | 30          | 50,722 | 21,189 |
| 80    | Scanner HP | 4mm  | Fat    | 300        | 30          | 64,181 | 24,561 |
| 81    | Scanner HP | 4mm  | Air    | 450        | 10          | 19,548 | -0,305 |
| 82    | Scanner HP | 4mm  | Air    | 450        | 10          | 18     | -0,752 |
| 83    | Scanner HP | 4mm  | Air    | 450        | 10          | 18,783 | -0,331 |
| 84    | Scanner HP | 4mm  | Air    | 450        | 10          | 19,767 | -0,588 |
| 85    | Scanner HP | 4mm  | Air    | 450        | 10          | 20,908 | -0,676 |
| 86    | Scanner HP | 4mm  | Air    | 450        | 20          | 27,976 | -0,991 |
| 87    | Scanner HP | 4mm  | Air    | 450        | 20          | 29,804 | -1,159 |
| 88    | Scanner HP | 4mm  | Air    | 450        | 20          | 32,901 | -0,127 |
| 89    | Scanner HP | 4mm  | Air    | 450        | 20          | 29,291 | -0,901 |
| 90    | Scanner HP | 4mm  | Air    | 450        | 20          | 29,022 | -0,91  |
| 91    | Scanner HP | 4mm  | Air    | 450        | 30          | 46,388 | 9,25   |
| 92    | Scanner HP | 4mm  | Air    | 450        | 30          | 26,969 | 2,116  |
| 93    | Scanner HP | 4mm  | Air    | 450        | 30          | 35,997 | 4,665  |
| 94    | Scanner HP | 4mm  | Air    | 450        | 30          | 35,538 | -0,421 |
| 95    | Scanner HP | 4mm  | Air    | 450        | 30          | 34,308 | 1,971  |
| 96    | Scanner HP | 4mm  | Air    | 500        | 10          | 30,447 | -0,534 |
| 97    | Scanner HP | 4mm  | Air    | 500        | 10          | 20,845 | -1,1   |
| 98    | Scanner HP | 4mm  | Air    | 500        | 10          | 29,892 | -1,262 |
| 99    | Scanner HP | 4mm  | Air    | 500        | 10          | 21,972 | -0,727 |
| 100   | Scanner HP | 4mm  | Air    | 500        | 10          | 28,023 | 0,269  |
| 101   | Scanner HP | 4mm  | Air    | 500        | 20          | 46,458 | 6,429  |
| 102   | Scanner HP | 4mm  | Air    | 500        | 20          | 45,039 | 6,974  |
| 103   | Scanner HP | 4mm  | Air    | 500        | 20          | 42,134 | 5,912  |
| 104   | Scanner HP | 4mm  | Air    | 500        | 20          | 39,855 | 4,509  |
| 105   | Scanner HP | 4mm  | Air    | 500        | 20          | 45,652 | 6,413  |
| 106   | Scanner HP | 4mm  | Air    | 500        | 30          | 46,141 | 5,01   |
| 107   | Scanner HP | 4mm  | Air    | 500        | 30          | 44,487 | 6,508  |

**Table s10. Raw data of the test set (4/14)**

| ID nr | Device     | Size | Medium | Temp. (°C) | Time (min.) | L*     | B*     |
|-------|------------|------|--------|------------|-------------|--------|--------|
| 108   | Scanner HP | 4mm  | Air    | 500        | 30          | 45,381 | 6,152  |
| 109   | Scanner HP | 4mm  | Air    | 500        | 30          | 40,012 | 4,253  |
| 110   | Scanner HP | 4mm  | Air    | 500        | 30          | 39,669 | 3,981  |
| 111   | Scanner HP | 4mm  | Air    | 650        | 10          | 36,617 | 0,667  |
| 112   | Scanner HP | 4mm  | Air    | 650        | 10          | 37,462 | 1,225  |
| 113   | Scanner HP | 4mm  | Air    | 650        | 10          | 35,317 | 0,905  |
| 114   | Scanner HP | 4mm  | Air    | 650        | 10          | 39,893 | 0,732  |
| 115   | Scanner HP | 4mm  | Air    | 650        | 10          | 34,459 | 0,894  |
| 116   | Scanner HP | 4mm  | Air    | 650        | 20          | 46,604 | 1,57   |
| 117   | Scanner HP | 4mm  | Air    | 650        | 20          | 43,951 | 0,832  |
| 118   | Scanner HP | 4mm  | Air    | 650        | 20          | 41,328 | 1,668  |
| 119   | Scanner HP | 4mm  | Air    | 650        | 20          | 42,518 | 0,982  |
| 120   | Scanner HP | 4mm  | Air    | 650        | 20          | 37,395 | 1,034  |
| 121   | Scanner HP | 4mm  | Air    | 650        | 30          | 55,767 | 2,623  |
| 122   | Scanner HP | 4mm  | Air    | 650        | 30          | 60,037 | 0,827  |
| 123   | Scanner HP | 4mm  | Air    | 650        | 30          | 66,984 | 2,569  |
| 124   | Scanner HP | 4mm  | Air    | 650        | 30          | 59,054 | 0,874  |
| 125   | Scanner HP | 4mm  | Air    | 650        | 30          | 54,968 | 1,065  |
| 126   | Scanner HP | 4mm  | Air    | 700        | 10          | 62,189 | -0,457 |
| 127   | Scanner HP | 4mm  | Air    | 700        | 10          | 56,836 | -1,37  |
| 128   | Scanner HP | 4mm  | Air    | 700        | 10          | 37,599 | -0,329 |
| 129   | Scanner HP | 4mm  | Air    | 700        | 10          | 53,305 | -0,753 |
| 130   | Scanner HP | 4mm  | Air    | 700        | 10          | 43,083 | -0,921 |
| 131   | Scanner HP | 4mm  | Air    | 700        | 20          | 94,656 | -1,364 |
| 132   | Scanner HP | 4mm  | Air    | 700        | 20          | 89,987 | -0,648 |
| 133   | Scanner HP | 4mm  | Air    | 700        | 20          | 95,432 | -0,686 |
| 134   | Scanner HP | 4mm  | Air    | 700        | 20          | 91,922 | -1,553 |
| 135   | Scanner HP | 4mm  | Air    | 700        | 20          | 90,143 | -1,272 |
| 136   | Scanner HP | 4mm  | Air    | 700        | 30          | 74,121 | -0,36  |
| 137   | Scanner HP | 4mm  | Air    | 700        | 30          | 95,229 | -0,931 |
| 138   | Scanner HP | 4mm  | Air    | 700        | 30          | 63,838 | 1,153  |
| 139   | Scanner HP | 4mm  | Air    | 700        | 30          | 84,667 | -0,903 |
| 140   | Scanner HP | 4mm  | Air    | 700        | 30          | 93,877 | -1,278 |
| 141   | Scanner HP | 4mm  | Air    | 850        | 10          | 94,191 | -0,692 |
| 142   | Scanner HP | 4mm  | Air    | 850        | 10          | 98,437 | -1,22  |
| 143   | Scanner HP | 4mm  | Air    | 850        | 10          | 92,929 | -0,223 |
| 144   | Scanner HP | 4mm  | Air    | 850        | 10          | 98,573 | -0,702 |
| 145   | Scanner HP | 4mm  | Air    | 850        | 10          | 91,861 | -0,3   |
| 146   | Scanner HP | 4mm  | Air    | 850        | 20          | 99,17  | -1,852 |
| 147   | Scanner HP | 4mm  | Air    | 850        | 20          | 98,242 | -1,216 |
| 148   | Scanner HP | 4mm  | Air    | 850        | 20          | 99,5   | -1,728 |
| 149   | Scanner HP | 4mm  | Air    | 850        | 20          | 99,661 | -2,3   |
| 150   | Scanner HP | 4mm  | Air    | 850        | 20          | 98,362 | -2,275 |
| 151   | Scanner HP | 4mm  | Air    | 850        | 30          | 98,754 | -1,435 |

**Table s10. Raw data of the test set (5/14)**

| ID nr | Device     | Size | Medium | Temp. (°C) | Time (min.) | L*     | B*     |
|-------|------------|------|--------|------------|-------------|--------|--------|
| 152   | Scanner HP | 4mm  | Air    | 850        | 30          | 99,104 | -1,116 |
| 153   | Scanner HP | 4mm  | Air    | 850        | 30          | 99,11  | -1,239 |
| 154   | Scanner HP | 4mm  | Air    | 850        | 30          | 98,544 | -1,528 |
| 155   | Scanner HP | 4mm  | Air    | 850        | 30          | 99,457 | -1,825 |
| 156   | Scanner HP | 4mm  | Air    | 100        | 50          | 63,403 | 19,081 |
| 157   | Scanner HP | 4mm  | Air    | 100        | 50          | 65,047 | 17,288 |
| 158   | Scanner HP | 4mm  | Air    | 100        | 50          | 53,424 | 18,497 |
| 159   | Scanner HP | 4mm  | Air    | 100        | 50          | 63,554 | 18,894 |
| 160   | Scanner HP | 4mm  | Air    | 100        | 50          | 74,143 | 18,96  |
| 161   | Scanner HP | 4mm  | Air    | 250        | 50          | 55,486 | 22,952 |
| 162   | Scanner HP | 4mm  | Air    | 250        | 50          | 68,408 | 24,978 |
| 163   | Scanner HP | 4mm  | Air    | 250        | 50          | 55,768 | 24,226 |
| 164   | Scanner HP | 4mm  | Air    | 250        | 50          | 59,38  | 27,101 |
| 165   | Scanner HP | 4mm  | Air    | 250        | 50          | 62,744 | 25,992 |
| 166   | Scanner HP | 4mm  | Air    | 300        | 50          | 28,646 | 9,655  |
| 167   | Scanner HP | 4mm  | Air    | 300        | 50          | 28,738 | -0,092 |
| 168   | Scanner HP | 4mm  | Air    | 300        | 50          | 26,281 | -0,435 |
| 169   | Scanner HP | 4mm  | Air    | 300        | 50          | 25,381 | -0,106 |
| 170   | Scanner HP | 4mm  | Air    | 300        | 50          | 33,659 | -0,646 |
| 171   | Scanner HP | 4mm  | Air    | 350        | 50          | 29,42  | -1,058 |
| 172   | Scanner HP | 4mm  | Air    | 350        | 50          | 33,266 | -1,285 |
| 173   | Scanner HP | 4mm  | Air    | 350        | 50          | 40,203 | -0,584 |
| 174   | Scanner HP | 4mm  | Air    | 350        | 50          | 38,333 | -0,484 |
| 175   | Scanner HP | 4mm  | Air    | 350        | 50          | 36,704 | -0,758 |
| 176   | Scanner HP | 4mm  | Air    | 450        | 50          | 34,014 | 0,046  |
| 177   | Scanner HP | 4mm  | Air    | 450        | 50          | 34,515 | -0,431 |
| 178   | Scanner HP | 4mm  | Air    | 450        | 50          | 39,656 | 4,711  |
| 179   | Scanner HP | 4mm  | Air    | 450        | 50          | 40,09  | 0,829  |
| 180   | Scanner HP | 4mm  | Air    | 450        | 50          | 39,63  | -0,582 |
| 181   | Scanner HP | 4mm  | Air    | 500        | 50          | 50,309 | 7,475  |
| 182   | Scanner HP | 4mm  | Air    | 500        | 50          | 47,049 | 7,103  |
| 183   | Scanner HP | 4mm  | Air    | 500        | 50          | 50,131 | 7,33   |
| 184   | Scanner HP | 4mm  | Air    | 500        | 50          | 46,967 | 6,363  |
| 185   | Scanner HP | 4mm  | Air    | 500        | 50          | 49,841 | 6,47   |
| 186   | Scanner HP | 4mm  | Air    | 600        | 50          | 47,803 | 5,6    |
| 187   | Scanner HP | 4mm  | Air    | 600        | 50          | 45,663 | 2,758  |
| 188   | Scanner HP | 4mm  | Air    | 600        | 50          | 46,318 | 3,268  |
| 189   | Scanner HP | 4mm  | Air    | 600        | 50          | 42,252 | 3,427  |
| 190   | Scanner HP | 4mm  | Air    | 600        | 50          | 43,138 | 3,47   |
| 191   | Scanner HP | 4mm  | Air    | 650        | 50          | 82,816 | 0,315  |
| 192   | Scanner HP | 4mm  | Air    | 650        | 50          | 77,679 | 0,945  |
| 193   | Scanner HP | 4mm  | Air    | 650        | 50          | 64,181 | 2,939  |
| 194   | Scanner HP | 4mm  | Air    | 650        | 50          | 64,022 | 3,325  |
| 195   | Scanner HP | 4mm  | Air    | 650        | 50          | 72,366 | 1,746  |

**Table s10. Raw data of the test set (6/14)**

| ID nr | Device     | Size    | Medium | Temp. (°C) | Time (min.) | L*     | B*     |
|-------|------------|---------|--------|------------|-------------|--------|--------|
| 196   | Scanner HP | 4mm     | Air    | 700        | 50          | 97,611 | -1,951 |
| 197   | Scanner HP | 4mm     | Air    | 700        | 50          | 98,74  | -2,443 |
| 198   | Scanner HP | 4mm     | Air    | 700        | 50          | 97,751 | 0,24   |
| 199   | Scanner HP | 4mm     | Air    | 700        | 50          | 98,44  | -0,956 |
| 200   | Scanner HP | 4mm     | Air    | 700        | 50          | 99,089 | -0,963 |
| 201   | Scanner HP | 4mm     | Air    | 850        | 50          | 97,304 | 2,901  |
| 202   | Scanner HP | 4mm     | Air    | 850        | 50          | 96,971 | 1,378  |
| 203   | Scanner HP | 4mm     | Air    | 850        | 50          | 97,354 | 0,804  |
| 204   | Scanner HP | 4mm     | Air    | 850        | 50          | 98,307 | 1,992  |
| 205   | Scanner HP | 4mm     | Air    | 850        | 50          | 97,499 | 0,569  |
| 206   | Scanner HP | 40-80mm | Air    | 100        | 30          | 76,302 | 18,506 |
| 207   | Scanner HP | 40-80mm | Air    | 100        | 30          | 80,909 | 19,067 |
| 208   | Scanner HP | 40-80mm | Air    | 100        | 30          | 57,591 | 15,147 |
| 209   | Scanner HP | 40-80mm | Air    | 100        | 30          | 66,942 | 16,154 |
| 210   | Scanner HP | 40-80mm | Air    | 100        | 30          | 68,15  | 13,923 |
| 211   | Scanner HP | 40-80mm | Air    | 250        | 30          | 73,124 | 14,36  |
| 212   | Scanner HP | 40-80mm | Air    | 250        | 30          | 84,052 | 11,522 |
| 213   | Scanner HP | 40-80mm | Air    | 250        | 30          | 70,769 | 13,521 |
| 214   | Scanner HP | 40-80mm | Air    | 250        | 30          | 76,136 | 11,653 |
| 215   | Scanner HP | 40-80mm | Air    | 250        | 30          | 68,959 | 10,823 |
| 216   | Scanner HP | 40-80mm | Air    | 300        | 30          | 45,132 | 17,037 |
| 217   | Scanner HP | 40-80mm | Air    | 300        | 30          | 24,56  | 2,943  |
| 218   | Scanner HP | 40-80mm | Air    | 300        | 30          | 23,747 | 7,313  |
| 219   | Scanner HP | 40-80mm | Air    | 300        | 30          | 25,502 | 3,709  |
| 220   | Scanner HP | 40-80mm | Air    | 300        | 30          | 40,232 | 15,453 |
| 221   | Scanner HP | 40-80mm | Air    | 350        | 30          | 16,141 | -1,739 |
| 222   | Scanner HP | 40-80mm | Air    | 350        | 30          | 19,637 | -1,813 |
| 223   | Scanner HP | 40-80mm | Air    | 350        | 30          | 18,127 | -1,776 |
| 224   | Scanner HP | 40-80mm | Air    | 350        | 30          | 15,506 | -1,903 |
| 225   | Scanner HP | 40-80mm | Air    | 350        | 30          | 19,065 | -1,679 |
| 226   | Scanner HP | 40-80mm | Air    | 450        | 30          | 27,093 | -1,234 |
| 227   | Scanner HP | 40-80mm | Air    | 450        | 30          | 36,358 | -0,409 |
| 228   | Scanner HP | 40-80mm | Air    | 450        | 30          | 40,298 | 1,238  |
| 229   | Scanner HP | 40-80mm | Air    | 450        | 30          | 40,675 | 1,635  |
| 230   | Scanner HP | 40-80mm | Air    | 450        | 30          | 37,716 | 0,233  |
| 231   | Scanner HP | 40-80mm | Air    | 500        | 30          | 51,533 | 4,945  |
| 232   | Scanner HP | 40-80mm | Air    | 500        | 30          | 55,231 | 4,165  |
| 233   | Scanner HP | 40-80mm | Air    | 500        | 30          | 51,726 | 5,662  |
| 234   | Scanner HP | 40-80mm | Air    | 500        | 30          | 51,871 | 6,205  |
| 235   | Scanner HP | 40-80mm | Air    | 500        | 30          | 50,697 | 6,453  |
| 236   | Scanner HP | 40-80mm | Air    | 600        | 30          | 55,898 | 0,576  |
| 237   | Scanner HP | 40-80mm | Air    | 600        | 30          | 53,162 | 2,674  |
| 238   | Scanner HP | 40-80mm | Air    | 600        | 30          | 54,68  | 3,098  |
| 239   | Scanner HP | 40-80mm | Air    | 600        | 30          | 52,411 | 2,354  |

**Table s10. Raw data of the test set (7/14)**

| ID nr | Device     | Size    | Medium | Temp. (°C) | Time (min.) | L*     | B*     |
|-------|------------|---------|--------|------------|-------------|--------|--------|
| 240   | Scanner HP | 40-80mm | Air    | 600        | 30          | 53,993 | 1,734  |
| 241   | Scanner HP | 40-80mm | Air    | 650        | 30          | 81,605 | -0,191 |
| 242   | Scanner HP | 40-80mm | Air    | 650        | 30          | 68,484 | 0,379  |
| 243   | Scanner HP | 40-80mm | Air    | 650        | 30          | 72,627 | 0,924  |
| 244   | Scanner HP | 40-80mm | Air    | 650        | 30          | 70,545 | 0,241  |
| 245   | Scanner HP | 40-80mm | Air    | 650        | 30          | 75,704 | 1,269  |
| 246   | Scanner HP | 40-80mm | Air    | 700        | 30          | 79,437 | -1,581 |
| 247   | Scanner HP | 40-80mm | Air    | 700        | 30          | 78,434 | 0,045  |
| 248   | Scanner HP | 40-80mm | Air    | 700        | 30          | 70,919 | -5,253 |
| 249   | Scanner HP | 40-80mm | Air    | 700        | 30          | 93,412 | -0,173 |
| 250   | Scanner HP | 40-80mm | Air    | 700        | 30          | 81,749 | -0,459 |
| 251   | Scanner HP | 40-80mm | Air    | 850        | 30          | 84     | 4,031  |
| 252   | Scanner HP | 40-80mm | Air    | 850        | 30          | 90,557 | 2,254  |
| 253   | Scanner HP | 40-80mm | Air    | 850        | 30          | 86,782 | 5,053  |
| 254   | Scanner HP | 40-80mm | Air    | 850        | 30          | 96,389 | 1,836  |
| 255   | Scanner HP | 40-80mm | Air    | 850        | 30          | 95,989 | 2,326  |
| 256   | Scanner HP | 4mm     | Air    | 100        | 5           | 50,83  | 15,730 |
| 257   | Scanner HP | 4mm     | Air    | 100        | 5           | 49,86  | 14,588 |
| 258   | Scanner HP | 4mm     | Air    | 100        | 5           | 46,77  | 17,073 |
| 259   | Scanner HP | 4mm     | Air    | 100        | 5           | 45,76  | 14,750 |
| 260   | Scanner HP | 4mm     | Air    | 100        | 5           | 46,83  | 16,428 |
| 261   | Scanner HP | 4mm     | Air    | 250        | 5           | 54,99  | 14,017 |
| 262   | Scanner HP | 4mm     | Air    | 250        | 5           | 57,02  | 14,205 |
| 263   | Scanner HP | 4mm     | Air    | 250        | 5           | 54,80  | 14,102 |
| 264   | Scanner HP | 4mm     | Air    | 250        | 5           | 54,52  | 11,848 |
| 265   | Scanner HP | 4mm     | Air    | 250        | 5           | 58,30  | 14,135 |
| 266   | Scanner HP | 4mm     | Air    | 300        | 5           | 57,78  | 13,480 |
| 267   | Scanner HP | 4mm     | Air    | 300        | 5           | 54,80  | 17,457 |
| 268   | Scanner HP | 4mm     | Air    | 300        | 5           | 59,38  | 15,858 |
| 269   | Scanner HP | 4mm     | Air    | 300        | 5           | 53,52  | 13,697 |
| 270   | Scanner HP | 4mm     | Air    | 300        | 5           | 57,14  | 15,437 |
| 271   | Scanner HP | 4mm     | Air    | 350        | 5           | 57,23  | 16,183 |
| 272   | Scanner HP | 4mm     | Air    | 350        | 5           | 62,48  | 16,512 |
| 273   | Scanner HP | 4mm     | Air    | 350        | 5           | 55,23  | 18,957 |
| 274   | Scanner HP | 4mm     | Air    | 350        | 5           | 52,46  | 19,987 |
| 275   | Scanner HP | 4mm     | Air    | 350        | 5           | 51,72  | 18,133 |
| 276   | Scanner HP | 4mm     | Air    | 450        | 5           | 19,49  | -3,457 |
| 277   | Scanner HP | 4mm     | Air    | 450        | 5           | 24,85  | 0,513  |
| 278   | Scanner HP | 4mm     | Air    | 450        | 5           | 24,76  | -1,368 |
| 279   | Scanner HP | 4mm     | Air    | 450        | 5           | 23,11  | 0,607  |
| 280   | Scanner HP | 4mm     | Air    | 450        | 5           | 21,64  | -1,883 |
| 281   | Scanner HP | 4mm     | Air    | 500        | 5           | 16,15  | -3,753 |
| 282   | Scanner HP | 4mm     | Air    | 500        | 5           | 21,33  | -3,432 |
| 283   | Scanner HP | 4mm     | Air    | 500        | 5           | 22,36  | -4,628 |

**Table s10. Raw data of the test set (8/14)**

| ID nr | Device     | Size | Medium | Temp. (°C) | Time (min.) | L*     | B*     |
|-------|------------|------|--------|------------|-------------|--------|--------|
| 284   | Scanner HP | 4mm  | Air    | 500        | 5           | 22,36  | -4,292 |
| 285   | Scanner HP | 4mm  | Air    | 500        | 5           | 19,19  | -4,110 |
| 286   | Scanner HP | 4mm  | Air    | 600        | 5           | 18,31  | -3,908 |
| 287   | Scanner HP | 4mm  | Air    | 600        | 5           | 19,72  | -3,485 |
| 288   | Scanner HP | 4mm  | Air    | 600        | 5           | 20,84  | -4,207 |
| 289   | Scanner HP | 4mm  | Air    | 600        | 5           | 23,49  | -2,987 |
| 290   | Scanner HP | 4mm  | Air    | 600        | 5           | 17,62  | -3,530 |
| 291   | Scanner HP | 4mm  | Air    | 700        | 5           | 32,42  | -3,467 |
| 292   | Scanner HP | 4mm  | Air    | 700        | 5           | 30,71  | -2,685 |
| 293   | Scanner HP | 4mm  | Air    | 700        | 5           | 29,49  | -3,412 |
| 294   | Scanner HP | 4mm  | Air    | 700        | 5           | 27,40  | -2,598 |
| 295   | Scanner HP | 4mm  | Air    | 700        | 5           | 26,98  | -2,952 |
| 296   | Scanner HP | 4mm  | Air    | 800        | 5           | 85,09  | -3,420 |
| 297   | Scanner HP | 4mm  | Air    | 800        | 5           | 78,08  | -4,370 |
| 298   | Scanner HP | 4mm  | Air    | 800        | 5           | 86,20  | -4,782 |
| 299   | Scanner HP | 4mm  | Air    | 800        | 5           | 84,74  | -4,240 |
| 300   | Scanner HP | 4mm  | Air    | 800        | 5           | 86,48  | -3,808 |
| 301   | Scanner HP | 4mm  | Air    | 900        | 5           | 93,92  | -4,268 |
| 302   | Scanner HP | 4mm  | Air    | 900        | 5           | 94,46  | -4,010 |
| 303   | Scanner HP | 4mm  | Air    | 900        | 5           | 94,48  | -4,318 |
| 304   | Scanner HP | 4mm  | Air    | 900        | 5           | 92,32  | -4,123 |
| 305   | Scanner HP | 4mm  | Air    | 900        | 5           | 93,05  | -4,045 |
| 1     | Nikon D700 | 4mm  | -      | 0          | -           | 91,624 | 16,620 |
| 2     | Nikon D700 | 4mm  | -      | 0          | -           | 94,475 | 33,879 |
| 3     | Nikon D700 | 4mm  | -      | 0          | -           | 88,27  | 27,475 |
| 4     | Nikon D700 | 4mm  | -      | 0          | -           | 86,02  | 33,520 |
| 5     | Nikon D700 | 4mm  | -      | 0          | -           | 87,758 | 35,660 |
| 6     | Nikon D700 | 4mm  | Air    | 100        | 10          | 89,404 | 14,253 |
| 7     | Nikon D700 | 4mm  | Air    | 100        | 10          | 89,6   | 18,467 |
| 8     | Nikon D700 | 4mm  | Air    | 100        | 10          | 80,937 | 20,067 |
| 9     | Nikon D700 | 4mm  | Air    | 100        | 10          | 85,123 | 22,323 |
| 10    | Nikon D700 | 4mm  | Air    | 100        | 10          | 88,32  | 15,660 |
| 11    | Nikon D700 | 4mm  | Air    | 100        | 20          | 88,772 | 20,564 |
| 12    | Nikon D700 | 4mm  | Air    | 100        | 20          | 89,331 | 23,750 |
| 13    | Nikon D700 | 4mm  | Air    | 100        | 20          | 89,309 | 20,944 |
| 14    | Nikon D700 | 4mm  | Air    | 100        | 20          | 91,778 | 16,566 |
| 15    | Nikon D700 | 4mm  | Air    | 100        | 20          | 91,469 | 19,015 |
| 16    | Nikon D700 | 4mm  | Air    | 100        | 30          | 92,455 | 14,934 |
| 17    | Nikon D700 | 4mm  | Air    | 100        | 30          | 90,818 | 16,511 |
| 18    | Nikon D700 | 4mm  | Air    | 100        | 30          | 91,26  | 20,591 |
| 19    | Nikon D700 | 4mm  | Air    | 100        | 30          | 92,965 | 15,705 |
| 20    | Nikon D700 | 4mm  | Air    | 100        | 30          | 91,502 | 21,177 |
| 21    | Nikon D700 | 4mm  | Fat    | 100        | 20          | 86,272 | 39,908 |
| 22    | Nikon D700 | 4mm  | Fat    | 100        | 20          | 81,948 | 44,937 |

**Table s10. Raw data of the test set (9/14)**

| ID nr | Device     | Size | Medium | Temp. (°C) | Time (min.) | L*     | B*     |
|-------|------------|------|--------|------------|-------------|--------|--------|
| 23    | Nikon D700 | 4mm  | Fat    | 100        | 20          | 87,506 | 32,985 |
| 24    | Nikon D700 | 4mm  | Fat    | 100        | 20          | 83,149 | 47,538 |
| 25    | Nikon D700 | 4mm  | Fat    | 100        | 20          | 77,944 | 41,475 |
| 26    | Nikon D700 | 4mm  | Fat    | 100        | 30          | 79,178 | 38,899 |
| 27    | Nikon D700 | 4mm  | Fat    | 100        | 30          | 74,682 | 47,234 |
| 28    | Nikon D700 | 4mm  | Fat    | 100        | 30          | 82,121 | 32,065 |
| 29    | Nikon D700 | 4mm  | Fat    | 100        | 30          | 87,655 | 31,296 |
| 30    | Nikon D700 | 4mm  | Fat    | 100        | 30          | 83,347 | 36,106 |
| 31    | Nikon D700 | 4mm  | Air    | 250        | 10          | 93,474 | 13,978 |
| 32    | Nikon D700 | 4mm  | Air    | 250        | 10          | 91,888 | 17,453 |
| 33    | Nikon D700 | 4mm  | Air    | 250        | 10          | 93,928 | 10,873 |
| 34    | Nikon D700 | 4mm  | Air    | 250        | 10          | 93,408 | 13,377 |
| 35    | Nikon D700 | 4mm  | Air    | 250        | 10          | 94,083 | 12,607 |
| 36    | Nikon D700 | 4mm  | Air    | 250        | 20          | 92,669 | 17,582 |
| 37    | Nikon D700 | 4mm  | Air    | 250        | 20          | 89,206 | 32,598 |
| 38    | Nikon D700 | 4mm  | Air    | 250        | 20          | 88,765 | 27,192 |
| 39    | Nikon D700 | 4mm  | Air    | 250        | 20          | 89,522 | 27,807 |
| 40    | Nikon D700 | 4mm  | Air    | 250        | 20          | 93,146 | 16,078 |
| 41    | Nikon D700 | 4mm  | Air    | 250        | 30          | 77,358 | 56,114 |
| 42    | Nikon D700 | 4mm  | Air    | 250        | 30          | 86,041 | 43,211 |
| 43    | Nikon D700 | 4mm  | Air    | 250        | 30          | 77,637 | 43,525 |
| 44    | Nikon D700 | 4mm  | Air    | 250        | 30          | 83,486 | 48,088 |
| 45    | Nikon D700 | 4mm  | Air    | 250        | 30          | 78,738 | 53,198 |
| 46    | Nikon D700 | 4mm  | Fat    | 250        | 20          | 71,554 | 33,751 |
| 47    | Nikon D700 | 4mm  | Fat    | 250        | 20          | 72,222 | 38,988 |
| 48    | Nikon D700 | 4mm  | Fat    | 250        | 20          | 81,815 | 34,255 |
| 49    | Nikon D700 | 4mm  | Fat    | 250        | 20          | 84,185 | 27,236 |
| 50    | Nikon D700 | 4mm  | Fat    | 250        | 20          | 84,248 | 34,660 |
| 51    | Nikon D700 | 4mm  | Fat    | 250        | 30          | 86,015 | 30,985 |
| 52    | Nikon D700 | 4mm  | Fat    | 250        | 30          | 79,834 | 35,565 |
| 53    | Nikon D700 | 4mm  | Fat    | 250        | 30          | 77,168 | 37,688 |
| 54    | Nikon D700 | 4mm  | Fat    | 250        | 30          | 76,382 | 38,797 |
| 55    | Nikon D700 | 4mm  | Fat    | 250        | 30          | 72,785 | 36,643 |
| 56    | Nikon D700 | 4mm  | Air    | 300        | 10          | 89,413 | 31,269 |
| 57    | Nikon D700 | 4mm  | Air    | 300        | 10          | 88,212 | 38,060 |
| 58    | Nikon D700 | 4mm  | Air    | 300        | 10          | 85,297 | 45,222 |
| 59    | Nikon D700 | 4mm  | Air    | 300        | 10          | 81,329 | 44,665 |
| 60    | Nikon D700 | 4mm  | Air    | 300        | 10          | 82,876 | 46,525 |
| 61    | Nikon D700 | 4mm  | Air    | 300        | 20          | 37,457 | 16,196 |
| 62    | Nikon D700 | 4mm  | Air    | 300        | 20          | 40,28  | 11,953 |
| 63    | Nikon D700 | 4mm  | Air    | 300        | 20          | 38,483 | 16,153 |
| 64    | Nikon D700 | 4mm  | Air    | 300        | 20          | 41,875 | 24,797 |
| 65    | Nikon D700 | 4mm  | Air    | 300        | 20          | 48,322 | 57,512 |
| 66    | Nikon D700 | 4mm  | Air    | 300        | 30          | 44,331 | 19,061 |

**Table s10. Raw data of the test set (10/14)**

| ID nr | Device     | Size | Medium | Temp. (°C) | Time (min.) | L*     | B*     |
|-------|------------|------|--------|------------|-------------|--------|--------|
| 67    | Nikon D700 | 4mm  | Air    | 300        | 30          | 40,591 | 24,673 |
| 68    | Nikon D700 | 4mm  | Air    | 300        | 30          | 44,756 | 32,485 |
| 69    | Nikon D700 | 4mm  | Air    | 300        | 30          | 46,582 | 23,416 |
| 70    | Nikon D700 | 4mm  | Air    | 300        | 30          | 37,693 | 21,741 |
| 71    | Nikon D700 | 4mm  | Fat    | 300        | 20          | 78,051 | 40,426 |
| 72    | Nikon D700 | 4mm  | Fat    | 300        | 20          | 66,445 | 46,055 |
| 73    | Nikon D700 | 4mm  | Fat    | 300        | 20          | 68,758 | 36,071 |
| 74    | Nikon D700 | 4mm  | Fat    | 300        | 20          | 84,147 | 35,352 |
| 75    | Nikon D700 | 4mm  | Fat    | 300        | 20          | 81,205 | 37,268 |
| 76    | Nikon D700 | 4mm  | Fat    | 300        | 30          | 75,809 | 38,824 |
| 77    | Nikon D700 | 4mm  | Fat    | 300        | 30          | 77,518 | 46,305 |
| 78    | Nikon D700 | 4mm  | Fat    | 300        | 30          | 71,63  | 49,429 |
| 79    | Nikon D700 | 4mm  | Fat    | 300        | 30          | 68,173 | 39,427 |
| 80    | Nikon D700 | 4mm  | Fat    | 300        | 30          | 75,81  | 37,051 |
| 81    | Nikon D700 | 4mm  | Air    | 450        | 10          | 22,682 | -1,748 |
| 82    | Nikon D700 | 4mm  | Air    | 450        | 10          | 14,269 | -1,019 |
| 83    | Nikon D700 | 4mm  | Air    | 450        | 10          | 20,331 | 1,365  |
| 84    | Nikon D700 | 4mm  | Air    | 450        | 10          | 16,064 | -0,527 |
| 85    | Nikon D700 | 4mm  | Air    | 450        | 10          | 27,549 | -1,635 |
| 86    | Nikon D700 | 4mm  | Air    | 450        | 20          | 37,398 | -4,620 |
| 87    | Nikon D700 | 4mm  | Air    | 450        | 20          | 41,702 | -3,943 |
| 88    | Nikon D700 | 4mm  | Air    | 450        | 20          | 39,034 | -3,323 |
| 89    | Nikon D700 | 4mm  | Air    | 450        | 20          | 40,293 | -3,976 |
| 90    | Nikon D700 | 4mm  | Air    | 450        | 20          | 37,568 | -3,527 |
| 91    | Nikon D700 | 4mm  | Air    | 450        | 30          | 57,596 | 11,078 |
| 92    | Nikon D700 | 4mm  | Air    | 450        | 30          | 29,312 | 3,089  |
| 93    | Nikon D700 | 4mm  | Air    | 450        | 30          | 26,018 | 3,470  |
| 94    | Nikon D700 | 4mm  | Air    | 450        | 30          | 28,408 | -3,373 |
| 95    | Nikon D700 | 4mm  | Air    | 450        | 30          | 22,729 | -0,698 |
| 96    | Nikon D700 | 4mm  | Air    | 500        | 10          | 12,002 | -2,701 |
| 97    | Nikon D700 | 4mm  | Air    | 500        | 10          | 12,622 | -1,411 |
| 98    | Nikon D700 | 4mm  | Air    | 500        | 10          | 25,885 | -3,235 |
| 99    | Nikon D700 | 4mm  | Air    | 500        | 10          | 41,973 | 1,665  |
| 100   | Nikon D700 | 4mm  | Air    | 500        | 10          | 23,078 | -3,155 |
| 101   | Nikon D700 | 4mm  | Air    | 500        | 20          | 54,213 | 4,621  |
| 102   | Nikon D700 | 4mm  | Air    | 500        | 20          | 54,49  | 7,662  |
| 103   | Nikon D700 | 4mm  | Air    | 500        | 20          | 54,988 | 8,512  |
| 104   | Nikon D700 | 4mm  | Air    | 500        | 20          | 53,555 | 6,150  |
| 105   | Nikon D700 | 4mm  | Air    | 500        | 20          | 56,482 | 8,330  |
| 106   | Nikon D700 | 4mm  | Air    | 500        | 30          | 71,699 | 6,031  |
| 107   | Nikon D700 | 4mm  | Air    | 500        | 30          | 65,703 | 5,787  |
| 108   | Nikon D700 | 4mm  | Air    | 500        | 30          | 52,329 | 3,444  |
| 109   | Nikon D700 | 4mm  | Air    | 500        | 30          | 65,999 | 7,142  |
| 110   | Nikon D700 | 4mm  | Air    | 500        | 30          | 46,918 | 2,257  |

**Table s10. Raw data of the test set (11/14)**

| ID nr | Device     | Size | Medium | Temp. (°C) | Time (min.) | L*     | B*     |
|-------|------------|------|--------|------------|-------------|--------|--------|
| 111   | Nikon D700 | 4mm  | Air    | 650        | 10          | 43,093 | 0,469  |
| 112   | Nikon D700 | 4mm  | Air    | 650        | 10          | 39,83  | -0,376 |
| 113   | Nikon D700 | 4mm  | Air    | 650        | 10          | 29,353 | 0,880  |
| 114   | Nikon D700 | 4mm  | Air    | 650        | 10          | 36,185 | 0,368  |
| 115   | Nikon D700 | 4mm  | Air    | 650        | 10          | 32,622 | 1,739  |
| 116   | Nikon D700 | 4mm  | Air    | 650        | 20          | 43,818 | 1,658  |
| 117   | Nikon D700 | 4mm  | Air    | 650        | 20          | 46,971 | 0,111  |
| 118   | Nikon D700 | 4mm  | Air    | 650        | 20          | 45,802 | -0,206 |
| 119   | Nikon D700 | 4mm  | Air    | 650        | 20          | 45,796 | -0,625 |
| 120   | Nikon D700 | 4mm  | Air    | 650        | 20          | 46,294 | 0,047  |
| 121   | Nikon D700 | 4mm  | Air    | 650        | 30          | 79,693 | 1,135  |
| 122   | Nikon D700 | 4mm  | Air    | 650        | 30          | 73,837 | -1,181 |
| 123   | Nikon D700 | 4mm  | Air    | 650        | 30          | 75,617 | -1,546 |
| 124   | Nikon D700 | 4mm  | Air    | 650        | 30          | 63,696 | -2,866 |
| 125   | Nikon D700 | 4mm  | Air    | 650        | 30          | 67,966 | 0,190  |
| 126   | Nikon D700 | 4mm  | Air    | 700        | 10          | 65,456 | -4,646 |
| 127   | Nikon D700 | 4mm  | Air    | 700        | 10          | 51,947 | -6,234 |
| 128   | Nikon D700 | 4mm  | Air    | 700        | 10          | 48,767 | -4,242 |
| 129   | Nikon D700 | 4mm  | Air    | 700        | 10          | 70,429 | -5,662 |
| 130   | Nikon D700 | 4mm  | Air    | 700        | 10          | 41,818 | -4,482 |
| 131   | Nikon D700 | 4mm  | Air    | 700        | 20          | 95,499 | -0,602 |
| 132   | Nikon D700 | 4mm  | Air    | 700        | 20          | 93,867 | -1,581 |
| 133   | Nikon D700 | 4mm  | Air    | 700        | 20          | 92,002 | -2,639 |
| 134   | Nikon D700 | 4mm  | Air    | 700        | 20          | 95,504 | -0,529 |
| 135   | Nikon D700 | 4mm  | Air    | 700        | 20          | 95,446 | -0,869 |
| 136   | Nikon D700 | 4mm  | Air    | 700        | 30          | 85,977 | -2,297 |
| 137   | Nikon D700 | 4mm  | Air    | 700        | 30          | 93,051 | -2,265 |
| 138   | Nikon D700 | 4mm  | Air    | 700        | 30          | 85,167 | -0,344 |
| 139   | Nikon D700 | 4mm  | Air    | 700        | 30          | 96,204 | -1,151 |
| 140   | Nikon D700 | 4mm  | Air    | 700        | 30          | 97,35  | -0,469 |
| 141   | Nikon D700 | 4mm  | Air    | 850        | 10          | 96,797 | -0,447 |
| 142   | Nikon D700 | 4mm  | Air    | 850        | 10          | 97,464 | -0,387 |
| 143   | Nikon D700 | 4mm  | Air    | 850        | 10          | 94,553 | -0,459 |
| 144   | Nikon D700 | 4mm  | Air    | 850        | 10          | 97,026 | -0,266 |
| 145   | Nikon D700 | 4mm  | Air    | 850        | 10          | 94,576 | -0,014 |
| 146   | Nikon D700 | 4mm  | Air    | 850        | 20          | 97,454 | -0,534 |
| 147   | Nikon D700 | 4mm  | Air    | 850        | 20          | 97,542 | -0,338 |
| 148   | Nikon D700 | 4mm  | Air    | 850        | 20          | 98,137 | -0,340 |
| 149   | Nikon D700 | 4mm  | Air    | 850        | 20          | 98,226 | -0,243 |
| 150   | Nikon D700 | 4mm  | Air    | 850        | 20          | 98,249 | -0,157 |
| 151   | Nikon D700 | 4mm  | Air    | 850        | 30          | 96,103 | -0,263 |
| 152   | Nikon D700 | 4mm  | Air    | 850        | 30          | 96,988 | -0,255 |
| 153   | Nikon D700 | 4mm  | Air    | 850        | 30          | 97,599 | -0,190 |
| 154   | Nikon D700 | 4mm  | Air    | 850        | 30          | 98,214 | -0,317 |

**Table s10. Raw data of the test set (12/14)**

| ID nr | Device     | Size | Medium | Temp. (°C) | Time (min.) | L*     | B*     |
|-------|------------|------|--------|------------|-------------|--------|--------|
| 155   | Nikon D700 | 4mm  | Air    | 850        | 30          | 98,407 | -0,254 |
| 156   | Nikon D700 | 4mm  | Air    | 100        | 50          | 82,711 | 21,822 |
| 157   | Nikon D700 | 4mm  | Air    | 100        | 50          | 80,792 | 21,651 |
| 158   | Nikon D700 | 4mm  | Air    | 100        | 50          | 67,5   | 30,426 |
| 159   | Nikon D700 | 4mm  | Air    | 100        | 50          | 69,858 | 26,731 |
| 160   | Nikon D700 | 4mm  | Air    | 100        | 50          | 87,89  | 16,508 |
| 161   | Nikon D700 | 4mm  | Air    | 250        | 50          | 69,741 | 42,252 |
| 162   | Nikon D700 | 4mm  | Air    | 250        | 50          | 86,54  | 28,346 |
| 163   | Nikon D700 | 4mm  | Air    | 250        | 50          | 72,246 | 45,556 |
| 164   | Nikon D700 | 4mm  | Air    | 250        | 50          | 71,542 | 47,405 |
| 165   | Nikon D700 | 4mm  | Air    | 250        | 50          | 68,334 | 41,477 |
| 166   | Nikon D700 | 4mm  | Air    | 300        | 50          | 21,733 | 15,622 |
| 167   | Nikon D700 | 4mm  | Air    | 300        | 50          | 11,039 | -1,040 |
| 168   | Nikon D700 | 4mm  | Air    | 300        | 50          | 17,237 | 1,600  |
| 169   | Nikon D700 | 4mm  | Air    | 300        | 50          | 10,292 | 3,405  |
| 170   | Nikon D700 | 4mm  | Air    | 300        | 50          | 5,855  | 0,663  |
| 171   | Nikon D700 | 4mm  | Air    | 350        | 50          | 32,193 | -3,964 |
| 172   | Nikon D700 | 4mm  | Air    | 350        | 50          | 35,048 | -2,205 |
| 173   | Nikon D700 | 4mm  | Air    | 350        | 50          | 34,604 | -1,244 |
| 174   | Nikon D700 | 4mm  | Air    | 350        | 50          | 22,957 | -1,076 |
| 175   | Nikon D700 | 4mm  | Air    | 350        | 50          | 24,082 | -0,251 |
| 176   | Nikon D700 | 4mm  | Air    | 450        | 50          | 36,668 | 3,796  |
| 177   | Nikon D700 | 4mm  | Air    | 450        | 50          | 23,163 | -0,912 |
| 178   | Nikon D700 | 4mm  | Air    | 450        | 50          | 29,796 | 2,899  |
| 179   | Nikon D700 | 4mm  | Air    | 450        | 50          | 25,194 | 0,577  |
| 180   | Nikon D700 | 4mm  | Air    | 450        | 50          | 13,452 | -0,272 |
| 181   | Nikon D700 | 4mm  | Air    | 500        | 50          | 42,813 | 9,529  |
| 182   | Nikon D700 | 4mm  | Air    | 500        | 50          | 39,821 | 8,864  |
| 183   | Nikon D700 | 4mm  | Air    | 500        | 50          | 46,735 | 9,547  |
| 184   | Nikon D700 | 4mm  | Air    | 500        | 50          | 31,014 | 9,647  |
| 185   | Nikon D700 | 4mm  | Air    | 500        | 50          | 45,633 | 8,810  |
| 186   | Nikon D700 | 4mm  | Air    | 600        | 50          | 54,174 | 5,094  |
| 187   | Nikon D700 | 4mm  | Air    | 600        | 50          | 41,101 | -1,210 |
| 188   | Nikon D700 | 4mm  | Air    | 600        | 50          | 51,836 | -1,085 |
| 189   | Nikon D700 | 4mm  | Air    | 600        | 50          | 58,411 | 2,700  |
| 190   | Nikon D700 | 4mm  | Air    | 600        | 50          | 48,683 | -0,437 |
| 191   | Nikon D700 | 4mm  | Air    | 650        | 50          | 93,479 | -0,225 |
| 192   | Nikon D700 | 4mm  | Air    | 650        | 50          | 92,017 | 0,031  |
| 193   | Nikon D700 | 4mm  | Air    | 650        | 50          | 86,57  | 0,405  |
| 194   | Nikon D700 | 4mm  | Air    | 650        | 50          | 86,343 | 0,474  |
| 195   | Nikon D700 | 4mm  | Air    | 650        | 50          | 91,568 | 0,107  |
| 196   | Nikon D700 | 4mm  | Air    | 700        | 50          | 96,811 | -0,243 |
| 197   | Nikon D700 | 4mm  | Air    | 700        | 50          | 98,694 | -0,207 |
| 198   | Nikon D700 | 4mm  | Air    | 700        | 50          | 98,545 | -0,173 |

**Table s10. Raw data of the test set (13/14)**

| ID nr | Device     | Size    | Medium | Temp. (°C) | Time (min.) | L*     | B*     |
|-------|------------|---------|--------|------------|-------------|--------|--------|
| 199   | Nikon D700 | 4mm     | Air    | 700        | 50          | 97,731 | -0,159 |
| 200   | Nikon D700 | 4mm     | Air    | 700        | 50          | 97,37  | -0,582 |
| 201   | Nikon D700 | 4mm     | Air    | 850        | 50          | 97,936 | 0,139  |
| 202   | Nikon D700 | 4mm     | Air    | 850        | 50          | 97,478 | 0,221  |
| 203   | Nikon D700 | 4mm     | Air    | 850        | 50          | 96,342 | 0,782  |
| 204   | Nikon D700 | 4mm     | Air    | 850        | 50          | 96,68  | 0,334  |
| 205   | Nikon D700 | 4mm     | Air    | 850        | 50          | 98,776 | 0,095  |
| 206   | Nikon D700 | 40-80mm | Air    | 100        | 30          | 74,461 | 30,068 |
| 207   | Nikon D700 | 40-80mm | Air    | 100        | 30          | 73,738 | 31,525 |
| 208   | Nikon D700 | 40-80mm | Air    | 100        | 30          | 64,148 | 27,351 |
| 209   | Nikon D700 | 40-80mm | Air    | 100        | 30          | 75,996 | 27,072 |
| 210   | Nikon D700 | 40-80mm | Air    | 100        | 30          | 71,685 | 27,819 |
| 211   | Nikon D700 | 40-80mm | Air    | 250        | 30          | 76,459 | 21,734 |
| 212   | Nikon D700 | 40-80mm | Air    | 250        | 30          | 86,319 | 22,737 |
| 213   | Nikon D700 | 40-80mm | Air    | 250        | 30          | 72,597 | 23,887 |
| 214   | Nikon D700 | 40-80mm | Air    | 250        | 30          | 82,946 | 18,568 |
| 215   | Nikon D700 | 40-80mm | Air    | 250        | 30          | 79,02  | 21,678 |
| 216   | Nikon D700 | 40-80mm | Air    | 300        | 30          | 52,718 | 33,382 |
| 217   | Nikon D700 | 40-80mm | Air    | 300        | 30          | 22,065 | 12,178 |
| 218   | Nikon D700 | 40-80mm | Air    | 300        | 30          | 23,388 | 6,093  |
| 219   | Nikon D700 | 40-80mm | Air    | 300        | 30          | 18,384 | 6,061  |
| 220   | Nikon D700 | 40-80mm | Air    | 300        | 30          | 38,205 | 30,506 |
| 221   | Nikon D700 | 40-80mm | Air    | 350        | 30          | 10,179 | -1,720 |
| 222   | Nikon D700 | 40-80mm | Air    | 350        | 30          | 5,582  | -0,477 |
| 223   | Nikon D700 | 40-80mm | Air    | 350        | 30          | 14,947 | -1,175 |
| 224   | Nikon D700 | 40-80mm | Air    | 350        | 30          | 15,88  | -1,381 |
| 225   | Nikon D700 | 40-80mm | Air    | 350        | 30          | 14,068 | -2,973 |
| 226   | Nikon D700 | 40-80mm | Air    | 450        | 30          | 28,713 | -0,587 |
| 227   | Nikon D700 | 40-80mm | Air    | 450        | 30          | 39,266 | -0,599 |
| 228   | Nikon D700 | 40-80mm | Air    | 450        | 30          | 33,915 | 0,522  |
| 229   | Nikon D700 | 40-80mm | Air    | 450        | 30          | 32,244 | 1,856  |
| 230   | Nikon D700 | 40-80mm | Air    | 450        | 30          | 36,528 | 2,579  |
| 231   | Nikon D700 | 40-80mm | Air    | 500        | 30          | 52,539 | 1,723  |
| 232   | Nikon D700 | 40-80mm | Air    | 500        | 30          | 59,178 | 4,697  |
| 233   | Nikon D700 | 40-80mm | Air    | 500        | 30          | 46,532 | 8,306  |
| 234   | Nikon D700 | 40-80mm | Air    | 500        | 30          | 47,309 | 5,287  |
| 235   | Nikon D700 | 40-80mm | Air    | 500        | 30          | 52,434 | 10,213 |
| 236   | Nikon D700 | 40-80mm | Air    | 600        | 30          | 57,002 | 0,006  |
| 237   | Nikon D700 | 40-80mm | Air    | 600        | 30          | 48,145 | 2,510  |
| 238   | Nikon D700 | 40-80mm | Air    | 600        | 30          | 52,969 | 3,533  |
| 239   | Nikon D700 | 40-80mm | Air    | 600        | 30          | 48,474 | 1,565  |
| 240   | Nikon D700 | 40-80mm | Air    | 600        | 30          | 53,871 | -0,661 |
| 241   | Nikon D700 | 40-80mm | Air    | 650        | 30          | 74,349 | -1,645 |
| 242   | Nikon D700 | 40-80mm | Air    | 650        | 30          | 72,068 | -0,852 |

**Table s10. Raw data of the test set (14/14)**

| ID nr | Device     | Size    | Medium | Temp. (°C) | Time (min.) | L*     | B*      |
|-------|------------|---------|--------|------------|-------------|--------|---------|
| 243   | Nikon D700 | 40-80mm | Air    | 650        | 30          | 80,706 | -0,816  |
| 244   | Nikon D700 | 40-80mm | Air    | 650        | 30          | 72,425 | -1,649  |
| 245   | Nikon D700 | 40-80mm | Air    | 650        | 30          | 80,785 | 0,125   |
| 246   | Nikon D700 | 40-80mm | Air    | 700        | 30          | 80,951 | -3,028  |
| 247   | Nikon D700 | 40-80mm | Air    | 700        | 30          | 78,385 | -1,408  |
| 248   | Nikon D700 | 40-80mm | Air    | 700        | 30          | 62,243 | -11,000 |
| 249   | Nikon D700 | 40-80mm | Air    | 700        | 30          | 90,694 | 0,209   |
| 250   | Nikon D700 | 40-80mm | Air    | 700        | 30          | 77,085 | -2,078  |
| 251   | Nikon D700 | 40-80mm | Air    | 850        | 30          | 82     | 2,439   |
| 252   | Nikon D700 | 40-80mm | Air    | 850        | 30          | 82,163 | 2,719   |
| 253   | Nikon D700 | 40-80mm | Air    | 850        | 30          | 81,495 | 1,856   |
| 254   | Nikon D700 | 40-80mm | Air    | 850        | 30          | 92,548 | 1,439   |
| 255   | Nikon D700 | 40-80mm | Air    | 850        | 30          | 95,054 | 1,343   |
